# Supplementary material for: Physical development of infants born to patients with COVID-19 during pregnancy: 2 years of age
Source: PeerJ. 2024 Nov 12;12:e18481. doi: 10.7717/peerj.18481 (PMC11566510; doi:10.7717/peerj.18481)
Supplement: Supplemental Information 5 — Demographics, comorbidities, and outcomes for different groups. [file peerj-12-18481-s005.xlsx]

## Sheet: Fig 1A
Cohort	age_months_weight	Weight (g)
COVID non-Hospitalized	0	487.895
COVID non-Hospitalized	0	487.895
COVID non-Hospitalized	0	510.008
COVID non-Hospitalized	0	566.99
COVID non-Hospitalized	0	566.99
COVID non-Hospitalized	0	639.982
COVID non-Hospitalized	0	685.662
COVID non-Hospitalized	0	694.397
COVID non-Hospitalized	0	717.693
COVID non-Hospitalized	0	793.635
COVID non-Hospitalized	0	885.399
COVID non-Hospitalized	0	975.507
COVID non-Hospitalized	0	975.879
COVID non-Hospitalized	0	991.783
COVID non-Hospitalized	1	993.236
COVID non-Hospitalized	1	999.839
COVID non-Hospitalized	0	1023.81
COVID non-Hospitalized	0	1026.91
COVID non-Hospitalized	1	1029.81
COVID non-Hospitalized	1	1064.48
COVID non-Hospitalized	1	1122
COVID non-Hospitalized	0	1134.67
COVID non-Hospitalized	0	1135.61
COVID non-Hospitalized	0	1173.46
COVID non-Hospitalized	1	1175.51
COVID non-Hospitalized	0	1192.49
COVID non-Hospitalized	0	1198.92
COVID non-Hospitalized	0	1198.92
COVID non-Hospitalized	0	1251.84
COVID non-Hospitalized	0	1251.84
COVID non-Hospitalized	1	1368.5
COVID non-Hospitalized	1	1374.28
COVID non-Hospitalized	1	1475.85
COVID non-Hospitalized	1	1481.94
COVID non-Hospitalized	0	1496.1
COVID non-Hospitalized	2	1498.44
COVID non-Hospitalized	1	1520.15
COVID non-Hospitalized	0	1567.8
COVID non-Hospitalized	0	1574.71
COVID non-Hospitalized	0	1595.64
COVID non-Hospitalized	0	1598.51
COVID non-Hospitalized	0	1624.65
COVID non-Hospitalized	0	1624.65
COVID non-Hospitalized	2	1632.31
COVID non-Hospitalized	2	1649.82
COVID non-Hospitalized	2	1694.8
COVID non-Hospitalized	2	1707.15
COVID non-Hospitalized	1	1715.07
COVID non-Hospitalized	1	1715.07
COVID non-Hospitalized	1	1724.8
COVID non-Hospitalized	1	1731.66
COVID non-Hospitalized	1	1731.66
COVID non-Hospitalized	1	1734.63
COVID non-Hospitalized	0	1747.8
COVID non-Hospitalized	0	1747.8
COVID non-Hospitalized	1	1762.12
COVID non-Hospitalized	1	1773.96
COVID non-Hospitalized	0	1778.43
COVID non-Hospitalized	0	1778.43
COVID non-Hospitalized	0	1785.66
COVID non-Hospitalized	0	1809.47
COVID non-Hospitalized	0	1822.7
COVID non-Hospitalized	0	1831.24
COVID non-Hospitalized	2	1834.67
COVID non-Hospitalized	0	1863.76
COVID non-Hospitalized	0	1893.99
COVID non-Hospitalized	0	1893.99
COVID non-Hospitalized	0	1894.98
COVID non-Hospitalized	1	1898.28
COVID non-Hospitalized	0	1919.96
COVID non-Hospitalized	1	1944.66
COVID non-Hospitalized	0	1945.06
COVID non-Hospitalized	0	1962.44
COVID non-Hospitalized	0	1976.67
COVID non-Hospitalized	0	1977.93
COVID non-Hospitalized	0	1988.49
COVID non-Hospitalized	0	2002.09
COVID non-Hospitalized	0	2009.98
COVID non-Hospitalized	0	2022.49
COVID non-Hospitalized	0	2023.31
COVID non-Hospitalized	0	2023.31
COVID non-Hospitalized	0	2026.57
COVID non-Hospitalized	0	2031.72
COVID non-Hospitalized	0	2038.76
COVID non-Hospitalized	0	2038.76
COVID non-Hospitalized	0	2052.39
COVID non-Hospitalized	1	2060.18
COVID non-Hospitalized	2	2064.09
COVID non-Hospitalized	0	2072.4
COVID non-Hospitalized	0	2074.45
COVID non-Hospitalized	0	2074.45
COVID non-Hospitalized	1	2078.7
COVID non-Hospitalized	0	2092.57
COVID non-Hospitalized	0	2094.46
COVID non-Hospitalized	1	2100.98
COVID non-Hospitalized	1	2122.98
COVID non-Hospitalized	1	2122.98
COVID non-Hospitalized	0	2125.93
COVID non-Hospitalized	0	2136.75
COVID non-Hospitalized	1	2142.55
COVID non-Hospitalized	1	2142.55
COVID non-Hospitalized	0	2152.41
COVID non-Hospitalized	0	2155.64
COVID non-Hospitalized	0	2167.04
COVID non-Hospitalized	0	2169.87
COVID non-Hospitalized	0	2169.87
COVID non-Hospitalized	0	2175
COVID non-Hospitalized	0	2185.56
COVID non-Hospitalized	0	2193.18
COVID non-Hospitalized	1	2195.1
COVID non-Hospitalized	0	2209.62
COVID non-Hospitalized	0	2213.58
COVID non-Hospitalized	0	2213.98
COVID non-Hospitalized	0	2213.98
COVID non-Hospitalized	1	2222.67
COVID non-Hospitalized	1	2222.67
COVID non-Hospitalized	0	2225.05
COVID non-Hospitalized	0	2225.05
COVID non-Hospitalized	1	2232.3
COVID non-Hospitalized	1	2239.9
COVID non-Hospitalized	0	2253.5
COVID non-Hospitalized	1	2254.74
COVID non-Hospitalized	1	2254.74
COVID non-Hospitalized	1	2263.71
COVID non-Hospitalized	0	2265.06
COVID non-Hospitalized	0	2265.06
COVID non-Hospitalized	1	2269.76
COVID non-Hospitalized	0	2271.51
COVID non-Hospitalized	0	2285.31
COVID non-Hospitalized	0	2289.29
COVID non-Hospitalized	0	2294.33
COVID non-Hospitalized	0	2295.86
COVID non-Hospitalized	0	2303.85
COVID non-Hospitalized	0	2304.25
COVID non-Hospitalized	3	2307.32
COVID non-Hospitalized	0	2311.8
COVID non-Hospitalized	0	2311.8
COVID non-Hospitalized	2	2339.8
COVID non-Hospitalized	2	2339.99
COVID non-Hospitalized	0	2343.42
COVID non-Hospitalized	0	2348.39
COVID non-Hospitalized	1	2353.01
COVID non-Hospitalized	0	2353.05
COVID non-Hospitalized	0	2353.2
COVID non-Hospitalized	0	2359.15
COVID non-Hospitalized	0	2377.46
COVID non-Hospitalized	0	2377.46
COVID non-Hospitalized	0	2388.39
COVID non-Hospitalized	0	2396.15
COVID non-Hospitalized	0	2396.15
COVID non-Hospitalized	0	2402.39
COVID non-Hospitalized	0	2402.39
COVID non-Hospitalized	0	2404.09
COVID non-Hospitalized	2	2410.32
COVID non-Hospitalized	0	2416.31
COVID non-Hospitalized	0	2416.31
COVID non-Hospitalized	0	2419.92
COVID non-Hospitalized	0	2429.18
COVID non-Hospitalized	0	2429.22
COVID non-Hospitalized	0	2432.74
COVID non-Hospitalized	0	2433.93
COVID non-Hospitalized	0	2433.93
COVID non-Hospitalized	0	2437.78
COVID non-Hospitalized	1	2441.74
COVID non-Hospitalized	0	2456.3
COVID non-Hospitalized	0	2456.3
COVID non-Hospitalized	0	2460.1
COVID non-Hospitalized	0	2463.15
COVID non-Hospitalized	0	2466.5
COVID non-Hospitalized	0	2468.42
COVID non-Hospitalized	0	2468.42
COVID non-Hospitalized	0	2468.85
COVID non-Hospitalized	2	2476.65
COVID non-Hospitalized	1	2484.23
COVID non-Hospitalized	0	2487.95
COVID non-Hospitalized	2	2488.59
COVID non-Hospitalized	1	2489.09
COVID non-Hospitalized	1	2489.09
COVID non-Hospitalized	0	2489.49
COVID non-Hospitalized	0	2490.74
COVID non-Hospitalized	0	2491.64
COVID non-Hospitalized	3	2492.23
COVID non-Hospitalized	0	2492.77
COVID non-Hospitalized	1	2494.76
COVID non-Hospitalized	0	2495.66
COVID non-Hospitalized	0	2502.27
COVID non-Hospitalized	0	2503.52
COVID non-Hospitalized	0	2503.78
COVID non-Hospitalized	3	2512.62
COVID non-Hospitalized	0	2514.46
COVID non-Hospitalized	0	2521.97
COVID non-Hospitalized	0	2521.97
COVID non-Hospitalized	0	2523.96
COVID non-Hospitalized	0	2530.54
COVID non-Hospitalized	0	2535.01
COVID non-Hospitalized	1	2540.12
COVID non-Hospitalized	0	2548.74
COVID non-Hospitalized	0	2548.95
COVID non-Hospitalized	1	2556.06
COVID non-Hospitalized	0	2559.87
COVID non-Hospitalized	0	2562.33
COVID non-Hospitalized	0	2563.53
COVID non-Hospitalized	0	2563.53
COVID non-Hospitalized	0	2569.32
COVID non-Hospitalized	0	2569.46
COVID non-Hospitalized	0	2569.46
COVID non-Hospitalized	0	2572.58
COVID non-Hospitalized	0	2572.58
COVID non-Hospitalized	0	2573
COVID non-Hospitalized	0	2578.29
COVID non-Hospitalized	0	2580.23
COVID non-Hospitalized	0	2580.23
COVID non-Hospitalized	0	2590.98
COVID non-Hospitalized	0	2599.3
COVID non-Hospitalized	0	2599.62
COVID non-Hospitalized	0	2599.93
COVID non-Hospitalized	0	2604.02
COVID non-Hospitalized	0	2605.26
COVID non-Hospitalized	0	2606.31
COVID non-Hospitalized	0	2606.91
COVID non-Hospitalized	0	2608.35
COVID non-Hospitalized	0	2608.35
COVID non-Hospitalized	0	2614.89
COVID non-Hospitalized	0	2614.89
COVID non-Hospitalized	0	2625.97
COVID non-Hospitalized	0	2627.43
COVID non-Hospitalized	0	2629.3
COVID non-Hospitalized	0	2631.08
COVID non-Hospitalized	0	2631.9
COVID non-Hospitalized	0	2632.35
COVID non-Hospitalized	0	2635.23
COVID non-Hospitalized	0	2639.96
COVID non-Hospitalized	0	2639.96
COVID non-Hospitalized	0	2642.18
COVID non-Hospitalized	0	2651.21
COVID non-Hospitalized	0	2656.63
COVID non-Hospitalized	0	2656.63
COVID non-Hospitalized	0	2658.38
COVID non-Hospitalized	0	2658.81
COVID non-Hospitalized	0	2658.81
COVID non-Hospitalized	0	2658.95
COVID non-Hospitalized	0	2660.16
COVID non-Hospitalized	0	2660.16
COVID non-Hospitalized	0	2663.72
COVID non-Hospitalized	0	2666.95
COVID non-Hospitalized	0	2680.09
COVID non-Hospitalized	0	2682.01
COVID non-Hospitalized	0	2682.94
COVID non-Hospitalized	0	2683
COVID non-Hospitalized	0	2689.71
COVID non-Hospitalized	0	2689.71
COVID non-Hospitalized	0	2694.98
COVID non-Hospitalized	0	2703.84
COVID non-Hospitalized	0	2704.03
COVID non-Hospitalized	0	2704.92
COVID non-Hospitalized	0	2705.68
COVID non-Hospitalized	0	2705.68
COVID non-Hospitalized	1	2707.38
COVID non-Hospitalized	1	2707.38
COVID non-Hospitalized	2	2709.93
COVID non-Hospitalized	2	2709.93
COVID non-Hospitalized	0	2711.41
COVID non-Hospitalized	0	2714.54
COVID non-Hospitalized	0	2714.54
COVID non-Hospitalized	0	2715.18
COVID non-Hospitalized	1	2721.55
COVID non-Hospitalized	1	2721.55
COVID non-Hospitalized	0	2728.64
COVID non-Hospitalized	0	2728.64
COVID non-Hospitalized	0	2734.1
COVID non-Hospitalized	0	2737.24
COVID non-Hospitalized	0	2737.24
COVID non-Hospitalized	1	2739.98
COVID non-Hospitalized	0	2743.14
COVID non-Hospitalized	0	2745.01
COVID non-Hospitalized	3	2745.98
COVID non-Hospitalized	0	2746.6
COVID non-Hospitalized	0	2747.26
COVID non-Hospitalized	0	2747.92
COVID non-Hospitalized	0	2752.46
COVID non-Hospitalized	0	2755.18
COVID non-Hospitalized	0	2756.99
COVID non-Hospitalized	0	2763.97
COVID non-Hospitalized	0	2765.16
COVID non-Hospitalized	0	2767.54
COVID non-Hospitalized	0	2768
COVID non-Hospitalized	0	2770.65
COVID non-Hospitalized	0	2770.65
COVID non-Hospitalized	0	2771.28
COVID non-Hospitalized	3	2771.48
COVID non-Hospitalized	3	2771.54
COVID non-Hospitalized	0	2773.72
COVID non-Hospitalized	0	2777.23
COVID non-Hospitalized	0	2779.74
COVID non-Hospitalized	0	2781.33
COVID non-Hospitalized	0	2781.37
COVID non-Hospitalized	0	2785.34
COVID non-Hospitalized	0	2785.51
COVID non-Hospitalized	0	2786.98
COVID non-Hospitalized	0	2789.88
COVID non-Hospitalized	0	2789.98
COVID non-Hospitalized	0	2791.66
COVID non-Hospitalized	1	2792.43
COVID non-Hospitalized	0	2792.82
COVID non-Hospitalized	0	2792.82
COVID non-Hospitalized	1	2800.93
COVID non-Hospitalized	0	2808.45
COVID non-Hospitalized	0	2809.46
COVID non-Hospitalized	1	2810
COVID non-Hospitalized	1	2810
COVID non-Hospitalized	0	2811.28
COVID non-Hospitalized	0	2812.98
COVID non-Hospitalized	0	2813.41
COVID non-Hospitalized	4	2815.01
COVID non-Hospitalized	0	2821.27
COVID non-Hospitalized	0	2823.85
COVID non-Hospitalized	0	2823.95
COVID non-Hospitalized	0	2828.22
COVID non-Hospitalized	0	2828.89
COVID non-Hospitalized	0	2829.99
COVID non-Hospitalized	0	2829.99
COVID non-Hospitalized	0	2837.5
COVID non-Hospitalized	0	2838
COVID non-Hospitalized	0	2838.23
COVID non-Hospitalized	0	2838.23
COVID non-Hospitalized	0	2839.96
COVID non-Hospitalized	0	2840.28
COVID non-Hospitalized	0	2840.98
COVID non-Hospitalized	0	2847.43
COVID non-Hospitalized	0	2847.43
COVID non-Hospitalized	0	2847.62
COVID non-Hospitalized	0	2847.77
COVID non-Hospitalized	0	2850.46
COVID non-Hospitalized	0	2850.46
COVID non-Hospitalized	0	2854.09
COVID non-Hospitalized	0	2854.7
COVID non-Hospitalized	0	2856.78
COVID non-Hospitalized	0	2859.96
COVID non-Hospitalized	0	2859.96
COVID non-Hospitalized	0	2861.88
COVID non-Hospitalized	1	2863.3
COVID non-Hospitalized	0	2866.25
COVID non-Hospitalized	0	2866.25
COVID non-Hospitalized	0	2866.56
COVID non-Hospitalized	1	2867.1
COVID non-Hospitalized	0	2869.16
COVID non-Hospitalized	0	2871.24
COVID non-Hospitalized	0	2871.64
COVID non-Hospitalized	0	2873.18
COVID non-Hospitalized	0	2873.37
COVID non-Hospitalized	0	2873.96
COVID non-Hospitalized	0	2875.44
COVID non-Hospitalized	0	2879.79
COVID non-Hospitalized	0	2880.03
COVID non-Hospitalized	0	2881.94
COVID non-Hospitalized	1	2883.16
COVID non-Hospitalized	1	2883.16
COVID non-Hospitalized	0	2886.26
COVID non-Hospitalized	0	2888.7
COVID non-Hospitalized	0	2888.76
COVID non-Hospitalized	0	2895.43
COVID non-Hospitalized	0	2896.7
COVID non-Hospitalized	0	2897.32
COVID non-Hospitalized	0	2899.99
COVID non-Hospitalized	0	2900.68
COVID non-Hospitalized	0	2900.91
COVID non-Hospitalized	0	2901.49
COVID non-Hospitalized	0	2907.05
COVID non-Hospitalized	0	2907.05
COVID non-Hospitalized	0	2907.53
COVID non-Hospitalized	0	2910.02
COVID non-Hospitalized	0	2912.97
COVID non-Hospitalized	0	2913.29
COVID non-Hospitalized	0	2916.07
COVID non-Hospitalized	0	2916.07
COVID non-Hospitalized	0	2918.3
COVID non-Hospitalized	0	2918.98
COVID non-Hospitalized	0	2918.98
COVID non-Hospitalized	0	2919.5
COVID non-Hospitalized	0	2922.06
COVID non-Hospitalized	0	2922.27
COVID non-Hospitalized	2	2925.95
COVID non-Hospitalized	1	2934.18
COVID non-Hospitalized	0	2936.63
COVID non-Hospitalized	0	2936.63
COVID non-Hospitalized	0	2939.56
COVID non-Hospitalized	0	2941.34
COVID non-Hospitalized	0	2942.21
COVID non-Hospitalized	0	2945.01
COVID non-Hospitalized	0	2948.01
COVID non-Hospitalized	0	2948.01
COVID non-Hospitalized	0	2953.88
COVID non-Hospitalized	0	2953.88
COVID non-Hospitalized	0	2953.95
COVID non-Hospitalized	0	2954.23
COVID non-Hospitalized	0	2955.63
COVID non-Hospitalized	0	2957.54
COVID non-Hospitalized	1	2962.15
COVID non-Hospitalized	0	2963.99
COVID non-Hospitalized	0	2967.49
COVID non-Hospitalized	0	2967.57
COVID non-Hospitalized	0	2968.55
COVID non-Hospitalized	0	2970.39
COVID non-Hospitalized	0	2971.24
COVID non-Hospitalized	0	2972.45
COVID non-Hospitalized	0	2975
COVID non-Hospitalized	0	2978.31
COVID non-Hospitalized	0	2979.19
COVID non-Hospitalized	0	2979.99
COVID non-Hospitalized	2	2981.52
COVID non-Hospitalized	1	2983.31
COVID non-Hospitalized	0	2983.65
COVID non-Hospitalized	0	2984.07
COVID non-Hospitalized	2	2985.06
COVID non-Hospitalized	2	2985.06
COVID non-Hospitalized	0	2986.62
COVID non-Hospitalized	0	2986.62
COVID non-Hospitalized	0	2987.66
COVID non-Hospitalized	0	2989.91
COVID non-Hospitalized	0	2990.17
COVID non-Hospitalized	0	2990.4
COVID non-Hospitalized	0	2991.97
COVID non-Hospitalized	0	2991.97
COVID non-Hospitalized	0	2992.08
COVID non-Hospitalized	1	2993.71
COVID non-Hospitalized	0	2995.88
COVID non-Hospitalized	0	2996.64
COVID non-Hospitalized	0	2997.11
COVID non-Hospitalized	0	2997.3
COVID non-Hospitalized	0	2998.29
COVID non-Hospitalized	0	2998.29
COVID non-Hospitalized	1	3006.54
COVID non-Hospitalized	0	3006.75
COVID non-Hospitalized	0	3008
COVID non-Hospitalized	0	3009.87
COVID non-Hospitalized	0	3009.87
COVID non-Hospitalized	0	3010.22
COVID non-Hospitalized	0	3010.86
COVID non-Hospitalized	0	3012.17
COVID non-Hospitalized	0	3012.75
COVID non-Hospitalized	0	3014.45
COVID non-Hospitalized	0	3016.18
COVID non-Hospitalized	0	3018.37
COVID non-Hospitalized	1	3019.22
COVID non-Hospitalized	1	3019.22
COVID non-Hospitalized	0	3020
COVID non-Hospitalized	0	3021.68
COVID non-Hospitalized	0	3024.04
COVID non-Hospitalized	0	3024.1
COVID non-Hospitalized	0	3026.43
COVID non-Hospitalized	0	3026.43
COVID non-Hospitalized	0	3027.11
COVID non-Hospitalized	0	3030.73
COVID non-Hospitalized	1	3033.4
COVID non-Hospitalized	1	3033.4
COVID non-Hospitalized	0	3038.03
COVID non-Hospitalized	0	3039.07
COVID non-Hospitalized	0	3055.33
COVID non-Hospitalized	0	3055.33
COVID non-Hospitalized	2	3059.2
COVID non-Hospitalized	0	3059.31
COVID non-Hospitalized	0	3059.31
COVID non-Hospitalized	0	3061.47
COVID non-Hospitalized	1	3061.75
COVID non-Hospitalized	1	3061.75
COVID non-Hospitalized	1	3061.75
COVID non-Hospitalized	1	3061.75
COVID non-Hospitalized	1	3061.75
COVID non-Hospitalized	0	3065.81
COVID non-Hospitalized	0	3068.69
COVID non-Hospitalized	0	3074.13
COVID non-Hospitalized	0	3074.98
COVID non-Hospitalized	0	3075.87
COVID non-Hospitalized	0	3076.4
COVID non-Hospitalized	0	3083.21
COVID non-Hospitalized	0	3083.29
COVID non-Hospitalized	0	3086.92
COVID non-Hospitalized	0	3088.21
COVID non-Hospitalized	0	3091.44
COVID non-Hospitalized	0	3092.37
COVID non-Hospitalized	0	3092.37
COVID non-Hospitalized	0	3092.51
COVID non-Hospitalized	0	3095.11
COVID non-Hospitalized	0	3095.11
COVID non-Hospitalized	0	3096.62
COVID non-Hospitalized	0	3096.78
COVID non-Hospitalized	0	3097.37
COVID non-Hospitalized	0	3098.38
COVID non-Hospitalized	0	3098.6
COVID non-Hospitalized	0	3099.6
COVID non-Hospitalized	0	3099.93
COVID non-Hospitalized	0	3103.33
COVID non-Hospitalized	2	3104.27
COVID non-Hospitalized	2	3104.27
COVID non-Hospitalized	0	3104.48
COVID non-Hospitalized	0	3108.45
COVID non-Hospitalized	0	3111.03
COVID non-Hospitalized	0	3112.33
COVID non-Hospitalized	0	3116.65
COVID non-Hospitalized	0	3116.92
COVID non-Hospitalized	0	3117.03
COVID non-Hospitalized	0	3121.4
COVID non-Hospitalized	0	3121.64
COVID non-Hospitalized	0	3122.47
COVID non-Hospitalized	0	3123.27
COVID non-Hospitalized	0	3123.27
COVID non-Hospitalized	0	3124.9
COVID non-Hospitalized	0	3125.08
COVID non-Hospitalized	0	3125.71
COVID non-Hospitalized	0	3127.8
COVID non-Hospitalized	0	3129.43
COVID non-Hospitalized	0	3133.19
COVID non-Hospitalized	0	3133.95
COVID non-Hospitalized	0	3133.95
COVID non-Hospitalized	0	3134.39
COVID non-Hospitalized	0	3135.03
COVID non-Hospitalized	0	3138.53
COVID non-Hospitalized	0	3144.08
COVID non-Hospitalized	0	3149.54
COVID non-Hospitalized	0	3150.2
COVID non-Hospitalized	0	3151.33
COVID non-Hospitalized	0	3151.62
COVID non-Hospitalized	0	3152.37
COVID non-Hospitalized	0	3152.47
COVID non-Hospitalized	0	3152.47
COVID non-Hospitalized	1	3153.88
COVID non-Hospitalized	0	3155.49
COVID non-Hospitalized	0	3156.62
COVID non-Hospitalized	0	3158.7
COVID non-Hospitalized	0	3159.41
COVID non-Hospitalized	0	3159.41
COVID non-Hospitalized	0	3161.47
COVID non-Hospitalized	0	3161.47
COVID non-Hospitalized	0	3162.45
COVID non-Hospitalized	0	3169.69
COVID non-Hospitalized	0	3171.26
COVID non-Hospitalized	0	3173.26
COVID non-Hospitalized	1	3175.15
COVID non-Hospitalized	2	3175.15
COVID non-Hospitalized	1	3175.15
COVID non-Hospitalized	0	3176.04
COVID non-Hospitalized	0	3179.06
COVID non-Hospitalized	0	3179.75
COVID non-Hospitalized	1	3180.42
COVID non-Hospitalized	1	3180.42
COVID non-Hospitalized	0	3184.41
COVID non-Hospitalized	1	3184.6
COVID non-Hospitalized	1	3184.6
COVID non-Hospitalized	0	3189.68
COVID non-Hospitalized	0	3189.68
COVID non-Hospitalized	0	3192.16
COVID non-Hospitalized	2	3193.43
COVID non-Hospitalized	0	3194.99
COVID non-Hospitalized	0	3196.74
COVID non-Hospitalized	0	3196.74
COVID non-Hospitalized	0	3198.96
COVID non-Hospitalized	0	3202.55
COVID non-Hospitalized	0	3202.76
COVID non-Hospitalized	0	3204.35
COVID non-Hospitalized	0	3206.78
COVID non-Hospitalized	0	3208.6
COVID non-Hospitalized	0	3208.71
COVID non-Hospitalized	0	3210.65
COVID non-Hospitalized	0	3219.23
COVID non-Hospitalized	0	3219.23
COVID non-Hospitalized	0	3219.83
COVID non-Hospitalized	0	3219.83
COVID non-Hospitalized	0	3222.58
COVID non-Hospitalized	0	3222.58
COVID non-Hospitalized	0	3224.59
COVID non-Hospitalized	0	3229.27
COVID non-Hospitalized	0	3229.9
COVID non-Hospitalized	0	3230.29
COVID non-Hospitalized	0	3231.28
COVID non-Hospitalized	0	3234.17
COVID non-Hospitalized	0	3234.17
COVID non-Hospitalized	0	3235.03
COVID non-Hospitalized	0	3236.95
COVID non-Hospitalized	0	3236.95
COVID non-Hospitalized	0	3237.94
COVID non-Hospitalized	0	3239.5
COVID non-Hospitalized	0	3239.97
COVID non-Hospitalized	0	3240.01
COVID non-Hospitalized	0	3240.01
COVID non-Hospitalized	0	3243.28
COVID non-Hospitalized	1	3244.6
COVID non-Hospitalized	0	3246.14
COVID non-Hospitalized	0	3246.35
COVID non-Hospitalized	0	3247.11
COVID non-Hospitalized	0	3247.11
COVID non-Hospitalized	0	3247.25
COVID non-Hospitalized	0	3248.78
COVID non-Hospitalized	0	3253.82
COVID non-Hospitalized	0	3256.27
COVID non-Hospitalized	0	3256.27
COVID non-Hospitalized	0	3256.57
COVID non-Hospitalized	0	3258.71
COVID non-Hospitalized	1	3260.2
COVID non-Hospitalized	0	3262.83
COVID non-Hospitalized	0	3264.92
COVID non-Hospitalized	0	3267
COVID non-Hospitalized	0	3268.09
COVID non-Hospitalized	0	3268.32
COVID non-Hospitalized	0	3268.46
COVID non-Hospitalized	1	3271.53
COVID non-Hospitalized	0	3272.95
COVID non-Hospitalized	0	3272.95
COVID non-Hospitalized	0	3273.01
COVID non-Hospitalized	0	3273.29
COVID non-Hospitalized	0	3273.94
COVID non-Hospitalized	1	3274.09
COVID non-Hospitalized	0	3274.23
COVID non-Hospitalized	0	3274.53
COVID non-Hospitalized	0	3274.53
COVID non-Hospitalized	1	3277.35
COVID non-Hospitalized	0	3277.58
COVID non-Hospitalized	3	3278.92
COVID non-Hospitalized	0	3281.74
COVID non-Hospitalized	1	3285.71
COVID non-Hospitalized	2	3286.08
COVID non-Hospitalized	0	3286.28
COVID non-Hospitalized	0	3286.28
COVID non-Hospitalized	0	3287.65
COVID non-Hospitalized	1	3288.54
COVID non-Hospitalized	1	3288.54
COVID non-Hospitalized	0	3289.68
COVID non-Hospitalized	0	3291.1
COVID non-Hospitalized	0	3291.1
COVID non-Hospitalized	0	3294.78
COVID non-Hospitalized	0	3295.24
COVID non-Hospitalized	0	3298.68
COVID non-Hospitalized	0	3298.82
COVID non-Hospitalized	0	3298.82
COVID non-Hospitalized	0	3299.32
COVID non-Hospitalized	0	3299.32
COVID non-Hospitalized	0	3299.32
COVID non-Hospitalized	0	3299.32
COVID non-Hospitalized	0	3299.93
COVID non-Hospitalized	0	3299.96
COVID non-Hospitalized	0	3304.42
COVID non-Hospitalized	1	3305.55
COVID non-Hospitalized	0	3306.4
COVID non-Hospitalized	0	3306.4
COVID non-Hospitalized	0	3306.78
COVID non-Hospitalized	2	3308.39
COVID non-Hospitalized	2	3308.39
COVID non-Hospitalized	0	3308.48
COVID non-Hospitalized	0	3308.67
COVID non-Hospitalized	0	3308.81
COVID non-Hospitalized	1	3310.91
COVID non-Hospitalized	1	3311.04
COVID non-Hospitalized	1	3311.04
COVID non-Hospitalized	0	3311.7
COVID non-Hospitalized	1	3313.49
COVID non-Hospitalized	1	3313.49
COVID non-Hospitalized	0	3313.55
COVID non-Hospitalized	0	3314.4
COVID non-Hospitalized	0	3315.15
COVID non-Hospitalized	1	3316.89
COVID non-Hospitalized	0	3317.01
COVID non-Hospitalized	0	3317.46
COVID non-Hospitalized	0	3317.46
COVID non-Hospitalized	0	3319.73
COVID non-Hospitalized	0	3320.23
COVID non-Hospitalized	0	3320.23
COVID non-Hospitalized	0	3323.2
COVID non-Hospitalized	0	3323.2
COVID non-Hospitalized	0	3325.97
COVID non-Hospitalized	0	3326.06
COVID non-Hospitalized	3	3327.14
COVID non-Hospitalized	0	3327.4
COVID non-Hospitalized	1	3327.44
COVID non-Hospitalized	1	3328.23
COVID non-Hospitalized	1	3328.23
COVID non-Hospitalized	0	3332.43
COVID non-Hospitalized	0	3332.45
COVID non-Hospitalized	0	3333.69
COVID non-Hospitalized	0	3334.19
COVID non-Hospitalized	0	3338.21
COVID non-Hospitalized	0	3338.21
COVID non-Hospitalized	0	3338.35
COVID non-Hospitalized	0	3338.35
COVID non-Hospitalized	0	3339.8
COVID non-Hospitalized	0	3342.48
COVID non-Hospitalized	0	3342.48
COVID non-Hospitalized	0	3343.4
COVID non-Hospitalized	0	3343.54
COVID non-Hospitalized	1	3345.24
COVID non-Hospitalized	1	3345.24
COVID non-Hospitalized	1	3345.24
COVID non-Hospitalized	1	3345.24
COVID non-Hospitalized	0	3345.3
COVID non-Hospitalized	0	3346.57
COVID non-Hospitalized	0	3346.57
COVID non-Hospitalized	0	3347.09
COVID non-Hospitalized	0	3348.93
COVID non-Hospitalized	0	3348.93
COVID non-Hospitalized	1	3350.91
COVID non-Hospitalized	0	3351.55
COVID non-Hospitalized	0	3353.01
COVID non-Hospitalized	0	3353.11
COVID non-Hospitalized	0	3354.03
COVID non-Hospitalized	0	3354.6
COVID non-Hospitalized	0	3357.26
COVID non-Hospitalized	1	3358.95
COVID non-Hospitalized	0	3362.61
COVID non-Hospitalized	0	3363.58
COVID non-Hospitalized	0	3363.58
COVID non-Hospitalized	0	3368.38
COVID non-Hospitalized	0	3368.49
COVID non-Hospitalized	0	3370.37
COVID non-Hospitalized	0	3371.78
COVID non-Hospitalized	0	3373.08
COVID non-Hospitalized	0	3373.08
COVID non-Hospitalized	1	3374.73
COVID non-Hospitalized	4	3378.59
COVID non-Hospitalized	0	3379.14
COVID non-Hospitalized	0	3380.06
COVID non-Hospitalized	0	3380.29
COVID non-Hospitalized	0	3380.73
COVID non-Hospitalized	0	3380.73
COVID non-Hospitalized	0	3381.72
COVID non-Hospitalized	0	3382.62
COVID non-Hospitalized	0	3382.81
COVID non-Hospitalized	0	3383.6
COVID non-Hospitalized	2	3387.77
COVID non-Hospitalized	1	3390.04
COVID non-Hospitalized	0	3390.39
COVID non-Hospitalized	1	3390.6
COVID non-Hospitalized	0	3392.59
COVID non-Hospitalized	1	3396.27
COVID non-Hospitalized	0	3397.48
COVID non-Hospitalized	0	3398.77
COVID non-Hospitalized	1	3399.6
COVID non-Hospitalized	1	3399.6
COVID non-Hospitalized	0	3399.62
COVID non-Hospitalized	0	3400.95
COVID non-Hospitalized	1	3401.94
COVID non-Hospitalized	0	3403.15
COVID non-Hospitalized	0	3403.4
COVID non-Hospitalized	0	3403.4
COVID non-Hospitalized	0	3408.11
COVID non-Hospitalized	0	3408.27
COVID non-Hospitalized	0	3410.28
COVID non-Hospitalized	0	3417.3
COVID non-Hospitalized	0	3417.3
COVID non-Hospitalized	0	3417.99
COVID non-Hospitalized	0	3419.99
COVID non-Hospitalized	0	3419.99
COVID non-Hospitalized	0	3423.02
COVID non-Hospitalized	0	3423.84
COVID non-Hospitalized	0	3425.76
COVID non-Hospitalized	0	3426.83
COVID non-Hospitalized	0	3427.8
COVID non-Hospitalized	0	3428.02
COVID non-Hospitalized	0	3428.02
COVID non-Hospitalized	0	3428.7
COVID non-Hospitalized	0	3429.6
COVID non-Hospitalized	1	3430.29
COVID non-Hospitalized	1	3430.29
COVID non-Hospitalized	0	3432.56
COVID non-Hospitalized	0	3433.57
COVID non-Hospitalized	0	3435.32
COVID non-Hospitalized	0	3435.4
COVID non-Hospitalized	0	3437.66
COVID non-Hospitalized	0	3439.65
COVID non-Hospitalized	0	3439.93
COVID non-Hospitalized	0	3440
COVID non-Hospitalized	0	3441.7
COVID non-Hospitalized	0	3442.09
COVID non-Hospitalized	1	3442.77
COVID non-Hospitalized	0	3442.81
COVID non-Hospitalized	0	3443.05
COVID non-Hospitalized	0	3444.54
COVID non-Hospitalized	0	3446.24
COVID non-Hospitalized	1	3447.3
COVID non-Hospitalized	0	3447.87
COVID non-Hospitalized	1	3449.19
COVID non-Hospitalized	1	3449.19
COVID non-Hospitalized	0	3454.74
COVID non-Hospitalized	0	3454.96
COVID non-Hospitalized	1	3458.64
COVID non-Hospitalized	1	3458.64
COVID non-Hospitalized	0	3466.06
COVID non-Hospitalized	1	3467.26
COVID non-Hospitalized	1	3467.26
COVID non-Hospitalized	0	3467.36
COVID non-Hospitalized	0	3468.79
COVID non-Hospitalized	0	3472.25
COVID non-Hospitalized	3	3472.82
COVID non-Hospitalized	1	3475.65
COVID non-Hospitalized	0	3477.57
COVID non-Hospitalized	0	3478.09
COVID non-Hospitalized	0	3478.58
COVID non-Hospitalized	0	3482.17
COVID non-Hospitalized	0	3485.52
COVID non-Hospitalized	0	3485.8
COVID non-Hospitalized	2	3486.99
COVID non-Hospitalized	1	3486.99
COVID non-Hospitalized	0	3491.76
COVID non-Hospitalized	0	3492.9
COVID non-Hospitalized	0	3493.42
COVID non-Hospitalized	0	3494.76
COVID non-Hospitalized	0	3496.99
COVID non-Hospitalized	0	3496.99
COVID non-Hospitalized	0	3497.95
COVID non-Hospitalized	0	3497.95
COVID non-Hospitalized	0	3498.29
COVID non-Hospitalized	0	3500.6
COVID non-Hospitalized	0	3500.6
COVID non-Hospitalized	0	3501.13
COVID non-Hospitalized	0	3501.13
COVID non-Hospitalized	1	3501.17
COVID non-Hospitalized	1	3502.49
COVID non-Hospitalized	0	3507.97
COVID non-Hospitalized	0	3514.7
COVID non-Hospitalized	0	3514.7
COVID non-Hospitalized	1	3515.34
COVID non-Hospitalized	2	3515.34
COVID non-Hospitalized	0	3515.45
COVID non-Hospitalized	0	3516.62
COVID non-Hospitalized	0	3516.62
COVID non-Hospitalized	0	3521.65
COVID non-Hospitalized	0	3522.14
COVID non-Hospitalized	0	3522.24
COVID non-Hospitalized	0	3524.74
COVID non-Hospitalized	0	3524.74
COVID non-Hospitalized	0	3524.84
COVID non-Hospitalized	0	3525.55
COVID non-Hospitalized	0	3526.11
COVID non-Hospitalized	0	3527.81
COVID non-Hospitalized	0	3527.81
COVID non-Hospitalized	0	3531.1
COVID non-Hospitalized	0	3533.04
COVID non-Hospitalized	0	3533.04
COVID non-Hospitalized	1	3533.58
COVID non-Hospitalized	0	3533.89
COVID non-Hospitalized	1	3536.6
COVID non-Hospitalized	0	3538.66
COVID non-Hospitalized	0	3538.66
COVID non-Hospitalized	0	3541.8
COVID non-Hospitalized	0	3543.31
COVID non-Hospitalized	1	3543.69
COVID non-Hospitalized	1	3543.69
COVID non-Hospitalized	0	3544.5
COVID non-Hospitalized	0	3545.58
COVID non-Hospitalized	0	3546.62
COVID non-Hospitalized	0	3546.65
COVID non-Hospitalized	0	3546.65
COVID non-Hospitalized	0	3548.55
COVID non-Hospitalized	1	3555.03
COVID non-Hospitalized	0	3556.16
COVID non-Hospitalized	0	3557.51
COVID non-Hospitalized	0	3557.51
COVID non-Hospitalized	1	3557.87
COVID non-Hospitalized	0	3566.09
COVID non-Hospitalized	0	3566.88
COVID non-Hospitalized	0	3569.91
COVID non-Hospitalized	1	3572.04
COVID non-Hospitalized	1	3572.04
COVID non-Hospitalized	1	3572.04
COVID non-Hospitalized	1	3573.63
COVID non-Hospitalized	1	3573.63
COVID non-Hospitalized	1	3577.71
COVID non-Hospitalized	1	3577.71
COVID non-Hospitalized	0	3581.68
COVID non-Hospitalized	0	3581.75
COVID non-Hospitalized	0	3582.72
COVID non-Hospitalized	0	3582.72
COVID non-Hospitalized	0	3585.74
COVID non-Hospitalized	1	3585.82
COVID non-Hospitalized	0	3586.21
COVID non-Hospitalized	0	3586.69
COVID non-Hospitalized	0	3586.92
COVID non-Hospitalized	0	3588.77
COVID non-Hospitalized	0	3590.58
COVID non-Hospitalized	0	3591.32
COVID non-Hospitalized	0	3591.32
COVID non-Hospitalized	0	3591.88
COVID non-Hospitalized	0	3597.1
COVID non-Hospitalized	2	3603.22
COVID non-Hospitalized	0	3604.07
COVID non-Hospitalized	0	3606.91
COVID non-Hospitalized	1	3614.56
COVID non-Hospitalized	0	3618.91
COVID non-Hospitalized	0	3619.5
COVID non-Hospitalized	1	3623.07
COVID non-Hospitalized	0	3623.24
COVID non-Hospitalized	0	3625.68
COVID non-Hospitalized	0	3626.94
COVID non-Hospitalized	0	3626.94
COVID non-Hospitalized	1	3628.74
COVID non-Hospitalized	1	3631.86
COVID non-Hospitalized	0	3632.46
COVID non-Hospitalized	0	3632.46
COVID non-Hospitalized	0	3636.96
COVID non-Hospitalized	0	3638.94
COVID non-Hospitalized	0	3639.37
COVID non-Hospitalized	0	3639.61
COVID non-Hospitalized	0	3640.65
COVID non-Hospitalized	0	3641.38
COVID non-Hospitalized	0	3641.5
COVID non-Hospitalized	0	3645.35
COVID non-Hospitalized	2	3645.75
COVID non-Hospitalized	0	3646.84
COVID non-Hospitalized	0	3649.08
COVID non-Hospitalized	0	3649.08
COVID non-Hospitalized	0	3649.5
COVID non-Hospitalized	0	3650.71
COVID non-Hospitalized	0	3650.75
COVID non-Hospitalized	0	3653.47
COVID non-Hospitalized	0	3654.63
COVID non-Hospitalized	1	3657.09
COVID non-Hospitalized	0	3658.96
COVID non-Hospitalized	0	3658.96
COVID non-Hospitalized	2	3662.76
COVID non-Hospitalized	2	3662.76
COVID non-Hospitalized	0	3664.86
COVID non-Hospitalized	0	3664.86
COVID non-Hospitalized	0	3665.22
COVID non-Hospitalized	0	3666.31
COVID non-Hospitalized	0	3668.64
COVID non-Hospitalized	2	3671.26
COVID non-Hospitalized	0	3671.83
COVID non-Hospitalized	0	3672.11
COVID non-Hospitalized	0	3673.34
COVID non-Hospitalized	1	3674.1
COVID non-Hospitalized	1	3676.93
COVID non-Hospitalized	2	3682.26
COVID non-Hospitalized	0	3684.3
COVID non-Hospitalized	1	3685.44
COVID non-Hospitalized	1	3685.44
COVID non-Hospitalized	1	3685.44
COVID non-Hospitalized	1	3685.44
COVID non-Hospitalized	2	3691.11
COVID non-Hospitalized	1	3691.11
COVID non-Hospitalized	0	3691.67
COVID non-Hospitalized	0	3691.96
COVID non-Hospitalized	0	3693.23
COVID non-Hospitalized	1	3693.94
COVID non-Hospitalized	0	3694.56
COVID non-Hospitalized	0	3700.75
COVID non-Hospitalized	1	3705.99
COVID non-Hospitalized	1	3705.99
COVID non-Hospitalized	1	3707.27
COVID non-Hospitalized	0	3709.82
COVID non-Hospitalized	0	3711.61
COVID non-Hospitalized	1	3712.48
COVID non-Hospitalized	1	3713.79
COVID non-Hospitalized	2	3713.79
COVID non-Hospitalized	1	3713.79
COVID non-Hospitalized	1	3713.79
COVID non-Hospitalized	1	3719.46
COVID non-Hospitalized	0	3719.51
COVID non-Hospitalized	0	3722.94
COVID non-Hospitalized	3	3723.25
COVID non-Hospitalized	1	3723.57
COVID non-Hospitalized	1	3725.13
COVID non-Hospitalized	1	3727.96
COVID non-Hospitalized	0	3730.48
COVID non-Hospitalized	0	3732.12
COVID non-Hospitalized	1	3733.77
COVID non-Hospitalized	4	3734.96
COVID non-Hospitalized	0	3735.26
COVID non-Hospitalized	0	3735.26
COVID non-Hospitalized	1	3736.47
COVID non-Hospitalized	0	3736.69
COVID non-Hospitalized	0	3738.59
COVID non-Hospitalized	1	3741.85
COVID non-Hospitalized	3	3742.14
COVID non-Hospitalized	0	3746.18
COVID non-Hospitalized	0	3746.9
COVID non-Hospitalized	1	3747.81
COVID non-Hospitalized	0	3751.1
COVID non-Hospitalized	1	3753.48
COVID non-Hospitalized	1	3753.48
COVID non-Hospitalized	1	3753.48
COVID non-Hospitalized	1	3753.48
COVID non-Hospitalized	0	3754.67
COVID non-Hospitalized	1	3756.31
COVID non-Hospitalized	0	3759.71
COVID non-Hospitalized	0	3760.35
COVID non-Hospitalized	0	3760.35
COVID non-Hospitalized	2	3763.4
COVID non-Hospitalized	3	3764.82
COVID non-Hospitalized	2	3770.49
COVID non-Hospitalized	1	3773.39
COVID non-Hospitalized	0	3773.61
COVID non-Hospitalized	0	3780.69
COVID non-Hospitalized	0	3784.38
COVID non-Hospitalized	1	3787.5
COVID non-Hospitalized	1	3792.03
COVID non-Hospitalized	0	3795.8
COVID non-Hospitalized	0	3797.48
COVID non-Hospitalized	2	3799.97
COVID non-Hospitalized	2	3799.97
COVID non-Hospitalized	0	3804.18
COVID non-Hospitalized	0	3805.64
COVID non-Hospitalized	1	3810.18
COVID non-Hospitalized	1	3813.01
COVID non-Hospitalized	1	3820.38
COVID non-Hospitalized	0	3820.78
COVID non-Hospitalized	0	3821.39
COVID non-Hospitalized	0	3821.39
COVID non-Hospitalized	0	3825.06
COVID non-Hospitalized	0	3825.06
COVID non-Hospitalized	0	3825.65
COVID non-Hospitalized	1	3826.19
COVID non-Hospitalized	1	3826.19
COVID non-Hospitalized	1	3827.19
COVID non-Hospitalized	1	3827.19
COVID non-Hospitalized	1	3827.19
COVID non-Hospitalized	1	3827.19
COVID non-Hospitalized	1	3827.19
COVID non-Hospitalized	0	3827.33
COVID non-Hospitalized	0	3834.84
COVID non-Hospitalized	2	3841.22
COVID non-Hospitalized	1	3841.36
COVID non-Hospitalized	1	3841.36
COVID non-Hospitalized	1	3841.36
COVID non-Hospitalized	3	3841.36
COVID non-Hospitalized	1	3841.36
COVID non-Hospitalized	0	3841.52
COVID non-Hospitalized	0	3841.52
COVID non-Hospitalized	0	3842.97
COVID non-Hospitalized	1	3843.71
COVID non-Hospitalized	2	3844.24
COVID non-Hospitalized	0	3844.71
COVID non-Hospitalized	0	3844.71
COVID non-Hospitalized	0	3844.81
COVID non-Hospitalized	0	3845.05
COVID non-Hospitalized	0	3845.39
COVID non-Hospitalized	0	3845.9
COVID non-Hospitalized	0	3846.18
COVID non-Hospitalized	1	3847.98
COVID non-Hospitalized	1	3847.98
COVID non-Hospitalized	0	3848.84
COVID non-Hospitalized	1	3849.87
COVID non-Hospitalized	0	3851.42
COVID non-Hospitalized	3	3852.1
COVID non-Hospitalized	0	3854.44
COVID non-Hospitalized	0	3854.59
COVID non-Hospitalized	0	3854.59
COVID non-Hospitalized	1	3855.54
COVID non-Hospitalized	1	3855.54
COVID non-Hospitalized	0	3856.67
COVID non-Hospitalized	1	3861.21
COVID non-Hospitalized	0	3861.66
COVID non-Hospitalized	2	3864.89
COVID non-Hospitalized	2	3864.89
COVID non-Hospitalized	1	3866.87
COVID non-Hospitalized	0	3867.68
COVID non-Hospitalized	1	3869.71
COVID non-Hospitalized	1	3869.71
COVID non-Hospitalized	1	3881.05
COVID non-Hospitalized	2	3882.56
COVID non-Hospitalized	2	3882.56
COVID non-Hospitalized	1	3883.88
COVID non-Hospitalized	1	3883.88
COVID non-Hospitalized	0	3888.07
COVID non-Hospitalized	1	3889.55
COVID non-Hospitalized	0	3894.42
COVID non-Hospitalized	1	3895.22
COVID non-Hospitalized	0	3897.94
COVID non-Hospitalized	1	3898.06
COVID non-Hospitalized	1	3898.06
COVID non-Hospitalized	2	3900.04
COVID non-Hospitalized	2	3900.04
COVID non-Hospitalized	1	3900.78
COVID non-Hospitalized	0	3906.99
COVID non-Hospitalized	1	3909.4
COVID non-Hospitalized	1	3912.23
COVID non-Hospitalized	0	3916.59
COVID non-Hospitalized	1	3917.9
COVID non-Hospitalized	1	3917.9
COVID non-Hospitalized	0	3919.89
COVID non-Hospitalized	0	3919.89
COVID non-Hospitalized	1	3920.74
COVID non-Hospitalized	1	3920.74
COVID non-Hospitalized	1	3921.73
COVID non-Hospitalized	1	3922.16
COVID non-Hospitalized	1	3926.41
COVID non-Hospitalized	2	3926.41
COVID non-Hospitalized	1	3926.41
COVID non-Hospitalized	2	3926.41
COVID non-Hospitalized	0	3933.64
COVID non-Hospitalized	0	3933.64
COVID non-Hospitalized	1	3934.91
COVID non-Hospitalized	1	3940.58
COVID non-Hospitalized	4	3940.58
COVID non-Hospitalized	1	3940.58
COVID non-Hospitalized	1	3940.58
COVID non-Hospitalized	0	3942.17
COVID non-Hospitalized	1	3949.94
COVID non-Hospitalized	1	3954.33
COVID non-Hospitalized	1	3957.59
COVID non-Hospitalized	1	3957.59
COVID non-Hospitalized	2	3962.98
COVID non-Hospitalized	1	3968.93
COVID non-Hospitalized	1	3968.93
COVID non-Hospitalized	1	3968.93
COVID non-Hospitalized	2	3971.77
COVID non-Hospitalized	1	3973.94
COVID non-Hospitalized	1	3976.02
COVID non-Hospitalized	1	3976.02
COVID non-Hospitalized	1	3977.44
COVID non-Hospitalized	0	3978.17
COVID non-Hospitalized	1	3983.11
COVID non-Hospitalized	1	3983.11
COVID non-Hospitalized	0	3983.67
COVID non-Hospitalized	0	3983.67
COVID non-Hospitalized	4	3984.97
COVID non-Hospitalized	2	3985.94
COVID non-Hospitalized	2	3989.34
COVID non-Hospitalized	4	3990.13
COVID non-Hospitalized	1	3991.9
COVID non-Hospitalized	0	3993.12
COVID non-Hospitalized	0	3993.53
COVID non-Hospitalized	1	3997.28
COVID non-Hospitalized	0	3997.28
COVID non-Hospitalized	0	3997.71
COVID non-Hospitalized	0	3998.98
COVID non-Hospitalized	0	4011.32
COVID non-Hospitalized	1	4019.96
COVID non-Hospitalized	0	4023.14
COVID non-Hospitalized	0	4023.14
COVID non-Hospitalized	1	4025.63
COVID non-Hospitalized	1	4025.63
COVID non-Hospitalized	1	4025.63
COVID non-Hospitalized	1	4025.63
COVID non-Hospitalized	1	4025.63
COVID non-Hospitalized	1	4031.3
COVID non-Hospitalized	1	4034.99
COVID non-Hospitalized	3	4038.67
COVID non-Hospitalized	0	4039
COVID non-Hospitalized	1	4039.81
COVID non-Hospitalized	1	4039.81
COVID non-Hospitalized	2	4041.79
COVID non-Hospitalized	1	4047.32
COVID non-Hospitalized	0	4049.78
COVID non-Hospitalized	2	4050.01
COVID non-Hospitalized	1	4053.98
COVID non-Hospitalized	2	4053.98
COVID non-Hospitalized	1	4053.98
COVID non-Hospitalized	2	4053.98
COVID non-Hospitalized	1	4053.98
COVID non-Hospitalized	2	4053.98
COVID non-Hospitalized	2	4053.98
COVID non-Hospitalized	1	4053.98
COVID non-Hospitalized	2	4053.98
COVID non-Hospitalized	1	4057.53
COVID non-Hospitalized	1	4057.53
COVID non-Hospitalized	1	4059.65
COVID non-Hospitalized	1	4059.65
COVID non-Hospitalized	1	4062.77
COVID non-Hospitalized	2	4065.32
COVID non-Hospitalized	1	4067.21
COVID non-Hospitalized	1	4068.16
COVID non-Hospitalized	1	4068.16
COVID non-Hospitalized	1	4068.16
COVID non-Hospitalized	1	4070.99
COVID non-Hospitalized	0	4073.59
COVID non-Hospitalized	0	4075.53
COVID non-Hospitalized	0	4078.08
COVID non-Hospitalized	0	4078.08
COVID non-Hospitalized	1	4082.16
COVID non-Hospitalized	1	4082.33
COVID non-Hospitalized	5	4082.33
COVID non-Hospitalized	1	4082.33
COVID non-Hospitalized	2	4082.33
COVID non-Hospitalized	2	4082.33
COVID non-Hospitalized	2	4082.33
COVID non-Hospitalized	3	4084.88
COVID non-Hospitalized	3	4084.88
COVID non-Hospitalized	0	4085.81
COVID non-Hospitalized	1	4089.56
COVID non-Hospitalized	1	4096.51
COVID non-Hospitalized	1	4096.51
COVID non-Hospitalized	1	4096.51
COVID non-Hospitalized	1	4096.51
COVID non-Hospitalized	1	4097.55
COVID non-Hospitalized	1	4099.91
COVID non-Hospitalized	1	4099.91
COVID non-Hospitalized	1	4099.91
COVID non-Hospitalized	1	4103.88
COVID non-Hospitalized	1	4105.01
COVID non-Hospitalized	1	4105.01
COVID non-Hospitalized	1	4105.86
COVID non-Hospitalized	2	4110.68
COVID non-Hospitalized	1	4110.68
COVID non-Hospitalized	1	4110.68
COVID non-Hospitalized	1	4110.68
COVID non-Hospitalized	1	4110.68
COVID non-Hospitalized	2	4110.68
COVID non-Hospitalized	2	4110.68
COVID non-Hospitalized	1	4112.57
COVID non-Hospitalized	1	4112.57
COVID non-Hospitalized	1	4113.52
COVID non-Hospitalized	0	4118.19
COVID non-Hospitalized	3	4119.19
COVID non-Hospitalized	1	4122.02
COVID non-Hospitalized	1	4122.02
COVID non-Hospitalized	1	4122.02
COVID non-Hospitalized	1	4124.86
COVID non-Hospitalized	1	4124.86
COVID non-Hospitalized	0	4126.27
COVID non-Hospitalized	2	4127.69
COVID non-Hospitalized	2	4127.69
COVID non-Hospitalized	1	4139.03
COVID non-Hospitalized	1	4143
COVID non-Hospitalized	0	4144.98
COVID non-Hospitalized	0	4148.88
COVID non-Hospitalized	1	4149.14
COVID non-Hospitalized	1	4149.14
COVID non-Hospitalized	1	4149.94
COVID non-Hospitalized	2	4150.09
COVID non-Hospitalized	1	4150.37
COVID non-Hospitalized	1	4153.21
COVID non-Hospitalized	1	4156.04
COVID non-Hospitalized	1	4156.04
COVID non-Hospitalized	0	4159.35
COVID non-Hospitalized	1	4161.71
COVID non-Hospitalized	0	4164.14
COVID non-Hospitalized	2	4167.38
COVID non-Hospitalized	1	4167.38
COVID non-Hospitalized	1	4167.38
COVID non-Hospitalized	1	4167.38
COVID non-Hospitalized	1	4167.38
COVID non-Hospitalized	3	4167.38
COVID non-Hospitalized	1	4167.38
COVID non-Hospitalized	1	4173.33
COVID non-Hospitalized	0	4174.69
COVID non-Hospitalized	1	4181.55
COVID non-Hospitalized	1	4184.39
COVID non-Hospitalized	0	4187.7
COVID non-Hospitalized	1	4195.73
COVID non-Hospitalized	2	4195.73
COVID non-Hospitalized	1	4195.73
COVID non-Hospitalized	1	4195.73
COVID non-Hospitalized	2	4195.73
COVID non-Hospitalized	1	4195.73
COVID non-Hospitalized	1	4195.73
COVID non-Hospitalized	0	4197.01
COVID non-Hospitalized	1	4199.98
COVID non-Hospitalized	1	4199.98
COVID non-Hospitalized	3	4199.98
COVID non-Hospitalized	1	4199.98
COVID non-Hospitalized	1	4199.98
COVID non-Hospitalized	0	4200.69
COVID non-Hospitalized	1	4207.07
COVID non-Hospitalized	2	4209.9
COVID non-Hospitalized	2	4209.9
COVID non-Hospitalized	0	4211.42
COVID non-Hospitalized	1	4212.74
COVID non-Hospitalized	1	4212.74
COVID non-Hospitalized	1	4217.65
COVID non-Hospitalized	1	4217.65
COVID non-Hospitalized	1	4221.24
COVID non-Hospitalized	1	4221.24
COVID non-Hospitalized	1	4224.08
COVID non-Hospitalized	2	4224.08
COVID non-Hospitalized	1	4225.02
COVID non-Hospitalized	0	4228.74
COVID non-Hospitalized	0	4228.74
COVID non-Hospitalized	3	4230.03
COVID non-Hospitalized	3	4230.03
COVID non-Hospitalized	1	4234.71
COVID non-Hospitalized	1	4235.42
COVID non-Hospitalized	1	4235.42
COVID non-Hospitalized	1	4235.42
COVID non-Hospitalized	0	4237.42
COVID non-Hospitalized	2	4252.43
COVID non-Hospitalized	3	4252.43
COVID non-Hospitalized	1	4252.43
COVID non-Hospitalized	1	4252.43
COVID non-Hospitalized	1	4255.26
COVID non-Hospitalized	3	4255.26
COVID non-Hospitalized	1	4255.26
COVID non-Hospitalized	0	4260.79
COVID non-Hospitalized	2	4266.6
COVID non-Hospitalized	1	4273.69
COVID non-Hospitalized	1	4280.78
COVID non-Hospitalized	1	4280.78
COVID non-Hospitalized	2	4280.78
COVID non-Hospitalized	1	4280.78
COVID non-Hospitalized	1	4280.78
COVID non-Hospitalized	1	4280.78
COVID non-Hospitalized	4	4280.78
COVID non-Hospitalized	1	4286.45
COVID non-Hospitalized	0	4289.06
COVID non-Hospitalized	1	4291.13
COVID non-Hospitalized	1	4297.55
COVID non-Hospitalized	3	4297.79
COVID non-Hospitalized	3	4297.79
COVID non-Hospitalized	2	4298.07
COVID non-Hospitalized	2	4298.07
COVID non-Hospitalized	1	4300.06
COVID non-Hospitalized	1	4300.06
COVID non-Hospitalized	1	4300.06
COVID non-Hospitalized	1	4306.29
COVID non-Hospitalized	1	4306.29
COVID non-Hospitalized	2	4306.86
COVID non-Hospitalized	2	4306.86
COVID non-Hospitalized	3	4309.13
COVID non-Hospitalized	1	4309.13
COVID non-Hospitalized	1	4309.13
COVID non-Hospitalized	2	4309.13
COVID non-Hospitalized	1	4309.13
COVID non-Hospitalized	3	4309.13
COVID non-Hospitalized	4	4314.8
COVID non-Hospitalized	4	4314.8
COVID non-Hospitalized	0	4316.5
COVID non-Hospitalized	6	4319.48
COVID non-Hospitalized	0	4321.46
COVID non-Hospitalized	1	4323.3
COVID non-Hospitalized	1	4323.3
COVID non-Hospitalized	1	4325
COVID non-Hospitalized	1	4326.14
COVID non-Hospitalized	2	4326.14
COVID non-Hospitalized	1	4331.81
COVID non-Hospitalized	0	4336.97
COVID non-Hospitalized	1	4337.48
COVID non-Hospitalized	3	4337.48
COVID non-Hospitalized	3	4342.01
COVID non-Hospitalized	3	4342.01
COVID non-Hospitalized	1	4345.64
COVID non-Hospitalized	1	4345.98
COVID non-Hospitalized	1	4347.82
COVID non-Hospitalized	1	4348.82
COVID non-Hospitalized	0	4351.59
COVID non-Hospitalized	1	4354.49
COVID non-Hospitalized	1	4354.49
COVID non-Hospitalized	1	4357.32
COVID non-Hospitalized	1	4362.99
COVID non-Hospitalized	1	4362.99
COVID non-Hospitalized	0	4365.64
COVID non-Hospitalized	1	4365.83
COVID non-Hospitalized	1	4365.83
COVID non-Hospitalized	1	4365.83
COVID non-Hospitalized	1	4365.83
COVID non-Hospitalized	1	4368.66
COVID non-Hospitalized	1	4373.01
COVID non-Hospitalized	1	4373.01
COVID non-Hospitalized	2	4377.17
COVID non-Hospitalized	2	4377.17
COVID non-Hospitalized	1	4377.17
COVID non-Hospitalized	1	4378.58
COVID non-Hospitalized	1	4379.63
COVID non-Hospitalized	2	4380
COVID non-Hospitalized	1	4380
COVID non-Hospitalized	2	4382.84
COVID non-Hospitalized	1	4382.84
COVID non-Hospitalized	1	4390.4
COVID non-Hospitalized	1	4394.18
COVID non-Hospitalized	1	4394.18
COVID non-Hospitalized	1	4394.18
COVID non-Hospitalized	1	4394.18
COVID non-Hospitalized	1	4397.01
COVID non-Hospitalized	1	4397.01
COVID non-Hospitalized	3	4405.52
COVID non-Hospitalized	1	4405.52
COVID non-Hospitalized	1	4405.52
COVID non-Hospitalized	1	4408.35
COVID non-Hospitalized	0	4409.94
COVID non-Hospitalized	2	4411.19
COVID non-Hospitalized	4	4414.3
COVID non-Hospitalized	1	4422.53
COVID non-Hospitalized	2	4422.53
COVID non-Hospitalized	2	4422.53
COVID non-Hospitalized	2	4422.53
COVID non-Hospitalized	2	4422.53
COVID non-Hospitalized	1	4422.53
COVID non-Hospitalized	2	4422.53
COVID non-Hospitalized	0	4425.06
COVID non-Hospitalized	3	4429.9
COVID non-Hospitalized	1	4433.87
COVID non-Hospitalized	0	4434.66
COVID non-Hospitalized	2	4436.7
COVID non-Hospitalized	1	4436.7
COVID non-Hospitalized	0	4438.94
COVID non-Hospitalized	1	4441.14
COVID non-Hospitalized	2	4443.36
COVID non-Hospitalized	2	4443.36
COVID non-Hospitalized	2	4445.21
COVID non-Hospitalized	2	4449.88
COVID non-Hospitalized	1	4450.88
COVID non-Hospitalized	1	4450.88
COVID non-Hospitalized	1	4450.88
COVID non-Hospitalized	1	4450.88
COVID non-Hospitalized	1	4450.88
COVID non-Hospitalized	2	4450.88
COVID non-Hospitalized	2	4450.88
COVID non-Hospitalized	1	4455.98
COVID non-Hospitalized	4	4459.29
COVID non-Hospitalized	4	4459.29
COVID non-Hospitalized	1	4465.05
COVID non-Hospitalized	3	4467.88
COVID non-Hospitalized	3	4467.88
COVID non-Hospitalized	1	4469.68
COVID non-Hospitalized	1	4473.55
COVID non-Hospitalized	2	4479.22
COVID non-Hospitalized	1	4479.22
COVID non-Hospitalized	1	4479.22
COVID non-Hospitalized	2	4479.22
COVID non-Hospitalized	2	4479.22
COVID non-Hospitalized	1	4479.22
COVID non-Hospitalized	2	4479.22
COVID non-Hospitalized	1	4479.22
COVID non-Hospitalized	4	4479.22
COVID non-Hospitalized	2	4479.22
COVID non-Hospitalized	1	4482.06
COVID non-Hospitalized	1	4484.89
COVID non-Hospitalized	1	4490.56
COVID non-Hospitalized	1	4490.56
COVID non-Hospitalized	1	4493.4
COVID non-Hospitalized	1	4499.92
COVID non-Hospitalized	4	4499.92
COVID non-Hospitalized	1	4499.92
COVID non-Hospitalized	2	4500.58
COVID non-Hospitalized	2	4501.9
COVID non-Hospitalized	1	4501.9
COVID non-Hospitalized	2	4501.9
COVID non-Hospitalized	1	4507.57
COVID non-Hospitalized	1	4507.57
COVID non-Hospitalized	1	4507.57
COVID non-Hospitalized	2	4507.57
COVID non-Hospitalized	1	4507.57
COVID non-Hospitalized	1	4510.41
COVID non-Hospitalized	1	4520.05
COVID non-Hospitalized	1	4524.87
COVID non-Hospitalized	1	4530.25
COVID non-Hospitalized	1	4535.92
COVID non-Hospitalized	2	4535.92
COVID non-Hospitalized	1	4535.92
COVID non-Hospitalized	1	4535.92
COVID non-Hospitalized	1	4535.92
COVID non-Hospitalized	2	4535.92
COVID non-Hospitalized	2	4542.87
COVID non-Hospitalized	2	4542.87
COVID non-Hospitalized	2	4547.26
COVID non-Hospitalized	2	4552.93
COVID non-Hospitalized	1	4555.2
COVID non-Hospitalized	1	4560.97
COVID non-Hospitalized	2	4564.27
COVID non-Hospitalized	2	4564.27
COVID non-Hospitalized	2	4564.27
COVID non-Hospitalized	1	4564.27
COVID non-Hospitalized	1	4564.27
COVID non-Hospitalized	2	4567.11
COVID non-Hospitalized	2	4567.11
COVID non-Hospitalized	2	4578.45
COVID non-Hospitalized	1	4578.45
COVID non-Hospitalized	2	4578.45
COVID non-Hospitalized	1	4578.45
COVID non-Hospitalized	3	4579.94
COVID non-Hospitalized	1	4590.07
COVID non-Hospitalized	1	4590.07
COVID non-Hospitalized	2	4592.62
COVID non-Hospitalized	2	4592.62
COVID non-Hospitalized	2	4592.62
COVID non-Hospitalized	1	4592.62
COVID non-Hospitalized	5	4598.58
COVID non-Hospitalized	2	4601.13
COVID non-Hospitalized	2	4601.13
COVID non-Hospitalized	1	4604.95
COVID non-Hospitalized	1	4604.95
COVID non-Hospitalized	1	4606.8
COVID non-Hospitalized	1	4609.63
COVID non-Hospitalized	1	4613.88
COVID non-Hospitalized	2	4619.84
COVID non-Hospitalized	1	4620.97
COVID non-Hospitalized	1	4620.97
COVID non-Hospitalized	2	4620.97
COVID non-Hospitalized	3	4620.97
COVID non-Hospitalized	1	4620.97
COVID non-Hospitalized	1	4626.64
COVID non-Hospitalized	2	4626.64
COVID non-Hospitalized	2	4629.29
COVID non-Hospitalized	2	4629.29
COVID non-Hospitalized	1	4643.65
COVID non-Hospitalized	3	4649.32
COVID non-Hospitalized	1	4649.32
COVID non-Hospitalized	3	4649.32
COVID non-Hospitalized	1	4649.32
COVID non-Hospitalized	3	4649.32
COVID non-Hospitalized	2	4649.32
COVID non-Hospitalized	2	4649.32
COVID non-Hospitalized	2	4649.32
COVID non-Hospitalized	1	4649.32
COVID non-Hospitalized	2	4649.32
COVID non-Hospitalized	3	4649.32
COVID non-Hospitalized	2	4649.32
COVID non-Hospitalized	1	4649.32
COVID non-Hospitalized	2	4649.32
COVID non-Hospitalized	3	4649.32
COVID non-Hospitalized	2	4649.89
COVID non-Hospitalized	1	4658.11
COVID non-Hospitalized	1	4660.09
COVID non-Hospitalized	1	4660.09
COVID non-Hospitalized	2	4660.66
COVID non-Hospitalized	2	4660.66
COVID non-Hospitalized	3	4663.5
COVID non-Hospitalized	1	4663.5
COVID non-Hospitalized	3	4663.5
COVID non-Hospitalized	1	4666.33
COVID non-Hospitalized	1	4670.68
COVID non-Hospitalized	2	4672
COVID non-Hospitalized	1	4672.57
COVID non-Hospitalized	1	4677.67
COVID non-Hospitalized	2	4677.67
COVID non-Hospitalized	1	4677.67
COVID non-Hospitalized	2	4677.67
COVID non-Hospitalized	2	4685.04
COVID non-Hospitalized	3	4689.01
COVID non-Hospitalized	1	4689.67
COVID non-Hospitalized	2	4689.86
COVID non-Hospitalized	4	4693.02
COVID non-Hospitalized	4	4700.07
COVID non-Hospitalized	2	4700.35
COVID non-Hospitalized	1	4700.35
COVID non-Hospitalized	2	4702.19
COVID non-Hospitalized	1	4702.62
COVID non-Hospitalized	1	4702.62
COVID non-Hospitalized	1	4706.02
COVID non-Hospitalized	1	4706.02
COVID non-Hospitalized	1	4706.02
COVID non-Hospitalized	1	4706.02
COVID non-Hospitalized	2	4711.69
COVID non-Hospitalized	2	4714.24
COVID non-Hospitalized	2	4714.24
COVID non-Hospitalized	2	4717.36
COVID non-Hospitalized	2	4720.2
COVID non-Hospitalized	4	4723.46
COVID non-Hospitalized	0	4729.44
COVID non-Hospitalized	2	4731.39
COVID non-Hospitalized	2	4732.95
COVID non-Hospitalized	1	4734.37
COVID non-Hospitalized	2	4734.37
COVID non-Hospitalized	2	4734.37
COVID non-Hospitalized	1	4734.37
COVID non-Hospitalized	2	4734.37
COVID non-Hospitalized	1	4748.55
COVID non-Hospitalized	1	4748.55
COVID non-Hospitalized	2	4748.55
COVID non-Hospitalized	1	4748.55
COVID non-Hospitalized	1	4748.55
COVID non-Hospitalized	1	4748.55
COVID non-Hospitalized	1	4748.55
COVID non-Hospitalized	1	4752.94
COVID non-Hospitalized	0	4758.83
COVID non-Hospitalized	5	4759.23
COVID non-Hospitalized	2	4759.74
COVID non-Hospitalized	1	4762.72
COVID non-Hospitalized	1	4762.72
COVID non-Hospitalized	1	4762.72
COVID non-Hospitalized	5	4762.72
COVID non-Hospitalized	4	4762.72
COVID non-Hospitalized	2	4762.72
COVID non-Hospitalized	1	4765.55
COVID non-Hospitalized	2	4768.39
COVID non-Hospitalized	2	4768.39
COVID non-Hospitalized	2	4768.39
COVID non-Hospitalized	2	4768.39
COVID non-Hospitalized	1	4780.01
COVID non-Hospitalized	1	4791.07
COVID non-Hospitalized	1	4791.07
COVID non-Hospitalized	1	4791.07
COVID non-Hospitalized	1	4791.07
COVID non-Hospitalized	2	4791.07
COVID non-Hospitalized	1	4791.07
COVID non-Hospitalized	3	4795.04
COVID non-Hospitalized	2	4796.74
COVID non-Hospitalized	2	4796.74
COVID non-Hospitalized	2	4796.74
COVID non-Hospitalized	2	4802.41
COVID non-Hospitalized	2	4805.24
COVID non-Hospitalized	1	4805.24
COVID non-Hospitalized	1	4805.24
COVID non-Hospitalized	5	4810.06
COVID non-Hospitalized	5	4810.06
COVID non-Hospitalized	2	4813.75
COVID non-Hospitalized	1	4819.42
COVID non-Hospitalized	1	4819.42
COVID non-Hospitalized	2	4819.42
COVID non-Hospitalized	2	4819.42
COVID non-Hospitalized	1	4819.42
COVID non-Hospitalized	2	4819.42
COVID non-Hospitalized	1	4819.42
COVID non-Hospitalized	2	4823.53
COVID non-Hospitalized	2	4825.09
COVID non-Hospitalized	2	4825.09
COVID non-Hospitalized	4	4842.1
COVID non-Hospitalized	2	4842.1
COVID non-Hospitalized	1	4844.93
COVID non-Hospitalized	2	4847.77
COVID non-Hospitalized	2	4847.77
COVID non-Hospitalized	2	4847.77
COVID non-Hospitalized	2	4853.44
COVID non-Hospitalized	1	4855.99
COVID non-Hospitalized	2	4859.11
COVID non-Hospitalized	2	4859.11
COVID non-Hospitalized	2	4861.94
COVID non-Hospitalized	1	4864.78
COVID non-Hospitalized	2	4866.34
COVID non-Hospitalized	2	4873
COVID non-Hospitalized	1	4873
COVID non-Hospitalized	1	4876.12
COVID non-Hospitalized	2	4876.12
COVID non-Hospitalized	2	4876.12
COVID non-Hospitalized	2	4876.12
COVID non-Hospitalized	1	4876.12
COVID non-Hospitalized	2	4880.23
COVID non-Hospitalized	2	4889.16
COVID non-Hospitalized	2	4890.29
COVID non-Hospitalized	2	4890.29
COVID non-Hospitalized	5	4898.8
COVID non-Hospitalized	2	4898.8
COVID non-Hospitalized	1	4899.93
COVID non-Hospitalized	1	4904.47
COVID non-Hospitalized	2	4904.47
COVID non-Hospitalized	2	4904.47
COVID non-Hospitalized	2	4904.47
COVID non-Hospitalized	1	4904.47
COVID non-Hospitalized	2	4927.15
COVID non-Hospitalized	3	4932.82
COVID non-Hospitalized	2	4932.82
COVID non-Hospitalized	2	4932.82
COVID non-Hospitalized	2	4934.23
COVID non-Hospitalized	2	4944.16
COVID non-Hospitalized	2	4944.16
COVID non-Hospitalized	4	4946.99
COVID non-Hospitalized	2	4946.99
COVID non-Hospitalized	2	4961.17
COVID non-Hospitalized	5	4961.17
COVID non-Hospitalized	2	4961.17
COVID non-Hospitalized	1	4961.17
COVID non-Hospitalized	2	4961.17
COVID non-Hospitalized	2	4961.17
COVID non-Hospitalized	2	4961.17
COVID non-Hospitalized	2	4965.56
COVID non-Hospitalized	1	4967.69
COVID non-Hospitalized	3	4975.06
COVID non-Hospitalized	5	4975.34
COVID non-Hospitalized	1	4975.34
COVID non-Hospitalized	2	4975.34
COVID non-Hospitalized	2	4975.34
COVID non-Hospitalized	1	4979.2
COVID non-Hospitalized	2	4983.85
COVID non-Hospitalized	2	4983.85
COVID non-Hospitalized	6	4989.52
COVID non-Hospitalized	1	4989.52
COVID non-Hospitalized	6	4989.52
COVID non-Hospitalized	1	4989.52
COVID non-Hospitalized	2	4989.52
COVID non-Hospitalized	1	4989.52
COVID non-Hospitalized	5	4989.52
COVID non-Hospitalized	1	4989.52
COVID non-Hospitalized	3	4989.52
COVID non-Hospitalized	7	4989.52
COVID non-Hospitalized	2	4989.52
COVID non-Hospitalized	1	5000.01
COVID non-Hospitalized	4	5000.62
COVID non-Hospitalized	1	5000.86
COVID non-Hospitalized	1	5000.86
COVID non-Hospitalized	1	5015.41
COVID non-Hospitalized	2	5017.87
COVID non-Hospitalized	2	5017.87
COVID non-Hospitalized	2	5017.87
COVID non-Hospitalized	2	5017.87
COVID non-Hospitalized	1	5017.87
COVID non-Hospitalized	1	5023.54
COVID non-Hospitalized	3	5029.21
COVID non-Hospitalized	3	5032.04
COVID non-Hospitalized	2	5032.04
COVID non-Hospitalized	4	5034.88
COVID non-Hospitalized	4	5034.88
COVID non-Hospitalized	7	5035.02
COVID non-Hospitalized	2	5046.22
COVID non-Hospitalized	2	5046.22
COVID non-Hospitalized	2	5046.22
COVID non-Hospitalized	1	5046.22
COVID non-Hospitalized	2	5046.22
COVID non-Hospitalized	2	5046.22
COVID non-Hospitalized	2	5046.22
COVID non-Hospitalized	2	5046.22
COVID non-Hospitalized	1	5046.22
COVID non-Hospitalized	2	5046.22
COVID non-Hospitalized	1	5046.22
COVID non-Hospitalized	2	5057.23
COVID non-Hospitalized	2	5057.55
COVID non-Hospitalized	2	5057.55
COVID non-Hospitalized	2	5059.82
COVID non-Hospitalized	2	5060.39
COVID non-Hospitalized	2	5060.39
COVID non-Hospitalized	2	5063.22
COVID non-Hospitalized	3	5068.89
COVID non-Hospitalized	2	5073.71
COVID non-Hospitalized	6	5074.56
COVID non-Hospitalized	1	5074.56
COVID non-Hospitalized	2	5074.56
COVID non-Hospitalized	2	5074.56
COVID non-Hospitalized	6	5074.56
COVID non-Hospitalized	2	5074.56
COVID non-Hospitalized	1	5074.56
COVID non-Hospitalized	3	5074.56
COVID non-Hospitalized	2	5080.23
COVID non-Hospitalized	1	5081.41
COVID non-Hospitalized	4	5085.9
COVID non-Hospitalized	4	5085.9
COVID non-Hospitalized	1	5088.74
COVID non-Hospitalized	2	5088.74
COVID non-Hospitalized	2	5088.74
COVID non-Hospitalized	2	5102.91
COVID non-Hospitalized	1	5102.91
COVID non-Hospitalized	2	5102.91
COVID non-Hospitalized	1	5102.91
COVID non-Hospitalized	2	5102.91
COVID non-Hospitalized	2	5102.91
COVID non-Hospitalized	2	5102.91
COVID non-Hospitalized	2	5102.91
COVID non-Hospitalized	2	5102.91
COVID non-Hospitalized	3	5114.25
COVID non-Hospitalized	2	5117.09
COVID non-Hospitalized	2	5117.09
COVID non-Hospitalized	2	5119.92
COVID non-Hospitalized	2	5119.92
COVID non-Hospitalized	1	5125.59
COVID non-Hospitalized	3	5126.95
COVID non-Hospitalized	4	5131.26
COVID non-Hospitalized	2	5131.26
COVID non-Hospitalized	3	5140.05
COVID non-Hospitalized	3	5140.05
COVID non-Hospitalized	6	5145.44
COVID non-Hospitalized	1	5145.44
COVID non-Hospitalized	1	5148.27
COVID non-Hospitalized	2	5151.11
COVID non-Hospitalized	2	5151.11
COVID non-Hospitalized	4	5153.94
COVID non-Hospitalized	1	5153.94
COVID non-Hospitalized	2	5159.61
COVID non-Hospitalized	2	5159.61
COVID non-Hospitalized	1	5159.61
COVID non-Hospitalized	2	5159.61
COVID non-Hospitalized	2	5159.61
COVID non-Hospitalized	4	5159.61
COVID non-Hospitalized	5	5159.61
COVID non-Hospitalized	3	5165.28
COVID non-Hospitalized	2	5170.95
COVID non-Hospitalized	2	5170.95
COVID non-Hospitalized	1	5187.96
COVID non-Hospitalized	4	5187.96
COVID non-Hospitalized	1	5187.96
COVID non-Hospitalized	2	5187.96
COVID non-Hospitalized	1	5187.96
COVID non-Hospitalized	2	5193.63
COVID non-Hospitalized	3	5193.63
COVID non-Hospitalized	2	5193.63
COVID non-Hospitalized	2	5195.05
COVID non-Hospitalized	2	5199.87
COVID non-Hospitalized	2	5199.87
COVID non-Hospitalized	1	5202.14
COVID non-Hospitalized	2	5204.97
COVID non-Hospitalized	2	5216.31
COVID non-Hospitalized	5	5216.31
COVID non-Hospitalized	2	5216.31
COVID non-Hospitalized	4	5216.31
COVID non-Hospitalized	2	5216.31
COVID non-Hospitalized	2	5216.31
COVID non-Hospitalized	2	5216.31
COVID non-Hospitalized	5	5216.31
COVID non-Hospitalized	2	5216.31
COVID non-Hospitalized	2	5216.31
COVID non-Hospitalized	1	5216.31
COVID non-Hospitalized	4	5216.31
COVID non-Hospitalized	5	5220
COVID non-Hospitalized	1	5221.98
COVID non-Hospitalized	2	5221.98
COVID non-Hospitalized	8	5227.09
COVID non-Hospitalized	2	5230.49
COVID non-Hospitalized	2	5230.49
COVID non-Hospitalized	2	5234.17
COVID non-Hospitalized	3	5235.59
COVID non-Hospitalized	3	5235.59
COVID non-Hospitalized	2	5238.99
COVID non-Hospitalized	2	5244.66
COVID non-Hospitalized	2	5244.66
COVID non-Hospitalized	2	5244.66
COVID non-Hospitalized	2	5244.66
COVID non-Hospitalized	2	5244.66
COVID non-Hospitalized	2	5244.66
COVID non-Hospitalized	2	5244.66
COVID non-Hospitalized	2	5244.66
COVID non-Hospitalized	2	5244.66
COVID non-Hospitalized	2	5251.47
COVID non-Hospitalized	2	5251.47
COVID non-Hospitalized	2	5258.84
COVID non-Hospitalized	3	5261.67
COVID non-Hospitalized	2	5261.67
COVID non-Hospitalized	3	5278.68
COVID non-Hospitalized	3	5290.02
COVID non-Hospitalized	4	5299.94
COVID non-Hospitalized	2	5301.36
COVID non-Hospitalized	1	5301.36
COVID non-Hospitalized	2	5301.36
COVID non-Hospitalized	2	5301.36
COVID non-Hospitalized	3	5301.36
COVID non-Hospitalized	2	5301.36
COVID non-Hospitalized	3	5301.36
COVID non-Hospitalized	1	5301.36
COVID non-Hospitalized	2	5315.54
COVID non-Hospitalized	2	5315.54
COVID non-Hospitalized	2	5315.54
COVID non-Hospitalized	2	5315.54
COVID non-Hospitalized	2	5315.54
COVID non-Hospitalized	2	5315.54
COVID non-Hospitalized	2	5315.54
COVID non-Hospitalized	2	5315.54
COVID non-Hospitalized	2	5318.37
COVID non-Hospitalized	2	5318.37
COVID non-Hospitalized	4	5324.04
COVID non-Hospitalized	2	5329.71
COVID non-Hospitalized	4	5329.71
COVID non-Hospitalized	2	5329.71
COVID non-Hospitalized	2	5329.71
COVID non-Hospitalized	2	5335.38
COVID non-Hospitalized	2	5343.89
COVID non-Hospitalized	6	5343.89
COVID non-Hospitalized	1	5357.78
COVID non-Hospitalized	2	5358.06
COVID non-Hospitalized	3	5358.06
COVID non-Hospitalized	2	5358.06
COVID non-Hospitalized	2	5358.06
COVID non-Hospitalized	4	5362.91
COVID non-Hospitalized	3	5363.73
COVID non-Hospitalized	2	5365.15
COVID non-Hospitalized	5	5365.15
COVID non-Hospitalized	2	5365.15
COVID non-Hospitalized	3	5371.53
COVID non-Hospitalized	3	5371.53
COVID non-Hospitalized	2	5375.07
COVID non-Hospitalized	2	5380.74
COVID non-Hospitalized	2	5380.74
COVID non-Hospitalized	5	5384.99
COVID non-Hospitalized	2	5386.41
COVID non-Hospitalized	1	5386.41
COVID non-Hospitalized	2	5386.41
COVID non-Hospitalized	2	5386.41
COVID non-Hospitalized	2	5386.41
COVID non-Hospitalized	2	5386.41
COVID non-Hospitalized	3	5386.41
COVID non-Hospitalized	2	5386.41
COVID non-Hospitalized	3	5386.41
COVID non-Hospitalized	7	5393.31
COVID non-Hospitalized	2	5394.91
COVID non-Hospitalized	3	5400.02
COVID non-Hospitalized	2	5400.58
COVID non-Hospitalized	2	5402.29
COVID non-Hospitalized	3	5403.42
COVID non-Hospitalized	3	5403.42
COVID non-Hospitalized	1	5408.14
COVID non-Hospitalized	3	5411
COVID non-Hospitalized	2	5414.76
COVID non-Hospitalized	2	5414.76
COVID non-Hospitalized	2	5414.76
COVID non-Hospitalized	2	5414.76
COVID non-Hospitalized	6	5414.87
COVID non-Hospitalized	5	5415.04
COVID non-Hospitalized	2	5417.59
COVID non-Hospitalized	4	5420.05
COVID non-Hospitalized	4	5420.05
COVID non-Hospitalized	1	5420.43
COVID non-Hospitalized	5	5424.4
COVID non-Hospitalized	3	5426.81
COVID non-Hospitalized	1	5431.77
COVID non-Hospitalized	2	5431.77
COVID non-Hospitalized	1	5431.77
COVID non-Hospitalized	2	5440.27
COVID non-Hospitalized	1	5443.11
COVID non-Hospitalized	4	5443.11
COVID non-Hospitalized	3	5443.11
COVID non-Hospitalized	4	5443.11
COVID non-Hospitalized	2	5443.11
COVID non-Hospitalized	2	5443.11
COVID non-Hospitalized	2	5443.11
COVID non-Hospitalized	2	5443.11
COVID non-Hospitalized	2	5443.11
COVID non-Hospitalized	2	5443.11
COVID non-Hospitalized	4	5443.11
COVID non-Hospitalized	2	5443.11
COVID non-Hospitalized	2	5443.11
COVID non-Hospitalized	2	5443.11
COVID non-Hospitalized	2	5443.11
COVID non-Hospitalized	2	5448.78
COVID non-Hospitalized	2	5457.28
COVID non-Hospitalized	4	5457.28
COVID non-Hospitalized	6	5459.83
COVID non-Hospitalized	2	5460.12
COVID non-Hospitalized	3	5465.79
COVID non-Hospitalized	2	5465.79
COVID non-Hospitalized	2	5465.79
COVID non-Hospitalized	2	5465.79
COVID non-Hospitalized	2	5467.35
COVID non-Hospitalized	2	5471.46
COVID non-Hospitalized	2	5471.46
COVID non-Hospitalized	3	5474.86
COVID non-Hospitalized	2	5475.43
COVID non-Hospitalized	2	5477.13
COVID non-Hospitalized	3	5481.85
COVID non-Hospitalized	3	5482.8
COVID non-Hospitalized	3	5482.8
COVID non-Hospitalized	2	5485.63
COVID non-Hospitalized	4	5499.81
COVID non-Hospitalized	2	5499.81
COVID non-Hospitalized	3	5499.81
COVID non-Hospitalized	4	5499.81
COVID non-Hospitalized	2	5499.81
COVID non-Hospitalized	4	5505.48
COVID non-Hospitalized	2	5505.48
COVID non-Hospitalized	2	5505.48
COVID non-Hospitalized	2	5506.04
COVID non-Hospitalized	3	5511.15
COVID non-Hospitalized	3	5511.15
COVID non-Hospitalized	2	5528.16
COVID non-Hospitalized	3	5528.16
COVID non-Hospitalized	2	5528.16
COVID non-Hospitalized	7	5540.06
COVID non-Hospitalized	3	5544.88
COVID non-Hospitalized	8	5544.88
COVID non-Hospitalized	3	5544.88
COVID non-Hospitalized	4	5545.17
COVID non-Hospitalized	3	5556.51
COVID non-Hospitalized	6	5556.51
COVID non-Hospitalized	2	5566.26
COVID non-Hospitalized	4	5570.68
COVID non-Hospitalized	2	5570.68
COVID non-Hospitalized	2	5570.68
COVID non-Hospitalized	5	5576.35
COVID non-Hospitalized	2	5579.19
COVID non-Hospitalized	4	5582.02
COVID non-Hospitalized	2	5584.86
COVID non-Hospitalized	3	5584.86
COVID non-Hospitalized	4	5584.86
COVID non-Hospitalized	2	5584.86
COVID non-Hospitalized	2	5584.86
COVID non-Hospitalized	2	5590.53
COVID non-Hospitalized	4	5593.36
COVID non-Hospitalized	4	5596.2
COVID non-Hospitalized	2	5599.03
COVID non-Hospitalized	3	5599.88
COVID non-Hospitalized	3	5599.88
COVID non-Hospitalized	3	5613.21
COVID non-Hospitalized	2	5613.21
COVID non-Hospitalized	3	5613.21
COVID non-Hospitalized	2	5613.21
COVID non-Hospitalized	1	5613.21
COVID non-Hospitalized	3	5613.21
COVID non-Hospitalized	4	5621.57
COVID non-Hospitalized	3	5624.55
COVID non-Hospitalized	3	5627.38
COVID non-Hospitalized	4	5635.03
COVID non-Hospitalized	4	5641.13
COVID non-Hospitalized	4	5641.13
COVID non-Hospitalized	2	5641.56
COVID non-Hospitalized	4	5641.56
COVID non-Hospitalized	2	5647.23
COVID non-Hospitalized	2	5647.23
COVID non-Hospitalized	2	5652.89
COVID non-Hospitalized	2	5662.25
COVID non-Hospitalized	2	5669.9
COVID non-Hospitalized	4	5669.9
COVID non-Hospitalized	2	5669.9
COVID non-Hospitalized	4	5669.9
COVID non-Hospitalized	3	5669.9
COVID non-Hospitalized	2	5669.9
COVID non-Hospitalized	3	5669.9
COVID non-Hospitalized	6	5674.58
COVID non-Hospitalized	4	5679.35
COVID non-Hospitalized	2	5681.24
COVID non-Hospitalized	2	5686.91
COVID non-Hospitalized	2	5692.58
COVID non-Hospitalized	2	5692.58
COVID non-Hospitalized	2	5692.58
COVID non-Hospitalized	2	5695.7
COVID non-Hospitalized	5	5698.25
COVID non-Hospitalized	2	5698.25
COVID non-Hospitalized	7	5698.25
COVID non-Hospitalized	2	5699.96
COVID non-Hospitalized	9	5705.06
COVID non-Hospitalized	4	5711.44
COVID non-Hospitalized	4	5711.44
COVID non-Hospitalized	2	5712.43
COVID non-Hospitalized	1	5712.43
COVID non-Hospitalized	2	5720.93
COVID non-Hospitalized	2	5726.6
COVID non-Hospitalized	3	5726.6
COVID non-Hospitalized	4	5726.6
COVID non-Hospitalized	6	5726.6
COVID non-Hospitalized	2	5726.6
COVID non-Hospitalized	6	5726.6
[truncated: 63,709 more rows]

## Sheet: Fig 1B
Cohort	Height in cm	age_months_height
COVID-Hospitalized	48.4971	0
COVID-Hospitalized	57.15	2
COVID-Hospitalized	65.278	5
COVID-Hospitalized	74.295	9
COVID-Hospitalized	76.2	14
COVID-Hospitalized	88.0008	21
COVID-Hospitalized	86.36	22
COVID-Hospitalized	91.44	23
COVID-Hospitalized	94.488	28
COVID-Hospitalized	43.5	0
COVID-Hospitalized	43.6101	0
COVID-Hospitalized	47.9425	1
COVID-Hospitalized	53.34	2
COVID-Hospitalized	60.3796	4
COVID-Hospitalized	66.04	7
COVID-Hospitalized	68.58	9
COVID-Hospitalized	71.12	12
COVID-Hospitalized	72.39	15
COVID-Hospitalized	78.74	18
COVID-Hospitalized	79.9998	21
COVID-Hospitalized	49.7015	0
COVID-Hospitalized	58.928	2
COVID-Hospitalized	68.58	6
COVID-Hospitalized	83.82	17
COVID-Hospitalized	88.9	25
COVID-Hospitalized	50.3767	0
COVID-Hospitalized	55.9994	2
COVID-Hospitalized	64.77	5
COVID-Hospitalized	67.0001	6
COVID-Hospitalized	46.482	0
COVID-Hospitalized	50.8	1
COVID-Hospitalized	54.61	2
COVID-Hospitalized	62.23	4
COVID-Hospitalized	66.04	7
COVID-Hospitalized	65.9994	8
COVID-Hospitalized	71.12	11
COVID-Hospitalized	73.66	14
COVID-Hospitalized	78.105	17
COVID-Hospitalized	79.756	20
COVID-Hospitalized	85.09	25
COVID-Hospitalized	50.8	0
COVID-Hospitalized	60.96	3
COVID-Hospitalized	67.31	6
COVID-Hospitalized	74.93	9
COVID-Hospitalized	74.93	10
COVID-Hospitalized	80.01	12
COVID-Hospitalized	80.01	16
COVID-Hospitalized	82.55	20
COVID-Hospitalized	48.26	0
COVID-Hospitalized	57.5005	3
COVID-Hospitalized	62.5005	5
COVID-Hospitalized	65.5003	6
COVID-Hospitalized	86.106	28
COVID-Hospitalized	48.26	0
COVID-Hospitalized	50.8	0
COVID-Hospitalized	49.53	0
COVID-Hospitalized	52.07	1
COVID-Hospitalized	58.42	2
COVID-Hospitalized	59.436	4
COVID-Hospitalized	66.04	6
COVID-Hospitalized	70.485	9
COVID-Hospitalized	75.565	13
COVID-Hospitalized	81.28	18
COVID-Hospitalized	81.7042	20
COVID-Hospitalized	84.0003	24
COVID-Hospitalized	50.3796	0
COVID-Hospitalized	53.34	1
COVID-Hospitalized	56.515	2
COVID-Hospitalized	61.595	5
COVID-Hospitalized	62.992	6
COVID-Hospitalized	66.04	7
COVID-Hospitalized	68.58	9
COVID-Hospitalized	73.66	12
COVID-Hospitalized	78.74	15
COVID-Hospitalized	78.9	16
COVID-Hospitalized	81.28	21
COVID-Hospitalized	86.36	23
COVID-Hospitalized	46.736	0
COVID-Hospitalized	52.07	1
COVID-Hospitalized	55.245	2
COVID-Hospitalized	59.4004	4
COVID-Hospitalized	62.23	5
COVID-Hospitalized	64.77	7
COVID-Hospitalized	69.85	9
COVID-Hospitalized	71.12	13
COVID-Hospitalized	71.0006	14
COVID-Hospitalized	45.56	0
COVID-Hospitalized	51.0007	1
COVID-Hospitalized	58.42	2
COVID-Hospitalized	70.485	7
COVID-Hospitalized	175.768	9
COVID-Hospitalized	75.9993	14
COVID-Hospitalized	78.0009	15
COVID-Hospitalized	77.8002	16
COVID-Hospitalized	78.9991	21
COVID-Hospitalized	47.9425	0
COVID-Hospitalized	49.53	1
COVID-Hospitalized	55.88	2
COVID-Hospitalized	64.5008	4
COVID-Hospitalized	66.04	6
COVID-Hospitalized	65.9994	9
COVID-Hospitalized	68.58	12
COVID-Hospitalized	76.2	19
COVID-Hospitalized	48.895	0
COVID-Hospitalized	51.0007	0
COVID-Hospitalized	47.4955	0
COVID-Hospitalized	50.8	1
COVID-Hospitalized	58.42	2
COVID-Hospitalized	60.96	4
COVID-Hospitalized	67.0001	7
COVID-Hospitalized	69.4995	10
COVID-Hospitalized	75.0011	13
COVID-Hospitalized	79.9998	17
COVID-Hospitalized	81.28	19
COVID-Hospitalized	46.99	0
COVID-Hospitalized	54.61	1
COVID-Hospitalized	60.96	2
COVID-Hospitalized	59.4995	3
COVID-Hospitalized	63.5	4
COVID-Hospitalized	68.072	6
COVID-Hospitalized	70.4012	9
COVID-Hospitalized	72.4002	10
COVID-Hospitalized	76.2	12
COVID-Hospitalized	81.788	18
COVID-Hospitalized	47.4955	0
COVID-Hospitalized	51.1988	1
COVID-Hospitalized	55.1993	2
COVID-Hospitalized	60.96	3
COVID-Hospitalized	69.215	6
COVID-Hospitalized	82.4992	16
COVID-Hospitalized	42.625	0
COVID-Hospitalized	45.8526	1
COVID-Hospitalized	49.8678	2
COVID-Hospitalized	55.1993	3
COVID-Hospitalized	57.4023	4
COVID-Hospitalized	61.595	6
COVID-Hospitalized	67.818	10
COVID-Hospitalized	68.4251	11
COVID-Hospitalized	71.12	12
COVID-Hospitalized	71.9988	13
COVID-Hospitalized	74.168	16
COVID-Hospitalized	77.47	18
COVID-Hospitalized	47.0002	0
COVID-Hospitalized	52.324	1
COVID-Hospitalized	52.832	2
COVID-Hospitalized	60.198	4
COVID-Hospitalized	47.1763	0
COVID-Hospitalized	49.9999	1
COVID-Hospitalized	55.0012	2
COVID-Hospitalized	62.9996	4
COVID-Hospitalized	65.9994	6
COVID-Hospitalized	66.04	7
COVID-Hospitalized	72.9996	9
COVID-Hospitalized	75.9993	12
COVID-Hospitalized	81.9988	15
COVID-Hospitalized	45.72	0
COVID-Hospitalized	52.9565	1
COVID-Hospitalized	58.4098	2
COVID-Hospitalized	62.23	4
COVID-Hospitalized	65.499	6
COVID-Hospitalized	66.04	7
COVID-Hospitalized	69.85	10
COVID-Hospitalized	69.85	11
COVID-Hospitalized	75.1992	14
COVID-Hospitalized	74.295	15
COVID-Hospitalized	76.4997	16
COVID-Hospitalized	43.18	0
COVID-Hospitalized	51.308	1
COVID-Hospitalized	55.88	2
COVID-Hospitalized	62.992	4
COVID-Hospitalized	68.58	6
COVID-Hospitalized	73.66	10
COVID-Hospitalized	76.2	12
COVID-Hospitalized	50.5003	0
COVID-Hospitalized	50.8	0
COVID-Hospitalized	50.8	0
COVID-Hospitalized	60.96	3
COVID-Hospitalized	66.04	6
COVID-Hospitalized	48.0009	0
COVID-Hospitalized	52.705	1
COVID-Hospitalized	55.88	2
COVID-Hospitalized	60.96	4
COVID-Hospitalized	63.5	6
COVID-Hospitalized	72.39	11
COVID-Hospitalized	73.6041	12
COVID-Hospitalized	49.53	0
COVID-Hospitalized	45.4025	0
COVID-Hospitalized	53.34	1
COVID-Hospitalized	54.61	2
COVID-Hospitalized	61.1988	4
COVID-Hospitalized	67.056	6
COVID-Hospitalized	69.9999	8
COVID-Hospitalized	71.12	9
COVID-Hospitalized	45.72	0
COVID-Hospitalized	49.2493	0
COVID-Hospitalized	51.0007	1
COVID-Hospitalized	55.499	2
COVID-Hospitalized	59.45	4
COVID-Hospitalized	60.5003	5
COVID-Hospitalized	64.5008	7
COVID-Hospitalized	68.9991	11
COVID-Hospitalized	44.9999	0
COVID-Hospitalized	48.26	1
COVID-Hospitalized	53.34	2
COVID-Hospitalized	47.6275	0
COVID-Hospitalized	55.88	1
COVID-Hospitalized	58.42	2
COVID-Hospitalized	64.008	4
COVID-Hospitalized	68.58	7
COVID-Hospitalized	74.168	9
COVID-Hospitalized	49.53	0
COVID-Hospitalized	54.61	1
COVID-Hospitalized	59.69	2
COVID-Hospitalized	64.77	5
COVID-Hospitalized	71.12	7
COVID-Hospitalized	51.1175	0
COVID-Hospitalized	57.15	1
COVID-Hospitalized	60.96	3
COVID-Hospitalized	73.66	6
COVID-Hospitalized	48.1965	0
COVID-Hospitalized	53.8048	1
COVID-Hospitalized	55.88	2
COVID-Hospitalized	62.992	5
COVID-Hospitalized	65.405	7
COVID-Hospitalized	45.72	0
COVID-Hospitalized	48.4797	1
COVID-Hospitalized	54.61	2
COVID-Hospitalized	58.42	4
COVID-Hospitalized	63.5	7
COVID-	52.0463	0
COVID-	55.88	1
COVID-	62.484	2
COVID-	64.77	4
COVID-	68.58	7
COVID-	75.184	10
COVID-	81.28	12
COVID-	84.836	15
COVID-	86.36	19
COVID-	92.964	25
COVID-	98.044	34
COVID-	50.9003	0
COVID-	53.34	0
COVID-	54.61	1
COVID-	62.9996	3
COVID-	67.31	6
COVID-	68.58	7
COVID-	71.12	10
COVID-	75.565	12
COVID-	81.28	16
COVID-	85.4989	19
COVID-	86.995	24
COVID-	48.7566	0
COVID-	59.69	2
COVID-	49.53	0
COVID-	69.85	7
COVID-	74.168	10
COVID-	74.676	12
COVID-	77.216	16
COVID-	81.28	20
COVID-	86.36	25
COVID-	91.44	31
COVID-	46.99	0
COVID-	52.4993	0
COVID-	87.884	21
COVID-	90.932	27
COVID-	96.52	33
COVID-	49.53	0
COVID-	48.895	0
COVID-	52.324	1
COVID-	56.896	2
COVID-	62.484	4
COVID-	66.675	7
COVID-	71.12	9
COVID-	74.93	12
COVID-	78.74	15
COVID-	82.55	19
COVID-	85.4989	25
COVID-	92.71	32
COVID-	51.7525	0
COVID-	60.325	2
COVID-	68.5013	4
COVID-	67.31	5
COVID-	72.136	6
COVID-	52.07	0
COVID-	49.8742	0
COVID-	58.9991	2
COVID-	66.04	4
COVID-	78.74	12
COVID-	50.5003	0
COVID-	49.53	0
COVID-	47.4133	0
COVID-	50.8	1
COVID-	60.96	3
COVID-	67.31	5
COVID-	69.85	8
COVID-	73.66	11
COVID-	74.93	14
COVID-	82.55	20
COVID-	86.36	25
COVID-	92.9996	32
COVID-	93.98	34
COVID-	48.895	0
COVID-	48.26	0
COVID-	52.07	1
COVID-	58.0009	2
COVID-	64.77	4
COVID-	68.58	6
COVID-	48.0009	0
COVID-	48.895	0
COVID-	59.69	2
COVID-	64.77	4
COVID-	68.58	7
COVID-	77.47	11
COVID-	78.74	12
COVID-	97.79	33
COVID-	51.1387	0
COVID-	59.69	2
COVID-	66.04	4
COVID-	73.025	6
COVID-	77.724	9
COVID-	81.28	16
COVID-	92.456	25
COVID-	97.0001	33
COVID-	31.3703	0
COVID-	35.0004	1
COVID-	38.6673	2
COVID-	44.8755	3
COVID-	53.975	4
COVID-	59.4995	5
COVID-	59.8653	6
COVID-	59.9999	7
COVID-	72.39	11
COVID-	78.74	16
COVID-	52.0344	0
COVID-	55.88	1
COVID-	58.9991	2
COVID-	62.4992	4
COVID-	67.0001	6
COVID-	72.39	10
COVID-	73.66	13
COVID-	78.74	15
COVID-	81.9988	19
COVID-	87.0001	23
COVID-	86.9975	25
COVID-	88.0008	26
COVID-	89.4994	28
COVID-	90.2005	30
COVID-	46.9968	0
COVID-	87.0001	23
COVID-	52.5602	0
COVID-	58.928	2
COVID-	68.9991	6
COVID-	75.499	10
COVID-	85.0011	17
COVID-	86.36	20
COVID-	87.63	24
COVID-	87.5995	25
COVID-	87.0001	27
COVID-	87.63	30
COVID-	48.4717	0
COVID-	50.8	1
COVID-	57.5005	2
COVID-	62.23	4
COVID-	67.31	6
COVID-	69.85	10
COVID-	73.66	12
COVID-	77.47	15
COVID-	83.82	25
COVID-	45.085	0
COVID-	55.88	2
COVID-	66.04	4
COVID-	71.12	6
COVID-	71.12	7
COVID-	71.755	9
COVID-	77.47	13
COVID-	75.499	14
COVID-	83.82	16
COVID-	85.09	20
COVID-	79.9998	21
COVID-	83.5	22
COVID-	85.9993	25
COVID-	95.25	32
COVID-	93.4999	34
COVID-	32.6161	0
COVID-	59.055	3
COVID-	65.0011	4
COVID-	68.58	6
COVID-	74.93	9
COVID-	77.47	12
COVID-	81.915	15
COVID-	86.995	19
COVID-	87.63	21
COVID-	91.0006	25
COVID-	95.25	31
COVID-	48.26	0
COVID-	54.102	2
COVID-	62.23	4
COVID-	66.04	6
COVID-	71.12	11
COVID-	73.66	13
COVID-	76.2	16
COVID-	80.01	20
COVID-	84.0003	24
COVID-	88.9	31
COVID-	89.9998	34
COVID-	47.3075	0
COVID-	57.15	2
COVID-	60.96	4
COVID-	63.5	5
COVID-	68.7896	7
COVID-	74.1299	10
COVID-	76.2	11
COVID-	76.7994	13
COVID-	73.66	14
COVID-	78.7197	15
COVID-	81.28	19
COVID-	82.4992	21
COVID-	85.725	22
COVID-	84.0003	24
COVID-	86.4299	25
COVID-	89.535	31
COVID-	91.44	35
COVID-	43.18	0
COVID-	68.58	26
COVID-	48.6833	0
COVID-	78.74	15
COVID-	78.74	17
COVID-	88.9	25
COVID-	92.9996	31
COVID-	44.1672	0
COVID-	47.9304	1
COVID-	52.9996	2
COVID-	55.5003	3
COVID-	50.9003	0
COVID-	57.15	2
COVID-	64.77	4
COVID-	67.31	7
COVID-	78.74	15
COVID-	83.5	20
COVID-	87.5005	24
COVID-	95.25	33
COVID-	50.4825	0
COVID-	47.625	0
COVID-	55.118	2
COVID-	63.5	4
COVID-	67.945	6
COVID-	74.93	11
COVID-	76.2	13
COVID-	77.47	15
COVID-	83.82	20
COVID-	90.17	27
COVID-	49.8475	0
COVID-	53.975	1
COVID-	54.0004	4
COVID-	66.04	6
COVID-	67.31	7
COVID-	76.2	11
COVID-	76.2	12
COVID-	78.74	19
COVID-	81.28	24
COVID-	51.5353	0
COVID-	59.055	2
COVID-	67.056	5
COVID-	71.628	8
COVID-	79.502	12
COVID-	83.82	16
COVID-	92.71	26
COVID-	49.2011	0
COVID-	53.8455	1
COVID-	54.8729	2
COVID-	56.7995	3
COVID-	67.0001	5
COVID-	68.58	6
COVID-	71.0006	8
COVID-	72.9996	9
COVID-	74.93	12
COVID-	75.9993	13
COVID-	80.5002	14
COVID-	80.645	15
COVID-	81.9988	17
COVID-	84.5007	18
COVID-	84.0003	20
COVID-	85.3999	21
COVID-	87.0001	23
COVID-	89.9008	25
COVID-	94.0003	26
COVID-	94.0003	27
COVID-	91.9988	29
COVID-	49.53	0
COVID-	0
COVID-	52.4205	0
COVID-	69.85	6
COVID-	73.66	10
COVID-	77.47	12
COVID-	88.9	19
COVID-	88.9	20
COVID-	88.9	22
COVID-	88.9	23
COVID-	88.9	24
COVID-	96.52	31
COVID-	101.001	34
COVID-	101.999	35
COVID-	52.6504	0
COVID-	50.8	0
COVID-	48.448	0
COVID-	49.53	1
COVID-	55.88	2
COVID-	63.5	4
COVID-	67.31	7
COVID-	74.93	13
COVID-	73.66	14
COVID-	86.36	18
COVID-	86.36	27
COVID-	50.1498	0
COVID-	89.9998	21
COVID-	28.4988	0
COVID-	48.6296	0
COVID-	49.2125	0
COVID-	53.34	1
COVID-	57.785	2
COVID-	62.4992	5
COVID-	66.04	7
COVID-	72.9996	10
COVID-	75.0011	13
COVID-	75.0011	15
COVID-	50.1536	0
COVID-	56.388	2
COVID-	60.96	4
COVID-	69.85	7
COVID-	46.99	0
COVID-	53.34	2
COVID-	60.96	4
COVID-	77.47	17
COVID-	87.0001	28
COVID-	46.355	0
COVID-	54.61	2
COVID-	61.595	4
COVID-	65.024	6
COVID-	68.58	9
COVID-	76.2	13
COVID-	78.74	15
COVID-	81.28	19
COVID-	91.9988	24
COVID-	96.52	30
COVID-	50.7763	0
COVID-	57.15	2
COVID-	62.23	3
COVID-	68.58	5
COVID-	71.12	7
COVID-	74.93	10
COVID-	78.74	12
COVID-	78.74	16
COVID-	83.82	19
COVID-	90.17	24
COVID-	99.9998	32
COVID-	98.999	34
COVID-	49.53	0
COVID-	50.7898	0
COVID-	60.96	2
COVID-	64.008	4
COVID-	67.818	6
COVID-	78.74	14
COVID-	86.36	20
COVID-	90.17	25
COVID-	49.1084	0
COVID-	72.644	9
COVID-	75.184	12
COVID-	78.74	13
COVID-	81.1479	15
COVID-	82.55	16
COVID-	85.09	19
COVID-	98.0008	25
COVID-	92.71	28
COVID-	94.615	29
COVID-	99.9998	35
COVID-	42.9683	0
COVID-	52.07	3
COVID-	61.595	6
COVID-	66.04	8
COVID-	67.0001	10
COVID-	71.12	12
COVID-	78.74	19
COVID-	81.28	25
COVID-	85.9993	32
COVID-	91.44	33
COVID-	52.705	0
COVID-	52.07	1
COVID-	57.15	2
COVID-	64.77	4
COVID-	68.58	6
COVID-	72.39	10
COVID-	76.2	12
COVID-	78.74	16
COVID-	83.82	18
COVID-	83.82	19
COVID-	86.3803	25
COVID-	91.44	31
COVID-	49.3183	0
COVID-	53.34	1
COVID-	56.642	2
COVID-	60.96	4
COVID-	65.024	7
COVID-	72.136	12
COVID-	86.36	26
COVID-	49.2633	0
COVID-	55.245	2
COVID-	67.0001	4
COVID-	71.0006	6
COVID-	75.499	9
COVID-	77.0001	12
COVID-	80.3694	13
COVID-	50.8	0
COVID-	48.2448	0
COVID-	67.31	8
COVID-	83.82	23
COVID-	84.0003	27
COVID-	48.26	0
COVID-	52.0827	0
COVID-	58.0009	2
COVID-	62.23	3
COVID-	65.405	4
COVID-	49.53	0
COVID-	46.99	0
COVID-	51.4485	0
COVID-	57.404	2
COVID-	64.77	4
COVID-	67.564	6
COVID-	73.152	9
COVID-	81.28	14
COVID-	80.772	17
COVID-	81.915	20
COVID-	88.9	25
COVID-	51.9989	0
COVID-	46.355	0
COVID-	53.34	1
COVID-	57.15	2
COVID-	60.96	5
COVID-	51.0007	0
COVID-	49.13	0
COVID-	52.07	1
COVID-	57.15	2
COVID-	62.9996	5
COVID-	68.9991	6
COVID-	74.93	9
COVID-	77.0001	12
COVID-	78.0009	15
COVID-	85.0011	19
COVID-	85.9993	24
COVID-	87.0001	26
COVID-	48.5153	0
COVID-	56.515	2
COVID-	65.0011	5
COVID-	69.4995	7
COVID-	73.025	11
COVID-	77.0001	13
COVID-	78.0009	16
COVID-	83.312	20
COVID-	88.5012	27
COVID-	93.9013	34
COVID-	48.26	0
COVID-	57.0001	2
COVID-	68.58	6
COVID-	81.28	17
COVID-	48.387	0
COVID-	58.42	2
COVID-	79.248	14
COVID-	83.82	17
COVID-	93.98	31
COVID-	45.72	0
COVID-	56.515	3
COVID-	62.23	5
COVID-	66.04	8
COVID-	73.66	13
COVID-	76.2	17
COVID-	81.28	26
COVID-	45.72	0
COVID-	77.47	15
COVID-	83.82	21
COVID-	81.501	26
COVID-	51.0007	0
COVID-	43.7269	0
COVID-	55.118	2
COVID-	71.12	7
COVID-	76.708	10
COVID-	81.28	15
COVID-	50.8	0
COVID-	49.9999	0
COVID-	52.07	0
COVID-	54.61	1
COVID-	57.15	2
COVID-	64.516	4
COVID-	63.754	6
COVID-	71.882	9
COVID-	76.708	12
COVID-	82.55	16
COVID-	87.63	21
COVID-	89.535	24
COVID-	93.98	31
COVID-	51.5353	0
COVID-	59.69	2
COVID-	66.675	4
COVID-	73.025	6
COVID-	71.9988	7
COVID-	77.47	9
COVID-	85.725	13
COVID-	85.725	15
COVID-	91.44	19
COVID-	91.44	22
COVID-	94.615	25
COVID-	97.0001	27
COVID-	50.8	0
COVID-	53.34	1
COVID-	58.42	3
COVID-	63.5	5
COVID-	68.58	7
COVID-	71.12	9
COVID-	73.66	12
COVID-	81.28	21
COVID-	85.09	24
COVID-	86.36	27
COVID-	51.8346	0
COVID-	58.42	2
COVID-	65.0011	5
COVID-	68.58	7
COVID-	76.2	12
COVID-	78.74	16
COVID-	81.28	18
COVID-	83.82	19
COVID-	52.4933	0
COVID-	58.42	2
COVID-	62.484	4
COVID-	68.58	6
COVID-	76.708	12
COVID-	82.55	17
COVID-	87.376	21
COVID-	91.44	25
COVID-	92.075	31
COVID-	50.9676	0
COVID-	55.88	2
COVID-	63.5	5
COVID-	66.04	6
COVID-	68.58	9
COVID-	73.66	13
COVID-	78.74	16
COVID-	49.4995	0
COVID-	51.9989	0
COVID-	48.3794	0
COVID-	55.245	2
COVID-	61.9125	6
COVID-	68.58	11
COVID-	72.39	12
COVID-	76.2	16
COVID-	79.0575	19
COVID-	83.82	21
COVID-	83.82	22
COVID-	88.9	26
COVID-	90.2005	30
COVID-	50.8	0
COVID-	60.325	2
COVID-	66.675	4
COVID-	47.6597	0
COVID-	56.1696	1
COVID-	58.42	2
COVID-	59.9999	4
COVID-	63.5	5
COVID-	69.9999	6
COVID-	68.0009	7
COVID-	70.7898	8
COVID-	74.1307	9
COVID-	82.8497	12
COVID-	79.248	15
COVID-	82.55	19
COVID-	89.535	25
COVID-	93.98	30
COVID-	48.768	0
COVID-	53.2371	1
COVID-	55.0012	2
COVID-	70.5002	7
COVID-	51.9989	0
COVID-	70.5002	6
COVID-	73.5508	15
COVID-	75.692	17
COVID-	75.9993	18
COVID-	49.1761	0
COVID-	91.44	25
COVID-	91.44	28
COVID-	98.999	31
COVID-	51.1499	0
COVID-	53.6575	1
COVID-	59.055	2
COVID-	67.31	4
COVID-	71.12	6
COVID-	73.66	9
COVID-	78.0009	12
COVID-	82.2744	15
COVID-	87.5005	19
COVID-	89.9998	21
COVID-	90.5002	24
COVID-	90.5002	25
COVID-	50.2768	0
COVID-	53.34	1
COVID-	64.77	5
COVID-	67.945	7
COVID-	71.12	9
COVID-	76.2	14
COVID-	77.47	16
COVID-	80.01	19
COVID-	80.01	21
COVID-	83.82	24
COVID-	88.0008	32
COVID-	52.2817	0
COVID-	57.15	1
COVID-	59.69	2
COVID-	67.31	4
COVID-	72.39	6
COVID-	76.2	9
COVID-	81.28	12
COVID-	87.63	15
COVID-	90.5002	19
COVID-	95.25	25
COVID-	100.33	32
COVID-	52.1703	0
COVID-	55.88	1
COVID-	71.12	6
COVID-	71.6001	10
COVID-	75.9993	12
COVID-	78.5012	13
COVID-	87.2007	24
COVID-	46.99	0
COVID-	45.72	0
COVID-	73.66	14
COVID-	50.1498	0
COVID-	60.96	2
COVID-	61.0006	3
COVID-	66.04	4
COVID-	71.12	6
COVID-	73.66	9
COVID-	79.375	12
COVID-	81.915	16
COVID-	85.09	19
COVID-	46.99	0
COVID-	46.5667	0
COVID-	61.9989	3
COVID-	63.5	4
COVID-	66.04	6
COVID-	72.39	9
COVID-	76.2	12
COVID-	83.82	17
COVID-	87.0001	20
COVID-	90.5002	25
COVID-	50.9003	0
COVID-	55.88	1
COVID-	58.674	2
COVID-	61.0006	3
COVID-	72.644	5
COVID-	71.628	6
COVID-	73.66	9
COVID-	78.105	12
COVID-	81.28	17
COVID-	81.28	20
COVID-	83.82	21
COVID-	92.4001	24
COVID-	99.06	32
COVID-	42.5221	0
COVID-	53.848	2
COVID-	90.17	25
COVID-	51.9989	0
COVID-	48.6296	0
COVID-	50.8	1
COVID-	58.9991	3
COVID-	63.5	4
COVID-	71.0006	7
COVID-	75.0011	9
COVID-	81.0006	12
COVID-	78.74	15
COVID-	85.9993	19
COVID-	52.705	0
COVID-	48.26	0
COVID-	50.8	0
COVID-	59.69	2
COVID-	65.499	3
COVID-	69.596	5
COVID-	71.628	7
COVID-	76.2	10
COVID-	92.456	25
COVID-	92.456	26
COVID-	48.26	0
COVID-	49.53	0
COVID-	56.388	2
COVID-	67.31	6
COVID-	77.47	12
COVID-	48.6899	0
COVID-	55.0012	2
COVID-	57.0001	3
COVID-	62.9996	4
COVID-	65.499	6
COVID-	69.85	9
COVID-	74.5007	12
COVID-	78.9965	13
COVID-	80.5002	18
COVID-	80.645	20
COVID-	80.5002	23
COVID-	83.82	25
COVID-	88.9	30
COVID-	87.8002	32
COVID-	48.895	0
COVID-	66.04	5
COVID-	68.58	6
COVID-	73.66	9
COVID-	75.184	12
COVID-	83.185	19
COVID-	91.44	27
COVID-	49.4199	0
COVID-	55.88	2
COVID-	60.96	4
COVID-	65.0011	6
COVID-	71.12	10
COVID-	77.249	13
COVID-	87.5005	24
COVID-	93.98	31
COVID-	49.53	0
COVID-	55.88	2
COVID-	59.69	3
COVID-	63.5	4
COVID-	68.58	6
COVID-	71.12	9
COVID-	76.2	12
COVID-	79.248	14
COVID-	81.28	15
COVID-	84.328	18
COVID-	88.265	24
COVID-	91.44	31
COVID-	95.504	32
COVID-	105.41	34
COVID-	50.8	0
COVID-	61.0006	2
COVID-	64.0004	4
COVID-	71.0006	7
COVID-	78.5012	10
COVID-	77.47	12
COVID-	77.47	13
COVID-	88.0008	25
COVID-	37.7501	0
COVID-	40.894	1
COVID-	46.3601	2
COVID-	47.0002	3
COVID-	50.8	4
COVID-	58.42	8
COVID-	64.0004	11
COVID-	67.31	13
COVID-	73.66	17
COVID-	75.565	20
COVID-	78.105	24
COVID-	80.5002	27
COVID-	84.0003	30
COVID-	48.6296	0
COVID-	60.96	3
COVID-	63.5	5
COVID-	71.12	7
COVID-	73.66	9
COVID-	81.026	13
COVID-	81.28	15
COVID-	86.36	21
COVID-	89.9998	24
COVID-	53.1698	0
COVID-	62.23	2
COVID-	71.12	5
COVID-	72.39	7
COVID-	75.565	10
COVID-	80.01	15
COVID-	84.7281	17
COVID-	86.36	20
COVID-	92.075	27
COVID-	96.52	33
COVID-	48.9991	0
COVID-	46.99	0
COVID-	52.5467	0
COVID-	48.26	0
COVID-	64.5008	8
COVID-	75.9993	14
COVID-	77.5005	17
COVID-	84.201	25
COVID-	84.0003	28
COVID-	84.0003	30
COVID-	87.0001	33
COVID-	45.72	0
COVID-	53.34	2
COVID-	58.42	5
COVID-	66.04	7
COVID-	71.12	13
COVID-	81.9988	24
COVID-	91.44	34
COVID-	45.6982	0
COVID-	49.4995	1
COVID-	55.88	2
COVID-	62.3011	4
COVID-	66.04	6
COVID-	69.9999	9
COVID-	76.2	13
COVID-	81.28	16
COVID-	81.28	18
COVID-	86.36	25
COVID-	92.4992	31
COVID-	49.53	0
COVID-	82.804	19
COVID-	48.895	0
COVID-	57.15	2
COVID-	61.595	4
COVID-	68.58	7
COVID-	72.39	9
COVID-	75.565	13
COVID-	80.01	16
COVID-	80.645	19
COVID-	87.63	26
COVID-	90.17	31
COVID-	49.4453	0
COVID-	56.896	2
COVID-	62.23	4
COVID-	71.12	6
COVID-	72.644	12
COVID-	77.216	16
COVID-	81.28	19
COVID-	81.915	24
COVID-	85.09	30
COVID-	48.26	0
COVID-	56.388	2
COVID-	62.23	4
COVID-	67.31	6
COVID-	71.12	9
COVID-	72.136	12
COVID-	80.264	16
COVID-	81.28	18
COVID-	83.82	24
COVID-	86.868	30
COVID-	86.36	31
COVID-	48.26	0
COVID-	49.53	1
COVID-	57.15	2
COVID-	62.23	4
COVID-	66.04	6
COVID-	68.58	9
COVID-	73.66	12
COVID-	81.28	16
COVID-	83.82	19
COVID-	91.44	24
COVID-	93.9495	31
COVID-	100.433	32
COVID-	96.4006	33
COVID-	50.8	0
COVID-	37.7508	0
COVID-	96.52	20
COVID-	92.4992	31
COVID-	50.8	0
COVID-	62.23	2
COVID-	67.31	4
COVID-	69.85	6
COVID-	72.39	9
COVID-	77.47	12
COVID-	81.28	16
COVID-	83.82	19
COVID-	87.63	24
COVID-	90.17	31
COVID-	49.4005	0
COVID-	69.85	7
COVID-	71.12	9
COVID-	48.9991	0
COVID-	63.5	2
COVID-	72.39	7
COVID-	80.01	12
COVID-	85.09	19
COVID-	86.36	25
COVID-	50.8	0
COVID-	49.3395	0
COVID-	57.15	2
COVID-	64.135	4
COVID-	67.945	6
COVID-	74.93	10
COVID-	76.2	13
COVID-	85.09	20
COVID-	91.44	25
COVID-	51.0007	0
COVID-	73.66	10
COVID-	74.0004	11
COVID-	78.0009	13
COVID-	87.0001	22
COVID-	85.5993	25
COVID-	47.625	0
COVID-	52.3562	0
COVID-	55.0012	2
COVID-	43.5	0
COVID-	52.6627	0
COVID-	63.5	2
COVID-	68.58	4
COVID-	73.66	7
COVID-	87.63	18
COVID-	50.9003	0
COVID-	58.42	2
COVID-	61.9989	3
COVID-	64.77	4
COVID-	71.12	6
COVID-	74.0004	7
COVID-	73.3298	9
COVID-	76.2	12
COVID-	80.01	15
COVID-	85.09	19
COVID-	88.9	22
COVID-	92.71	24
COVID-	92.4035	28
COVID-	90.17	30
COVID-	94.201	31
COVID-	97.2998	33
COVID-	49.53	0
COVID-	48.895	1
COVID-	57.15	2
COVID-	68.58	6
COVID-	73.66	8
COVID-	75.565	9
COVID-	78.74	12
COVID-	88.9	18
COVID-	88.9	21
COVID-	92.71	25
COVID-	96.52	30
COVID-	52.4933	0
COVID-	60.96	2
COVID-	67.31	4
COVID-	45.72	0
COVID-	48.26	0
COVID-	0
COVID-	51.4248	0
COVID-	59.055	2
COVID-	64.77	4
COVID-	74.93	8
COVID-	78.74	12
COVID-	82.55	16
COVID-	88.9	22
COVID-	91.44	25
COVID-	49.53	0
COVID-	83.82	31
COVID-	45.72	0
COVID-	50.8	0
COVID-	52.4993	1
COVID-	57.15	2
COVID-	64.77	4
COVID-	70.485	6
COVID-	74.93	9
COVID-	80.645	12
COVID-	81.28	15
COVID-	84.455	19
COVID-	88.5012	25
COVID-	92.9996	30
COVID-	52.0344	0
COVID-	57.15	1
COVID-	59.69	2
COVID-	66.04	4
COVID-	82.55	19
COVID-	96.52	34
COVID-	48.1965	0
COVID-	53.34	1
COVID-	55.88	2
COVID-	67.945	6
COVID-	68.58	7
COVID-	73.66	9
COVID-	77.978	14
COVID-	76.2	15
COVID-	81.915	18
COVID-	93.98	24
COVID-	96.52	31
COVID-	46.99	0
COVID-	58.42	3
COVID-	64.77	6
COVID-	64.77	7
COVID-	73.66	13
COVID-	78.74	16
COVID-	83.82	19
COVID-	88.392	26
COVID-	91.44	32
COVID-	51.2665	0
COVID-	52.2491	1
COVID-	58.0009	2
COVID-	67.31	6
COVID-	68.9991	8
COVID-	75.499	13
COVID-	77.5005	16
COVID-	81.28	19
COVID-	84.0003	22
COVID-	84.6988	24
COVID-	85.0011	26
COVID-	93.218	32
COVID-	48.6664	0
COVID-	49.9999	1
COVID-	55.0012	2
COVID-	61.0006	4
COVID-	68.9991	8
COVID-	72.9996	10
COVID-	75.565	15
COVID-	50.3335	0
COVID-	52.705	1
COVID-	56.4998	2
COVID-	62.865	4
COVID-	68.0009	6
COVID-	71.0006	9
COVID-	72.9996	10
COVID-	75.0011	12
COVID-	77.0001	13
COVID-	77.5005	15
COVID-	83.82	18
COVID-	88.265	24
COVID-	96.1009	31
COVID-	49.2125	0
COVID-	56.642	2
COVID-	63.5	4
COVID-	66.04	6
COVID-	73.152	12
COVID-	77.47	14
COVID-	80.645	17
COVID-	83.82	20
COVID-	87.63	24
COVID-	92.075	31
COVID-	50.4977	0
COVID-	46.355	0
COVID-	57.15	2
COVID-	66.04	5
COVID-	63.5	6
COVID-	71.12	9
COVID-	76.2	12
COVID-	78.74	15
COVID-	81.915	18
COVID-	85.1992	21
COVID-	91.44	24
COVID-	96.52	31
COVID-	35.499	0
COVID-	40.1	1
COVID-	43.815	2
COVID-	52.07	3
COVID-	54.864	4
COVID-	67.0001	6
COVID-	66.4997	7
COVID-	71.12	10
COVID-	74.93	12
COVID-	48.0009	0
COVID-	93.98	33
COVID-	48.4988	0
COVID-	48.9991	0
COVID-	45.212	0
COVID-	55.88	2
COVID-	63.5	4
COVID-	67.5005	5
COVID-	69.85	6
COVID-	69.9999	7
COVID-	72.4992	8
COVID-	76.4997	11
COVID-	76.4997	17
COVID-	49.53	0
COVID-	50.8	0
COVID-	47.4713	0
COVID-	55.88	2
COVID-	60.325	4
COVID-	64.77	7
COVID-	69.85	9
COVID-	74.295	13
COVID-	76.962	15
COVID-	81.0006	18
COVID-	51.2233	0
COVID-	58.42	2
COVID-	76.2	8
COVID-	85.09	20
COVID-	90.17	25
COVID-	91.9988	31
COVID-	51.5993	0
COVID-	54.61	1
COVID-	59.055	2
COVID-	63.5	5
COVID-	68.58	6
COVID-	72.39	9
COVID-	76.2	12
COVID-	78.74	15
COVID-	76.2	17
COVID-	81.28	18
COVID-	82.55	24
COVID-	87.63	31
COVID-	91.9988	34
COVID-	40.0196	0
COVID-	52.9996	2
COVID-	51.0007	0
COVID-	50.6501	0
COVID-	55.88	2
COVID-	62.23	5
COVID-	67.818	7
COVID-	71.501	9
COVID-	73.66	12
COVID-	76.708	15
COVID-	84.836	19
COVID-	84.8004	21
COVID-	88.9	27
COVID-	91.948	32
COVID-	91.948	34
COVID-	47.498	0
COVID-	74.93	13
COVID-	78.74	14
COVID-	77.47	15
COVID-	82.55	18
COVID-	88.9	20
COVID-	91.44	21
COVID-	86.36	23
COVID-	88.9	25
COVID-	91.6263	26
COVID-	92.3011	27
COVID-	97.79	28
COVID-	92.71	29
COVID-	95.123	30
COVID-	93.98	31
COVID-	97.8954	34
COVID-	51.1023	0
COVID-	62.23	3
COVID-	85.09	17
COVID-	96.4997	32
COVID-	44.334	0
COVID-	78.74	20
COVID-	45.72	0
COVID-	49.9999	1
COVID-	54.61	2
COVID-	62.23	4
COVID-	65.9994	7
COVID-	68.58	9
COVID-	75.0011	14
COVID-	75.9993	16
COVID-	78.74	17
COVID-	79.9998	18
COVID-	88.9	34
COVID-	49.298	0
COVID-	63.5	3
COVID-	52.07	0
COVID-	53.34	1
COVID-	60.96	2
COVID-	60.96	4
COVID-	64.77	5
COVID-	69.9999	7
COVID-	73.0123	9
COVID-	78.0009	15
COVID-	78.74	16
COVID-	45.72	0
COVID-	53.34	2
COVID-	48.26	0
COVID-	50.3767	0
COVID-	58.42	2
COVID-	51.435	0
COVID-	48.895	0
COVID-	50.8	2
COVID-	61.0006	3
COVID-	71.9988	7
COVID-	74.0994	8
COVID-	69.9999	9
COVID-	78.0009	13
COVID-	97.5004	34
COVID-	53.34	0
COVID-	60.96	2
COVID-	67.31	4
COVID-	73.025	7
COVID-	73.66	9
COVID-	76.2	13
COVID-	81.28	16
COVID-	83.82	20
COVID-	88.9	23
COVID-	99.568	34
COVID-	41.667	0
COVID-	42.5894	1
COVID-	47.752	2
COVID-	54.61	4
COVID-	57.0001	5
COVID-	61.214	7
COVID-	60.96	8
COVID-	68.58	10
COVID-	71.755	13
COVID-	77.0001	15
COVID-	75.9993	18
COVID-	76.2	20
COVID-	82.55	27
COVID-	83.82	32
COVID-	48.3489	0
COVID-	57.0001	2
COVID-	66.0006	5
COVID-	69.6684	6
COVID-	30.6254	0
COVID-	35.6001	1
COVID-	40.8743	2
COVID-	46	3
COVID-	51.4995	4
COVID-	53.9999	5
COVID-	57.7507	6
COVID-	68.0009	9
COVID-	67.31	10
COVID-	73.5	16
COVID-	88.7501	30
COVID-	89.9998	31
COVID-	55.0012	0
COVID-	35.499	0
COVID-	39.7502	1
COVID-	46.4964	2
COVID-	52.07	4
COVID-	55.9994	5
COVID-	56.4401	6
COVID-	60.96	9
COVID-	63.2003	10
COVID-	68.58	12
COVID-	69.85	15
COVID-	74.93	17
COVID-	83.82	29
COVID-	51.8528	0
COVID-	58.42	2
COVID-	67.945	4
COVID-	71.12	6
COVID-	79.9998	12
COVID-	86.36	17
COVID-	88.0008	21
COVID-	94.9452	24
COVID-	97.2998	31
COVID-	51.0184	0
COVID-	56.896	1
COVID-	59.69	2
COVID-	64.77	4
COVID-	64.77	6
COVID-	76.708	15
COVID-	92.9996	29
COVID-	91.44	31
COVID-	50.1294	0
COVID-	59.69	2
COVID-	71.755	7
COVID-	78.5012	11
COVID-	87.0001	18
COVID-	50.9473	0
COVID-	61.9989	3
COVID-	68.9991	6
COVID-	85.09	13
COVID-	88.9991	24
COVID-	97.79	29
COVID-	49.2684	0
COVID-	62.23	4
COVID-	73.66	7
COVID-	73.66	8
COVID-	83.82	13
COVID-	97.79	33
COVID-	48.26	0
COVID-	51.562	0
COVID-	55.88	1
COVID-	63.5	3
COVID-	69.342	5
COVID-	70.612	7
COVID-	76.2	12
COVID-	86.36	25
COVID-	48.26	0
COVID-	53.34	1
COVID-	57.0001	2
COVID-	64.77	4
COVID-	68.5013	6
COVID-	77.47	13
COVID-	82.55	20
COVID-	86.995	25
COVID-	49.8927	0
COVID-	52.9996	1
COVID-	59.69	2
COVID-	66.04	4
COVID-	72.39	7
COVID-	77.0001	10
COVID-	80.01	12
COVID-	81.0006	15
COVID-	87.63	18
COVID-	91.0006	24
COVID-	91.9988	25
COVID-	94.0003	31
COVID-	50.8	0
COVID-	54.61	1
COVID-	59.69	2
COVID-	64.5871	4
COVID-	68.58	6
COVID-	75.565	12
COVID-	83.82	18
COVID-	85.725	22
COVID-	85.6005	23
COVID-	87.63	24
COVID-	95.885	31
COVID-	53.5413	0
COVID-	55.88	1
COVID-	60.9994	2
COVID-	64.8348	4
COVID-	69.85	6
COVID-	75.0011	9
COVID-	75.565	11
COVID-	75.9993	12
COVID-	77.3989	16
COVID-	80.5002	18
COVID-	86.4574	25
COVID-	91.9988	31
COVID-	49.0068	0
COVID-	55.245	2
COVID-	60.325	5
COVID-	66.04	7
COVID-	71.12	12
COVID-	84.0003	21
COVID-	81.9988	23
COVID-	85.9993	24
COVID-	84.3013	25
COVID-	48.26	0
COVID-	44.45	0
COVID-	46.9951	0
COVID-	52.0344	0
COVID-	66.7995	5
COVID-	79.9998	17
COVID-	90.5002	27
COVID-	50.7492	0
COVID-	54.5008	1
COVID-	58.4098	2
COVID-	64.135	4
COVID-	68.0009	9
COVID-	47.3799	0
COVID-	50.8	1
COVID-	59.9999	3
COVID-	64.77	5
COVID-	67.0001	6
COVID-	75.9993	14
COVID-	82.9996	23
COVID-	88.9	30
COVID-	52.0344	0
COVID-	54.4034	1
COVID-	59.055	2
COVID-	64.77	4
COVID-	65.0011	5
COVID-	72.39	7
COVID-	83.82	12
COVID-	86.0298	15
COVID-	88.9	19
COVID-	89.9998	22
COVID-	91.501	25
COVID-	96.52	32
COVID-	49.53	0
COVID-	52.705	1
COVID-	57.15	2
COVID-	63.5	4
COVID-	68.58	7
COVID-	73.66	11
COVID-	73.66	13
COVID-	86.36	25
COVID-	48.895	0
COVID-	57.15	2
COVID-	62.23	4
COVID-	68.58	7
COVID-	47.0002	0
COVID-	50.8	0
COVID-	63.754	5
COVID-	66.04	6
COVID-	71.628	9
COVID-	78.0009	13
COVID-	72.39	14
COVID-	81.28	16
COVID-	83.82	20
COVID-	87.63	25
COVID-	89.9998	31
COVID-	47.3075	0
COVID-	51.0007	1
COVID-	57.15	2
COVID-	63.5	4
COVID-	66.04	6
COVID-	71.12	11
COVID-	71.12	12
COVID-	74.295	15
COVID-	81.28	21
COVID-	82.55	25
COVID-	90.17	31
COVID-	50.8	0
COVID-	51.435	1
COVID-	58.0009	2
COVID-	61.0006	4
COVID-	65.405	7
COVID-	71.12	11
COVID-	76.2	17
COVID-	83.185	27
COVID-	47.3075	0
COVID-	55.88	2
COVID-	62.23	4
COVID-	66.04	6
COVID-	73.66	10
COVID-	76.708	12
COVID-	78.9991	15
COVID-	81.9988	19
COVID-	86.36	24
COVID-	93.98	31
COVID-	45.3625	0
COVID-	49.5008	1
COVID-	53.7007	2
COVID-	61.0006	4
COVID-	65.499	6
COVID-	68.0009	9
COVID-	72.4992	12
COVID-	76.2	15
COVID-	77.47	18
COVID-	80.5002	19
COVID-	50.546	0
COVID-	57.658	2
COVID-	65.405	4
COVID-	67.31	6
COVID-	64.4398	8
COVID-	72.9488	9
COVID-	77.216	14
COVID-	81.28	22
COVID-	85.8012	24
COVID-	90.17	29
COVID-	49.53	0
COVID-	48.26	0
COVID-	53.2498	0
COVID-	57.15	1
COVID-	66.4997	4
COVID-	67.31	6
COVID-	71.12	10
COVID-	74.5007	13
COVID-	80.01	16
COVID-	86.36	18
COVID-	81.8007	20
COVID-	85.09	22
COVID-	85.0011	25
COVID-	94.3	33
COVID-	49.4995	0
COVID-	48.6296	0
COVID-	58.0009	2
COVID-	63.5	4
COVID-	69.215	7
COVID-	74.93	11
COVID-	78.0009	12
COVID-	85.09	20
COVID-	89.535	25
COVID-	93.4999	33
COVID-	51.8998	0
COVID-	58.0009	1
COVID-	59.4995	2
COVID-	66.04	4
COVID-	71.9988	7
COVID-	77.5005	10
COVID-	78.0009	13
COVID-	87.63	16
COVID-	85.9993	19
COVID-	46.99	0
COVID-	55.88	2
COVID-	62.23	4
COVID-	67.056	7
COVID-	73.66	11
COVID-	75.184	13
COVID-	79.756	16
COVID-	84.328	19
COVID-	87.884	26
COVID-	50.8	0
COVID-	51.67	0
COVID-	102.87	29
COVID-	47.6123	0
COVID-	81.9988	15
COVID-	81.915	17
COVID-	81.9988	18
COVID-	81.9988	19
COVID-	84.0003	20
COVID-	84.8004	24
COVID-	86.36	25
COVID-	49.8475	0
COVID-	53.34	1
COVID-	57.15	2
COVID-	61.722	4
COVID-	70.612	7
COVID-	71.0006	9
COVID-	74.93	12
COVID-	77.1195	14
COVID-	83.82	18
COVID-	85.0011	20
COVID-	88.9	25
COVID-	93.98	31
COVID-	50.125	0
COVID-	52.4999	1
COVID-	54.6009	2
COVID-	54.0004	3
COVID-	59.1998	4
COVID-	60.5003	5
COVID-	62.9289	6
COVID-	62.8328	7
COVID-	63.2498	8
COVID-	68.0009	10
COVID-	71.4002	11
COVID-	72.9996	12
COVID-	74.0004	14
COVID-	75.5863	15
COVID-	77.47	17
COVID-	77.7946	18
COVID-	80.6683	19
COVID-	83.82	20
COVID-	80.6061	21
COVID-	74.0986	23
COVID-	74.2975	24
COVID-	80.4266	25
COVID-	84.2988	27
COVID-	87.9996	28
COVID-	87.5005	29
COVID-	87.0001	32
COVID-	92.5	33
COVID-	88.9	34
COVID-	48.26	0
COVID-	55.88	2
COVID-	63.6905	4
COVID-	68.58	7
COVID-	73.66	9
COVID-	79.248	13
COVID-	79.6011	18
COVID-	88.0008	25
COVID-	49.53	0
COVID-	53.34	1
COVID-	57.785	2
COVID-	65.278	5
COVID-	67.31	7
COVID-	76.2	10
COVID-	78.994	15
COVID-	86.868	26
COVID-	52.0344	0
COVID-	52.6898	0
COVID-	60.96	2
COVID-	69.85	4
COVID-	73.66	6
COVID-	81.28	12
COVID-	85.725	15
COVID-	91.44	19
COVID-	92.4903	25
COVID-	50.8	0
COVID-	47.371	0
COVID-	55.245	2
COVID-	52.9996	0
COVID-	65.0011	2
COVID-	47.3304	0
COVID-	53.34	1
COVID-	55.88	2
COVID-	62.738	5
COVID-	66.04	7
COVID-	78.74	13
COVID-	79.9998	17
COVID-	85.344	20
COVID-	87.63	25
COVID-	94.996	33
COVID-	49.53	0
COVID-	48.9339	0
COVID-	55.499	1
COVID-	55.88	2
COVID-	63.5	4
COVID-	67.818	6
COVID-	77.47	9
COVID-	77.5995	10
COVID-	81.6394	12
COVID-	81.28	15
COVID-	86.36	19
COVID-	91.44	27
COVID-	95.4989	32
COVID-	54.403	0
COVID-	58.42	2
COVID-	66.04	5
COVID-	71.12	7
COVID-	71.0997	9
COVID-	77.47	12
COVID-	82.9996	15
COVID-	83.82	17
COVID-	86.36	19
COVID-	86.36	21
COVID-	88.9	25
COVID-	93.2497	27
COVID-	95.0011	31
COVID-	49.2646	0
COVID-	53.34	1
COVID-	58.42	2
COVID-	66.04	4
COVID-	68.072	6
COVID-	74.93	10
COVID-	83.82	15
COVID-	88.9	18
COVID-	93.218	25
COVID-	91.44	26
COVID-	48.5064	0
COVID-	53.975	1
COVID-	58.0009	2
COVID-	62.23	3
COVID-	66.04	5
COVID-	68.0009	7
COVID-	75.0011	10
COVID-	78.9991	15
COVID-	46.99	0
COVID-	59.9999	3
COVID-	63.1	4
COVID-	63.5	5
COVID-	49.9999	0
COVID-	46.4977	0
COVID-	48.26	1
COVID-	53.34	2
COVID-	63.5	4
COVID-	80.01	12
COVID-	83.82	16
COVID-	83.82	20
COVID-	83.82	21
COVID-	88.9991	26
COVID-	91.44	33
COVID-	50.5003	0
COVID-	54.864	3
COVID-	62.23	4
COVID-	64.77	6
COVID-	68.58	9
COVID-	73.66	12
COVID-	76.2	15
COVID-	80.264	18
COVID-	86.36	25
COVID-	93.98	31
COVID-	48.26	0
COVID-	48.2752	0
COVID-	49.53	1
COVID-	55.88	2
COVID-	50.9003	0
COVID-	54.61	2
COVID-	67.31	8
COVID-	72.39	11
COVID-	78.0009	15
COVID-	79.9998	19
COVID-	84.0003	24
COVID-	89.9998	31
COVID-	49.022	0
COVID-	57.15	1
COVID-	62.484	2
COVID-	65.024	5
COVID-	74.168	8
COVID-	76.2	10
COVID-	81.28	14
COVID-	83.82	16
COVID-	83.82	18
COVID-	91.44	25
COVID-	96.52	30
COVID-	46.3135	0
COVID-	53.34	2
COVID-	58.42	3
COVID-	58.42	5
COVID-	62.992	7
COVID-	67.31	9
COVID-	71.9988	10
COVID-	73.66	12
COVID-	75.9993	15
COVID-	79.9998	17
COVID-	83.82	25
COVID-	90.17	31
COVID-	50.7009	0
COVID-	50.9994	0
COVID-	55.9994	1
COVID-	63.5	3
COVID-	71.9988	8
COVID-	72.9996	9
COVID-	77.47	12
COVID-	80.01	13
COVID-	86.36	21
COVID-	81.0006	22
COVID-	41.91	0
COVID-	52.0649	0
COVID-	54.61	1
COVID-	59.055	2
COVID-	70.5002	8
COVID-	79.9376	12
COVID-	47.5005	0
COVID-	74.676	15
COVID-	78.74	18
COVID-	80.6894	25
COVID-	85.3999	28
COVID-	85.3948	29
COVID-	83.82	31
COVID-	85.1992	34
COVID-	53.34	0
COVID-	51.435	0
COVID-	62.23	2
COVID-	64.77	4
COVID-	69.85	5
COVID-	68.58	6
COVID-	73.66	9
COVID-	78.74	13
COVID-	78.801	14
COVID-	80.01	15
COVID-	45.3961	0
COVID-	53.34	2
COVID-	57.15	4
COVID-	61.9989	6
COVID-	72.9996	12
COVID-	76.2	15
COVID-	76.4997	18
COVID-	86.36	25
COVID-	88.9	31
COVID-	49.53	0
COVID-	75.9993	15
COVID-	49.1973	0
COVID-	59.944	2
COVID-	66.04	5
COVID-	71.628	6
COVID-	77.47	10
COVID-	81.28	12
COVID-	84.328	16
COVID-	87.376	18
COVID-	91.948	24
COVID-	93.98	30
COVID-	46.355	0
COVID-	50.8	1
COVID-	58.42	2
COVID-	62.23	4
COVID-	68.58	6
COVID-	71.12	9
COVID-	74.93	12
COVID-	81.28	15
COVID-	87.0001	18
COVID-	85.9993	25
COVID-	92.71	30
COVID-	51.9328	0
COVID-	59.69	2
COVID-	66.04	4
COVID-	70.104	6
COVID-	77.47	10
COVID-	78.9991	11
COVID-	81.28	12
COVID-	88.0008	18
COVID-	54.4381	0
COVID-	56.4998	1
COVID-	56.4998	2
COVID-	63.5	3
COVID-	68.58	6
COVID-	74.93	8
COVID-	86.36	12
COVID-	87.63	19
COVID-	87.4497	23
COVID-	92.075	24
COVID-	88.9	25
COVID-	97.0001	27
COVID-	91.9988	28
COVID-	91.9988	30
COVID-	95.9993	31
COVID-	49.6663	0
COVID-	58.9991	2
COVID-	50.8	0
COVID-	48.0009	0
COVID-	50.8	0
COVID-	53.34	1
COVID-	58.42	2
COVID-	69.85	5
COVID-	68.58	6
COVID-	73.66	9
COVID-	77.47	12
COVID-	78.74	15
COVID-	81.28	19
COVID-	83.82	21
COVID-	91.44	24
COVID-	93.98	30
COVID-	47.625	0
COVID-	61.9989	9
COVID-	77.47	12
COVID-	82.4992	16
COVID-	89.4994	22
COVID-	91.0006	25
COVID-	94.0003	27
COVID-	96.4997	28
COVID-	97.0001	32
COVID-	51.0007	0
COVID-	48.5079	0
COVID-	57.658	3
COVID-	73.66	11
COVID-	74.93	14
COVID-	82.9996	19
COVID-	87.5005	25
COVID-	51.9989	0
COVID-	58.42	2
COVID-	64.0004	4
COVID-	71.0006	9
COVID-	78.74	14
COVID-	48.26	0
COVID-	57.15	2
COVID-	53.975	0
COVID-	58.42	2
COVID-	64.77	4
COVID-	74.93	8
COVID-	80.01	12
COVID-	96.52	22
COVID-	0	30
COVID-	50.165	0
COVID-	88.9991	26
COVID-	88.6003	27
COVID-	48.26	0
COVID-	50.8	0
COVID-	85.9993	25
COVID-	87.0001	27
COVID-	48.3997	0
COVID-	51.501	2
COVID-	59.4995	4
COVID-	64.0004	6
COVID-	66.675	9
COVID-	73.66	12
COVID-	77.47	15
COVID-	78.74	19
COVID-	83.82	23
COVID-	88.9	33
COVID-	52.705	0
COVID-	59.69	2
COVID-	67.945	4
COVID-	72.39	6
COVID-	51.1996	0
[truncated: 53,702 more rows]

## Sheet: Fig 1C
Cohort	HC Age (months)	HC (cm)
COVID non-Hospitalized	0.131507	11.5011
COVID non-Hospitalized	0.230137	12.8499
COVID non-Hospitalized	0.0986301	12.9997
COVID non-Hospitalized	0.164384	13.2512
COVID non-Hospitalized	0.0986301	13.2512
COVID non-Hospitalized	0.164384	13.5992
COVID non-Hospitalized	0.558904	13.749
COVID non-Hospitalized	0.427397	14.0005
COVID non-Hospitalized	0.460274	14.2494
COVID non-Hospitalized	0.328767	14.5009
COVID non-Hospitalized	22.2575	52.07
COVID non-Hospitalized	20.8767	52.07
COVID non-Hospitalized	10.0932	52.07
COVID non-Hospitalized	16.274	51.435
COVID non-Hospitalized	22.0274	51.0007
COVID non-Hospitalized	21.1726	51.0007
COVID non-Hospitalized	8.15342	51.0007
COVID non-Hospitalized	15.3863	50.8
COVID non-Hospitalized	21.8301	50.8
COVID non-Hospitalized	18.5753	50.8
COVID non-Hospitalized	10.5863	50.8
COVID non-Hospitalized	12.2301	50.8
COVID non-Hospitalized	18.0493	50.8
COVID non-Hospitalized	19.2986	50.8
COVID non-Hospitalized	20.8438	50.8
COVID non-Hospitalized	22.4548	50.8
COVID non-Hospitalized	18.674	50.8
COVID non-Hospitalized	15.5836	50.8
COVID non-Hospitalized	19.0685	50.8
COVID non-Hospitalized	18.4767	50.8
COVID non-Hospitalized	15.0575	50.8
COVID non-Hospitalized	17.9507	50.8
COVID non-Hospitalized	22.9479	50.8
COVID non-Hospitalized	20.6795	50.8
COVID non-Hospitalized	15.3205	50.8
COVID non-Hospitalized	17.4575	50.8
COVID non-Hospitalized	19.463	50.8
COVID non-Hospitalized	12.6575	50.8
COVID non-Hospitalized	12.1644	50.8
COVID non-Hospitalized	32.3507	18.9992
COVID non-Hospitalized	21.6	50.5003
COVID non-Hospitalized	30.5425	18.9992
COVID non-Hospitalized	24.263	18.9992
COVID non-Hospitalized	18.0493	50.5003
COVID non-Hospitalized	18.0164	50.419
COVID non-Hospitalized	21.074	50.165
COVID non-Hospitalized	15.5178	50.165
COVID non-Hospitalized	24.263	19.4996
COVID non-Hospitalized	23.6384	50.165
COVID non-Hospitalized	20.0548	50.165
COVID non-Hospitalized	19.2329	49.9999
COVID non-Hospitalized	23.7041	49.9999
COVID non-Hospitalized	23.7699	49.9999
COVID non-Hospitalized	18.2466	49.9999
COVID non-Hospitalized	22.2904	49.9999
COVID non-Hospitalized	0.263014	20.5003
COVID non-Hospitalized	0.263014	21.0007
COVID non-Hospitalized	0.427397	21.0007
COVID non-Hospitalized	0.493151	21.5011
COVID non-Hospitalized	0.164384	21.5011
COVID non-Hospitalized	0.460274	21.5011
COVID non-Hospitalized	0.591781	21.5011
COVID non-Hospitalized	0.624658	21.5011
COVID non-Hospitalized	18.8712	49.9999
COVID non-Hospitalized	16.274	49.9999
COVID non-Hospitalized	0.723288	21.9989
COVID non-Hospitalized	0.460274	21.9989
COVID non-Hospitalized	0.526027	21.9989
COVID non-Hospitalized	0.558904	21.9989
COVID non-Hospitalized	0.690411	21.9989
COVID non-Hospitalized	0.756164	21.9989
COVID non-Hospitalized	0.789041	21.9989
COVID non-Hospitalized	15.3534	49.9999
COVID non-Hospitalized	0.19726	21.9989
COVID non-Hospitalized	0.361644	21.9989
COVID non-Hospitalized	0.624658	22.4003
COVID non-Hospitalized	0.131507	22.4993
COVID non-Hospitalized	0.394521	22.4993
COVID non-Hospitalized	17.4575	49.9999
COVID non-Hospitalized	0.131507	22.4993
COVID non-Hospitalized	0.361644	22.4993
COVID non-Hospitalized	0.361644	22.9997
COVID non-Hospitalized	0.460274	22.9997
COVID non-Hospitalized	12.0329	49.9999
COVID non-Hospitalized	13.0192	49.9999
COVID non-Hospitalized	0.854795	22.9997
COVID non-Hospitalized	0.263014	22.9997
COVID non-Hospitalized	0.328767	22.9997
COVID non-Hospitalized	0.558904	22.9997
COVID non-Hospitalized	12.0986	49.9999
COVID non-Hospitalized	16.274	49.784
COVID non-Hospitalized	0.624658	22.9997
COVID non-Hospitalized	0.591781	23.5001
COVID non-Hospitalized	0.493151	23.5001
COVID non-Hospitalized	0.526027	23.5001
COVID non-Hospitalized	15.5836	49.53
COVID non-Hospitalized	15.1233	49.53
COVID non-Hospitalized	0.164384	23.5001
COVID non-Hospitalized	0.394521	23.5001
COVID non-Hospitalized	0.821918	23.5001
COVID non-Hospitalized	19.1342	49.53
COVID non-Hospitalized	0.854795	23.5001
COVID non-Hospitalized	12.0658	49.53
COVID non-Hospitalized	0.986301	24.0005
COVID non-Hospitalized	18.5425	49.53
COVID non-Hospitalized	0.328767	24.0005
COVID non-Hospitalized	0.460274	24.0005
COVID non-Hospitalized	0.493151	24.0005
COVID non-Hospitalized	16.4712	49.53
COVID non-Hospitalized	0.723288	24.0005
COVID non-Hospitalized	0.953425	24.0005
COVID non-Hospitalized	15.5836	49.53
COVID non-Hospitalized	19.0027	49.53
COVID non-Hospitalized	18.937	49.53
COVID non-Hospitalized	0.558904	24.0005
COVID non-Hospitalized	12.1315	49.53
COVID non-Hospitalized	0.164384	24.5008
COVID non-Hospitalized	0.19726	24.5008
COVID non-Hospitalized	0.361644	24.5008
COVID non-Hospitalized	0.427397	24.5008
COVID non-Hospitalized	21.4027	49.53
COVID non-Hospitalized	0.789041	24.5008
COVID non-Hospitalized	0.920548	24.5008
COVID non-Hospitalized	0.29589	24.5008
COVID non-Hospitalized	0.526027	24.5008
COVID non-Hospitalized	18.0164	49.53
COVID non-Hospitalized	0.0986301	25.0012
COVID non-Hospitalized	0.19726	25.0012
COVID non-Hospitalized	0.230137	25.0012
COVID non-Hospitalized	12.0658	49.53
COVID non-Hospitalized	18.1151	49.53
COVID non-Hospitalized	14.4329	49.53
COVID non-Hospitalized	16.5041	49.53
COVID non-Hospitalized	19.9562	49.53
COVID non-Hospitalized	15.3863	49.53
COVID non-Hospitalized	18.6082	49.53
COVID non-Hospitalized	16.537	49.53
COVID non-Hospitalized	11.0466	49.53
COVID non-Hospitalized	18.2466	49.53
COVID non-Hospitalized	0.131507	25.0012
COVID non-Hospitalized	0.591781	25.0012
COVID non-Hospitalized	15.5836	49.53
COVID non-Hospitalized	0.821918	25.4991
COVID non-Hospitalized	0.29589	25.4991
COVID non-Hospitalized	18.937	49.53
COVID non-Hospitalized	10.3562	49.53
COVID non-Hospitalized	11.1123	49.53
COVID non-Hospitalized	18.0164	49.53
COVID non-Hospitalized	19.8575	49.4995
COVID non-Hospitalized	17.8192	49.4995
COVID non-Hospitalized	15.1562	49.4995
COVID non-Hospitalized	16.4712	49.4995
COVID non-Hospitalized	0.361644	25.4991
COVID non-Hospitalized	0.591781	25.4991
COVID non-Hospitalized	15.5507	49.4995
COVID non-Hospitalized	0.460274	25.9994
COVID non-Hospitalized	12.4932	49.4995
COVID non-Hospitalized	0.657534	25.9994
COVID non-Hospitalized	0.756164	25.9994
COVID non-Hospitalized	12.1315	49.276
COVID non-Hospitalized	0.19726	25.9994
COVID non-Hospitalized	0.657534	25.9994
COVID non-Hospitalized	15.6493	49.1998
COVID non-Hospitalized	0.591781	25.9994
COVID non-Hospitalized	21.337	49.022
COVID non-Hospitalized	0.854795	25.9994
COVID non-Hospitalized	0.756164	25.9994
COVID non-Hospitalized	0.0986301	25.9994
COVID non-Hospitalized	16.0438	48.9991
COVID non-Hospitalized	12.8877	48.9991
COVID non-Hospitalized	18.0493	48.9991
COVID non-Hospitalized	21.1068	48.9991
COVID non-Hospitalized	17.3918	48.9991
COVID non-Hospitalized	17.2274	48.9991
COVID non-Hospitalized	17.6877	48.9991
COVID non-Hospitalized	17.4575	48.9991
COVID non-Hospitalized	20.3836	48.9991
COVID non-Hospitalized	0.0657534	26.4998
COVID non-Hospitalized	0.526027	26.4998
COVID non-Hospitalized	11.9014	48.9991
COVID non-Hospitalized	15.1562	48.9991
COVID non-Hospitalized	18.1479	48.9991
COVID non-Hospitalized	12.3945	48.9991
COVID non-Hospitalized	21.0411	48.9991
COVID non-Hospitalized	0.0986301	26.4998
COVID non-Hospitalized	0.328767	26.4998
COVID non-Hospitalized	0.230137	26.4998
COVID non-Hospitalized	0.821918	26.4998
COVID non-Hospitalized	18.6082	48.9991
COVID non-Hospitalized	0.821918	26.4998
COVID non-Hospitalized	0.986301	26.4998
COVID non-Hospitalized	0.558904	26.4998
COVID non-Hospitalized	12.1315	48.9991
COVID non-Hospitalized	17.9507	48.9991
COVID non-Hospitalized	13.0192	48.9991
COVID non-Hospitalized	0.0328767	27.0002
COVID non-Hospitalized	18.8055	48.9991
COVID non-Hospitalized	0.0657534	27.0002
COVID non-Hospitalized	15.6493	48.9991
COVID non-Hospitalized	15.2548	48.9991
COVID non-Hospitalized	12.2301	48.9991
COVID non-Hospitalized	0.821918	27.0002
COVID non-Hospitalized	0.887671	27.0002
COVID non-Hospitalized	0.460274	27.0002
COVID non-Hospitalized	0.690411	27.0002
COVID non-Hospitalized	0.427397	27.0002
COVID non-Hospitalized	0.887671	27.0002
COVID non-Hospitalized	18.8384	48.9991
COVID non-Hospitalized	0.328767	27.0002
COVID non-Hospitalized	0.361644	27.0002
COVID non-Hospitalized	0.821918	27.0002
COVID non-Hospitalized	16.6356	48.9991
COVID non-Hospitalized	0.328767	27.5006
COVID non-Hospitalized	14.5315	48.9991
COVID non-Hospitalized	0.920548	27.5006
COVID non-Hospitalized	0.953425	27.5006
COVID non-Hospitalized	16.3726	48.9991
COVID non-Hospitalized	12.3945	48.9991
COVID non-Hospitalized	12.8548	48.9991
COVID non-Hospitalized	12.3288	48.9991
COVID non-Hospitalized	9.63288	48.9991
COVID non-Hospitalized	10.7836	48.9991
COVID non-Hospitalized	12.1315	48.895
COVID non-Hospitalized	18.7726	48.895
COVID non-Hospitalized	14.8603	48.895
COVID non-Hospitalized	19.9233	48.895
COVID non-Hospitalized	12.3945	48.895
COVID non-Hospitalized	18.0493	48.895
COVID non-Hospitalized	12.0329	48.895
COVID non-Hospitalized	18.2137	48.895
COVID non-Hospitalized	11.0137	48.895
COVID non-Hospitalized	12.0986	48.895
COVID non-Hospitalized	18.5753	48.895
COVID non-Hospitalized	0.558904	28.001
COVID non-Hospitalized	0.558904	28.001
COVID non-Hospitalized	12.3945	48.895
COVID non-Hospitalized	0.756164	28.001
COVID non-Hospitalized	0.19726	28.001
COVID non-Hospitalized	0.920548	28.001
COVID non-Hospitalized	18.5753	48.895
COVID non-Hospitalized	15.6493	48.895
COVID non-Hospitalized	15.5178	48.895
COVID non-Hospitalized	12.0986	48.895
COVID non-Hospitalized	13.4137	48.801
COVID non-Hospitalized	18.6082	48.768
COVID non-Hospitalized	21.5014	48.768
COVID non-Hospitalized	18.411	48.768
COVID non-Hospitalized	0.361644	28.001
COVID non-Hospitalized	0.29589	28.001
COVID non-Hospitalized	0.0328767	28.001
COVID non-Hospitalized	0.0657534	28.001
COVID non-Hospitalized	0.0986301	28.001
COVID non-Hospitalized	0.558904	28.001
COVID non-Hospitalized	0.19726	28.001
COVID non-Hospitalized	0.789041	28.001
COVID non-Hospitalized	0.263014	28.3997
COVID non-Hospitalized	15.1562	48.768
COVID non-Hospitalized	16.011	48.768
COVID non-Hospitalized	6.41096	48.768
COVID non-Hospitalized	15.4521	48.6004
COVID non-Hospitalized	18.7397	48.514
COVID non-Hospitalized	0.920548	28.4988
COVID non-Hospitalized	12.5589	48.4988
COVID non-Hospitalized	24	48.4988
COVID non-Hospitalized	18.2466	48.4988
COVID non-Hospitalized	0.526027	28.4988
COVID non-Hospitalized	0.230137	28.4988
COVID non-Hospitalized	13.4466	48.4988
COVID non-Hospitalized	0.427397	28.4988
COVID non-Hospitalized	16.5699	48.4988
COVID non-Hospitalized	0.789041	28.9992
COVID non-Hospitalized	0.986301	28.9992
COVID non-Hospitalized	0.427397	28.9992
COVID non-Hospitalized	17.9507	48.4988
COVID non-Hospitalized	12.3288	48.4988
COVID non-Hospitalized	0.263014	28.9992
COVID non-Hospitalized	0.0328767	28.9992
COVID non-Hospitalized	0.723288	28.9992
COVID non-Hospitalized	0.591781	28.9992
COVID non-Hospitalized	0.591781	28.9992
COVID non-Hospitalized	0.0328767	28.9992
COVID non-Hospitalized	0.0657534	28.9992
COVID non-Hospitalized	0.0986301	28.9992
COVID non-Hospitalized	19.1342	48.3997
COVID non-Hospitalized	18.2466	48.26
COVID non-Hospitalized	0.0657534	28.9992
COVID non-Hospitalized	0.789041	28.9992
COVID non-Hospitalized	0.657534	28.9992
COVID non-Hospitalized	0.164384	29.4996
COVID non-Hospitalized	0.263014	29.4996
COVID non-Hospitalized	23.9671	48.26
COVID non-Hospitalized	14.4658	48.26
COVID non-Hospitalized	0.0986301	29.4996
COVID non-Hospitalized	8.67945	48.26
COVID non-Hospitalized	15.5507	48.26
COVID non-Hospitalized	12.1315	48.26
COVID non-Hospitalized	21.2055	48.26
COVID non-Hospitalized	12.526	48.26
COVID non-Hospitalized	12.0986	48.26
COVID non-Hospitalized	12.0658	48.26
COVID non-Hospitalized	17.1616	48.26
COVID non-Hospitalized	16.1096	48.26
COVID non-Hospitalized	0.591781	29.4996
COVID non-Hospitalized	13.2822	48.26
COVID non-Hospitalized	18.1151	48.26
COVID non-Hospitalized	18.0822	48.26
COVID non-Hospitalized	10.2904	48.26
COVID non-Hospitalized	16.9644	48.26
COVID non-Hospitalized	18.2466	48.26
COVID non-Hospitalized	17.8192	48.26
COVID non-Hospitalized	22.4548	48.26
COVID non-Hospitalized	18.4767	48.26
COVID non-Hospitalized	13.874	48.26
COVID non-Hospitalized	16.0767	48.26
COVID non-Hospitalized	13.4137	48.26
COVID non-Hospitalized	18.937	48.26
COVID non-Hospitalized	9.23836	48.26
COVID non-Hospitalized	15.189	48.26
COVID non-Hospitalized	9.0411	48.26
COVID non-Hospitalized	9.92877	48.26
COVID non-Hospitalized	12.0986	48.26
COVID non-Hospitalized	15.0904	48.26
COVID non-Hospitalized	12.1644	48.26
COVID non-Hospitalized	15.7151	48.26
COVID non-Hospitalized	18.0493	48.26
COVID non-Hospitalized	19.7918	48.26
COVID non-Hospitalized	0.29589	29.4996
COVID non-Hospitalized	23.7699	48.26
COVID non-Hospitalized	18.6082	48.26
COVID non-Hospitalized	23.5726	48.26
COVID non-Hospitalized	0.164384	29.9999
COVID non-Hospitalized	0.657534	29.9999
COVID non-Hospitalized	0.361644	29.9999
COVID non-Hospitalized	15.1233	48.26
COVID non-Hospitalized	0.0328767	29.9999
COVID non-Hospitalized	0.493151	29.9999
COVID non-Hospitalized	0.19726	29.9999
COVID non-Hospitalized	0.0657534	29.9999
COVID non-Hospitalized	12.0658	48.26
COVID non-Hospitalized	18.674	48.26
COVID non-Hospitalized	0.29589	29.9999
COVID non-Hospitalized	0.526027	29.9999
COVID non-Hospitalized	0.756164	29.9999
COVID non-Hospitalized	9.00822	48.26
COVID non-Hospitalized	9.36986	48.26
COVID non-Hospitalized	15.3863	48.26
COVID non-Hospitalized	20.0548	48.26
COVID non-Hospitalized	9.33699	48.26
COVID non-Hospitalized	10.2904	48.26
COVID non-Hospitalized	0.591781	29.9999
COVID non-Hospitalized	0.0328767	29.9999
COVID non-Hospitalized	16.6685	48.26
COVID non-Hospitalized	0.164384	29.9999
COVID non-Hospitalized	19.1342	48.26
COVID non-Hospitalized	0.0657534	29.9999
COVID non-Hospitalized	0.29589	29.9999
COVID non-Hospitalized	0.29589	29.9999
COVID non-Hospitalized	0.624658	29.9999
COVID non-Hospitalized	0.131507	29.9999
COVID non-Hospitalized	0.230137	29.9999
COVID non-Hospitalized	15.6822	48.26
COVID non-Hospitalized	22.8164	48.26
COVID non-Hospitalized	0.526027	30.3987
COVID non-Hospitalized	0.131507	30.48
COVID non-Hospitalized	0.164384	30.48
COVID non-Hospitalized	0.0986301	30.48
COVID non-Hospitalized	22.4548	48.26
COVID non-Hospitalized	0.460274	30.5003
COVID non-Hospitalized	0.493151	30.5003
COVID non-Hospitalized	0.0328767	30.5003
COVID non-Hospitalized	0.328767	30.5003
COVID non-Hospitalized	0.361644	30.5003
COVID non-Hospitalized	0.164384	30.5003
COVID non-Hospitalized	11.4082	48.26
COVID non-Hospitalized	0.0328767	30.5003
COVID non-Hospitalized	0.0328767	30.5003
COVID non-Hospitalized	21.4685	48.26
COVID non-Hospitalized	12.1973	48.26
COVID non-Hospitalized	12.9205	48.26
COVID non-Hospitalized	0.0657534	30.5003
COVID non-Hospitalized	0.0986301	30.5003
COVID non-Hospitalized	0.131507	30.5003
COVID non-Hospitalized	0.526027	30.5003
COVID non-Hospitalized	0.164384	30.5003
COVID non-Hospitalized	0.624658	30.5003
COVID non-Hospitalized	0.0328767	30.5003
COVID non-Hospitalized	0.0986301	30.5003
COVID non-Hospitalized	12.0329	48.26
COVID non-Hospitalized	16.5041	48.26
COVID non-Hospitalized	20.5808	48.26
COVID non-Hospitalized	0.19726	30.988
COVID non-Hospitalized	0.723288	30.988
COVID non-Hospitalized	0.19726	31.0007
COVID non-Hospitalized	0.0657534	31.0007
COVID non-Hospitalized	0.29589	31.0007
COVID non-Hospitalized	12.4274	48.26
COVID non-Hospitalized	0.723288	31.0007
COVID non-Hospitalized	0.0657534	31.0007
COVID non-Hospitalized	0.164384	31.0007
COVID non-Hospitalized	0.0328767	31.0007
COVID non-Hospitalized	0.0328767	31.0007
COVID non-Hospitalized	0.591781	31.0007
COVID non-Hospitalized	0.394521	31.0007
COVID non-Hospitalized	9.66575	48.26
COVID non-Hospitalized	11.1781	48.26
COVID non-Hospitalized	0.427397	31.0007
COVID non-Hospitalized	15.0575	48.26
COVID non-Hospitalized	19.463	48.26
COVID non-Hospitalized	0.19726	31.0007
COVID non-Hospitalized	12.8219	48.26
COVID non-Hospitalized	18.5096	48.26
COVID non-Hospitalized	15.8795	48.26
COVID non-Hospitalized	18.5753	48.26
COVID non-Hospitalized	20.2192	48.26
COVID non-Hospitalized	19.2658	48.26
COVID non-Hospitalized	15.2548	48.26
COVID non-Hospitalized	17.4904	48.26
COVID non-Hospitalized	23.0795	48.26
COVID non-Hospitalized	12.2959	48.26
COVID non-Hospitalized	0.29589	31.0007
COVID non-Hospitalized	0.558904	31.0007
COVID non-Hospitalized	18.4438	48.26
COVID non-Hospitalized	19.0685	48.26
COVID non-Hospitalized	15.5507	48.26
COVID non-Hospitalized	18.2466	48.26
COVID non-Hospitalized	22.3562	48.26
COVID non-Hospitalized	18.9041	48.26
COVID non-Hospitalized	10.3562	48.26
COVID non-Hospitalized	16.2082	48.26
COVID non-Hospitalized	14.3014	48.26
COVID non-Hospitalized	0.131507	31.0007
COVID non-Hospitalized	0.394521	31.0007
COVID non-Hospitalized	19.2658	48.26
COVID non-Hospitalized	19.9233	48.26
COVID non-Hospitalized	21.6	48.26
COVID non-Hospitalized	18.4438	48.26
COVID non-Hospitalized	12.6247	48.26
COVID non-Hospitalized	13.5781	48.26
COVID non-Hospitalized	0.526027	31.0007
COVID non-Hospitalized	0.0986301	31.0007
COVID non-Hospitalized	0.328767	31.0007
COVID non-Hospitalized	0.558904	31.0007
COVID non-Hospitalized	0.394521	31.0007
COVID non-Hospitalized	0.854795	31.0007
COVID non-Hospitalized	0.19726	31.0007
COVID non-Hospitalized	0.887671	31.0007
COVID non-Hospitalized	0.0328767	31.0007
COVID non-Hospitalized	0.0657534	31.0007
COVID non-Hospitalized	15.3863	48.26
COVID non-Hospitalized	18.0822	48.26
COVID non-Hospitalized	15.9781	48.26
COVID non-Hospitalized	19.1014	48.26
COVID non-Hospitalized	12.526	48.26
COVID non-Hospitalized	0.0986301	31.496
COVID non-Hospitalized	0.164384	31.5011
COVID non-Hospitalized	18.9041	48.26
COVID non-Hospitalized	0.0657534	31.5011
COVID non-Hospitalized	0.131507	31.5011
COVID non-Hospitalized	0.0986301	31.5011
COVID non-Hospitalized	0.394521	31.5011
COVID non-Hospitalized	18.2795	48.26
COVID non-Hospitalized	0.19726	31.5011
COVID non-Hospitalized	0.887671	31.5011
COVID non-Hospitalized	0.0657534	31.5011
COVID non-Hospitalized	0.427397	31.5011
COVID non-Hospitalized	15.0247	48.26
COVID non-Hospitalized	18.0822	48.26
COVID non-Hospitalized	0.131507	31.5011
COVID non-Hospitalized	15.8137	48.26
COVID non-Hospitalized	15.0904	48.26
COVID non-Hospitalized	0.0328767	31.5011
COVID non-Hospitalized	0.0328767	31.5011
COVID non-Hospitalized	0.0657534	31.5011
COVID non-Hospitalized	0.0328767	31.5011
COVID non-Hospitalized	11.1123	48.26
COVID non-Hospitalized	13.2493	48.26
COVID non-Hospitalized	12.0986	48.26
COVID non-Hospitalized	0.328767	31.5011
COVID non-Hospitalized	0.0328767	31.5011
COVID non-Hospitalized	0.0986301	31.5011
COVID non-Hospitalized	12.789	48.26
COVID non-Hospitalized	0.0328767	31.5011
COVID non-Hospitalized	0.0657534	31.5011
COVID non-Hospitalized	0.0328767	31.5011
COVID non-Hospitalized	7.23288	48.26
COVID non-Hospitalized	9.66575	48.26
COVID non-Hospitalized	12.1315	48.26
COVID non-Hospitalized	11.3096	48.26
COVID non-Hospitalized	12.526	48.26
COVID non-Hospitalized	0.0986301	31.5011
COVID non-Hospitalized	12.1973	48.26
COVID non-Hospitalized	12.6904	48.26
COVID non-Hospitalized	7.59452	48.26
COVID non-Hospitalized	12.0329	48.26
COVID non-Hospitalized	9.6	48.26
COVID non-Hospitalized	0.164384	31.5011
COVID non-Hospitalized	9.43562	48.26
COVID non-Hospitalized	9.0411	48.26
COVID non-Hospitalized	9.20548	48.26
COVID non-Hospitalized	9.46849	48.26
COVID non-Hospitalized	17.0301	48.199
COVID non-Hospitalized	14.7945	48.1
COVID non-Hospitalized	12.1644	48.006
COVID non-Hospitalized	0.263014	31.75
COVID non-Hospitalized	0.164384	31.75
COVID non-Hospitalized	0.131507	31.75
COVID non-Hospitalized	0.0657534	31.75
COVID non-Hospitalized	0.164384	31.75
COVID non-Hospitalized	0.0986301	31.75
COVID non-Hospitalized	0.164384	31.75
COVID non-Hospitalized	9.50137	48.0009
COVID non-Hospitalized	18.1479	48.0009
COVID non-Hospitalized	24	48.0009
COVID non-Hospitalized	15.1562	48.0009
COVID non-Hospitalized	12.3288	48.0009
COVID non-Hospitalized	15.0575	48.0009
COVID non-Hospitalized	18.1479	48.0009
COVID non-Hospitalized	0.427397	31.9989
COVID non-Hospitalized	0.0328767	31.9989
COVID non-Hospitalized	0.657534	31.9989
COVID non-Hospitalized	18.1151	48.0009
COVID non-Hospitalized	15.3205	48.0009
COVID non-Hospitalized	10.9479	48.0009
COVID non-Hospitalized	15.4192	48.0009
COVID non-Hospitalized	0.0657534	31.9989
COVID non-Hospitalized	0.131507	31.9989
COVID non-Hospitalized	13.7425	48.0009
COVID non-Hospitalized	18.5425	48.0009
COVID non-Hospitalized	14.7288	48.0009
COVID non-Hospitalized	15.0575	48.0009
COVID non-Hospitalized	18.2137	48.0009
COVID non-Hospitalized	0.230137	31.9989
COVID non-Hospitalized	0.0328767	31.9989
COVID non-Hospitalized	14.9918	48.0009
COVID non-Hospitalized	12	48.0009
COVID non-Hospitalized	18.1151	48.0009
COVID non-Hospitalized	0.131507	31.9989
COVID non-Hospitalized	9.92877	48.0009
COVID non-Hospitalized	20.2521	48.0009
COVID non-Hospitalized	0.19726	31.9989
COVID non-Hospitalized	0.460274	31.9989
COVID non-Hospitalized	0.427397	31.9989
COVID non-Hospitalized	0.493151	31.9989
COVID non-Hospitalized	15.0247	48.0009
COVID non-Hospitalized	10.6521	48.0009
COVID non-Hospitalized	0.131507	31.9989
COVID non-Hospitalized	0.230137	31.9989
COVID non-Hospitalized	20.4822	48.0009
COVID non-Hospitalized	15.0247	48.0009
COVID non-Hospitalized	18.1479	48.0009
COVID non-Hospitalized	16.2411	48.0009
COVID non-Hospitalized	19.6274	48.0009
COVID non-Hospitalized	18.6411	48.0009
COVID non-Hospitalized	0.0328767	31.9989
COVID non-Hospitalized	0.0328767	31.9989
COVID non-Hospitalized	20.0877	48.0009
COVID non-Hospitalized	20.5479	48.0009
COVID non-Hospitalized	14.1699	48.0009
COVID non-Hospitalized	15.3534	48.0009
COVID non-Hospitalized	0.164384	31.9989
COVID non-Hospitalized	17.9507	48.0009
COVID non-Hospitalized	19.2	48.0009
COVID non-Hospitalized	15.3205	48.0009
COVID non-Hospitalized	18.411	48.0009
COVID non-Hospitalized	16.7342	48.0009
COVID non-Hospitalized	12.2301	48.0009
COVID non-Hospitalized	0.0328767	31.9989
COVID non-Hospitalized	0.0328767	31.9989
COVID non-Hospitalized	12.8548	48.0009
COVID non-Hospitalized	10.7178	48.0009
COVID non-Hospitalized	11.7699	48.0009
COVID non-Hospitalized	13.4466	48.0009
COVID non-Hospitalized	12.4932	48.0009
COVID non-Hospitalized	9.53425	48.0009
COVID non-Hospitalized	10.389	48.0009
COVID non-Hospitalized	0.164384	31.9989
COVID non-Hospitalized	9.30411	47.879
COVID non-Hospitalized	15.2219	47.8003
COVID non-Hospitalized	12.7233	47.752
COVID non-Hospitalized	17.3589	47.752
COVID non-Hospitalized	8.90959	47.752
COVID non-Hospitalized	0.558904	31.9989
COVID non-Hospitalized	0.0986301	31.9989
COVID non-Hospitalized	0.0328767	31.9989
COVID non-Hospitalized	0.0657534	31.9989
COVID non-Hospitalized	0.0986301	31.9989
COVID non-Hospitalized	0.0328767	31.9989
COVID non-Hospitalized	0.0657534	31.9989
COVID non-Hospitalized	0.0657534	31.9989
COVID non-Hospitalized	0.131507	31.9989
COVID non-Hospitalized	15.2548	47.752
COVID non-Hospitalized	0.0657534	31.9989
COVID non-Hospitalized	11.9342	47.752
COVID non-Hospitalized	0.526027	31.9989
COVID non-Hospitalized	0.0328767	31.9989
COVID non-Hospitalized	0.0657534	31.9989
COVID non-Hospitalized	0.164384	31.9989
COVID non-Hospitalized	0.131507	31.9989
COVID non-Hospitalized	0.0328767	31.9989
COVID non-Hospitalized	15.9452	47.625
COVID non-Hospitalized	16.3726	47.625
COVID non-Hospitalized	21.5342	47.625
COVID non-Hospitalized	18.8384	47.625
COVID non-Hospitalized	12.0329	47.625
COVID non-Hospitalized	0.131507	31.9989
COVID non-Hospitalized	16.0438	47.625
COVID non-Hospitalized	18.4767	47.625
COVID non-Hospitalized	0.624658	32.1996
COVID non-Hospitalized	0.0986301	32.1996
COVID non-Hospitalized	0.131507	32.2504
COVID non-Hospitalized	0.131507	32.2504
COVID non-Hospitalized	0.0986301	32.258
COVID non-Hospitalized	0.493151	32.3012
COVID non-Hospitalized	0.0657534	32.385
COVID non-Hospitalized	0.131507	32.385
COVID non-Hospitalized	0.0986301	32.385
COVID non-Hospitalized	0.0986301	32.385
COVID non-Hospitalized	0.19726	32.385
COVID non-Hospitalized	0.230137	32.385
COVID non-Hospitalized	0.394521	32.385
COVID non-Hospitalized	18.5753	47.625
COVID non-Hospitalized	14.0712	47.625
COVID non-Hospitalized	0.131507	32.4993
COVID non-Hospitalized	12.0986	47.625
COVID non-Hospitalized	0.986301	32.4993
COVID non-Hospitalized	13.8082	47.625
COVID non-Hospitalized	15.0247	47.625
COVID non-Hospitalized	15.4192	47.625
COVID non-Hospitalized	0.0328767	32.4993
COVID non-Hospitalized	0.0328767	32.4993
COVID non-Hospitalized	0.0328767	32.4993
COVID non-Hospitalized	0.0328767	32.4993
COVID non-Hospitalized	0.0328767	32.4993
COVID non-Hospitalized	13.3808	47.625
COVID non-Hospitalized	12.6575	47.625
COVID non-Hospitalized	10.4219	47.625
COVID non-Hospitalized	6.87123	47.5996
COVID non-Hospitalized	0.131507	32.4993
COVID non-Hospitalized	0.0328767	32.4993
COVID non-Hospitalized	17.7205	47.5005
COVID non-Hospitalized	18.1151	47.5005
COVID non-Hospitalized	15.0575	47.5005
COVID non-Hospitalized	12.1315	47.5005
COVID non-Hospitalized	9.10685	47.5005
COVID non-Hospitalized	15.7479	47.5005
COVID non-Hospitalized	15.2219	47.5005
COVID non-Hospitalized	0.0657534	32.4993
COVID non-Hospitalized	0.0328767	32.4993
COVID non-Hospitalized	0.0657534	32.4993
COVID non-Hospitalized	20.5808	47.5005
COVID non-Hospitalized	18.411	47.5005
COVID non-Hospitalized	18.2795	47.5005
COVID non-Hospitalized	0.0328767	32.4993
COVID non-Hospitalized	0.0986301	32.4993
COVID non-Hospitalized	0.657534	32.4993
COVID non-Hospitalized	0.0328767	32.4993
COVID non-Hospitalized	0.0328767	32.4993
COVID non-Hospitalized	15.4192	47.5005
COVID non-Hospitalized	12.1644	47.5005
COVID non-Hospitalized	18.0493	47.5005
COVID non-Hospitalized	12.0329	47.5005
COVID non-Hospitalized	17.2603	47.5005
COVID non-Hospitalized	10.4219	47.5005
COVID non-Hospitalized	0.0328767	32.4993
COVID non-Hospitalized	0.0657534	32.4993
COVID non-Hospitalized	9.79726	47.5005
COVID non-Hospitalized	0.0986301	32.4993
COVID non-Hospitalized	12.1315	47.5005
COVID non-Hospitalized	13.0521	47.5005
COVID non-Hospitalized	12.1644	47.5005
COVID non-Hospitalized	8.97534	47.5005
COVID non-Hospitalized	7.39726	47.498
COVID non-Hospitalized	0.0328767	32.4993
COVID non-Hospitalized	12.1315	47.498
COVID non-Hospitalized	13.0521	47.498
COVID non-Hospitalized	19.1671	47.3989
COVID non-Hospitalized	10.6849	47.2999
COVID non-Hospitalized	12.6575	47.2491
COVID non-Hospitalized	0.0328767	32.4993
COVID non-Hospitalized	0.0328767	32.4993
COVID non-Hospitalized	0.0328767	32.4993
COVID non-Hospitalized	0.131507	32.4993
COVID non-Hospitalized	0.328767	32.4993
COVID non-Hospitalized	0.0328767	32.4993
COVID non-Hospitalized	15.0575	47.244
COVID non-Hospitalized	18.2795	47.244
COVID non-Hospitalized	0.821918	32.4993
COVID non-Hospitalized	18.2137	47.244
COVID non-Hospitalized	0.0657534	32.4993
COVID non-Hospitalized	0.131507	32.4993
COVID non-Hospitalized	12.5589	47.244
COVID non-Hospitalized	18.0164	47.244
COVID non-Hospitalized	15.4192	47.244
COVID non-Hospitalized	15.1233	47.244
COVID non-Hospitalized	12.0986	47.244
COVID non-Hospitalized	9.30411	47.2008
COVID non-Hospitalized	12.5918	47.2008
COVID non-Hospitalized	19.3315	47.0992
COVID non-Hospitalized	12.1644	47.0992
COVID non-Hospitalized	14.0712	47.0002
COVID non-Hospitalized	17.9836	47.0002
COVID non-Hospitalized	0.131507	32.512
COVID non-Hospitalized	0.0657534	32.512
COVID non-Hospitalized	0.328767	32.6009
COVID non-Hospitalized	0.0986301	32.7508
COVID non-Hospitalized	0.164384	32.766
COVID non-Hospitalized	0.0657534	32.766
COVID non-Hospitalized	0.0657534	32.799
COVID non-Hospitalized	15.0247	47.0002
COVID non-Hospitalized	0.361644	32.799
COVID non-Hospitalized	12.0658	47.0002
COVID non-Hospitalized	12.4274	47.0002
COVID non-Hospitalized	12.4603	47.0002
COVID non-Hospitalized	14.2356	47.0002
COVID non-Hospitalized	15.2219	47.0002
COVID non-Hospitalized	18.0822	47.0002
COVID non-Hospitalized	9.56712	47.0002
COVID non-Hospitalized	12.7562	47.0002
COVID non-Hospitalized	0.723288	32.9997
COVID non-Hospitalized	0.361644	32.9997
COVID non-Hospitalized	0.0986301	32.9997
COVID non-Hospitalized	0.0657534	32.9997
COVID non-Hospitalized	0.0328767	32.9997
COVID non-Hospitalized	0.0657534	32.9997
COVID non-Hospitalized	0.0657534	32.9997
COVID non-Hospitalized	0.0328767	32.9997
COVID non-Hospitalized	0.0328767	32.9997
COVID non-Hospitalized	12.263	47.0002
COVID non-Hospitalized	0.0328767	32.9997
COVID non-Hospitalized	0.230137	32.9997
COVID non-Hospitalized	0.0328767	32.9997
COVID non-Hospitalized	0.0657534	32.9997
COVID non-Hospitalized	0.0986301	32.9997
COVID non-Hospitalized	15.9123	47.0002
COVID non-Hospitalized	0.0986301	32.9997
COVID non-Hospitalized	0.0328767	32.9997
COVID non-Hospitalized	15.1562	47.0002
COVID non-Hospitalized	21.9616	47.0002
COVID non-Hospitalized	23.1781	47.0002
COVID non-Hospitalized	9.10685	47.0002
COVID non-Hospitalized	21.6986	47.0002
COVID non-Hospitalized	18.0164	47.0002
COVID non-Hospitalized	0.131507	32.9997
COVID non-Hospitalized	7.16712	47.0002
COVID non-Hospitalized	15.6164	47.0002
COVID non-Hospitalized	18.1479	47.0002
COVID non-Hospitalized	0.690411	32.9997
COVID non-Hospitalized	19.6274	47.0002
COVID non-Hospitalized	10.3562	47.0002
COVID non-Hospitalized	19.3315	47.0002
COVID non-Hospitalized	13.6438	47.0002
COVID non-Hospitalized	9.66575	47.0002
COVID non-Hospitalized	12.6575	47.0002
COVID non-Hospitalized	14.1041	47.0002
COVID non-Hospitalized	12.0658	47.0002
COVID non-Hospitalized	14.4329	47.0002
COVID non-Hospitalized	16.4712	47.0002
COVID non-Hospitalized	18.7726	47.0002
COVID non-Hospitalized	0.0657534	32.9997
COVID non-Hospitalized	0.427397	32.9997
COVID non-Hospitalized	0.657534	32.9997
COVID non-Hospitalized	16.2411	47.0002
COVID non-Hospitalized	19.0027	47.0002
COVID non-Hospitalized	12.3288	47.0002
COVID non-Hospitalized	13.7096	47.0002
COVID non-Hospitalized	16.7014	47.0002
COVID non-Hospitalized	0.0328767	32.9997
COVID non-Hospitalized	0.0986301	32.9997
COVID non-Hospitalized	15.5836	47.0002
COVID non-Hospitalized	12.7233	47.0002
COVID non-Hospitalized	0.131507	32.9997
COVID non-Hospitalized	0.0328767	32.9997
COVID non-Hospitalized	0.131507	32.9997
COVID non-Hospitalized	7.79178	47.0002
COVID non-Hospitalized	14.2685	47.0002
COVID non-Hospitalized	15.3863	47.0002
COVID non-Hospitalized	0.0328767	32.9997
COVID non-Hospitalized	0.0657534	32.9997
COVID non-Hospitalized	12.526	47.0002
COVID non-Hospitalized	10.2247	47.0002
COVID non-Hospitalized	12.789	47.0002
COVID non-Hospitalized	13.1507	47.0002
COVID non-Hospitalized	8.21918	47.0002
COVID non-Hospitalized	9.13973	47.0002
COVID non-Hospitalized	12.1315	47.0002
COVID non-Hospitalized	12.0329	47.0002
COVID non-Hospitalized	9.56712	47.0002
COVID non-Hospitalized	12.3616	47.0002
COVID non-Hospitalized	11.5068	47.0002
COVID non-Hospitalized	12.1644	47.0002
COVID non-Hospitalized	9.50137	47.0002
COVID non-Hospitalized	9.23836	47.0002
COVID non-Hospitalized	9.20548	47.0002
COVID non-Hospitalized	7.46301	47.0002
COVID non-Hospitalized	12.5589	46.99
COVID non-Hospitalized	14.6301	46.99
COVID non-Hospitalized	0.0986301	32.9997
COVID non-Hospitalized	0.131507	32.9997
COVID non-Hospitalized	0.164384	32.9997
COVID non-Hospitalized	19.4301	46.99
COVID non-Hospitalized	15.4521	46.99
COVID non-Hospitalized	12.3288	46.99
COVID non-Hospitalized	9.6	46.99
COVID non-Hospitalized	0.0328767	32.9997
COVID non-Hospitalized	9.63288	46.99
COVID non-Hospitalized	9.36986	46.99
COVID non-Hospitalized	8.90959	46.99
COVID non-Hospitalized	9.0411	46.99
COVID non-Hospitalized	15.4521	46.99
COVID non-Hospitalized	12.6575	46.99
COVID non-Hospitalized	12.0658	46.99
COVID non-Hospitalized	0.0986301	32.9997
COVID non-Hospitalized	12.2959	46.99
COVID non-Hospitalized	14.9589	46.99
COVID non-Hospitalized	17.9836	46.99
COVID non-Hospitalized	12.263	46.99
COVID non-Hospitalized	12	46.99
COVID non-Hospitalized	16.8986	46.99
COVID non-Hospitalized	0.0657534	32.9997
COVID non-Hospitalized	0.29589	32.9997
COVID non-Hospitalized	13.7425	46.99
COVID non-Hospitalized	18.3452	46.99
COVID non-Hospitalized	14.3342	46.99
COVID non-Hospitalized	0.131507	32.9997
COVID non-Hospitalized	0.0986301	32.9997
COVID non-Hospitalized	0.0986301	32.9997
COVID non-Hospitalized	0.0657534	32.9997
COVID non-Hospitalized	0.0328767	32.9997
COVID non-Hospitalized	18.9041	46.99
COVID non-Hospitalized	0.0328767	32.9997
COVID non-Hospitalized	0.0328767	32.9997
COVID non-Hospitalized	0.19726	32.9997
COVID non-Hospitalized	0.0986301	32.9997
COVID non-Hospitalized	0.328767	32.9997
COVID non-Hospitalized	0.986301	32.9997
COVID non-Hospitalized	0.361644	32.9997
COVID non-Hospitalized	0.29589	32.9997
COVID non-Hospitalized	9.00822	46.99
COVID non-Hospitalized	0.131507	32.9997
COVID non-Hospitalized	0.131507	32.9997
COVID non-Hospitalized	0.19726	32.9997
COVID non-Hospitalized	0.0657534	32.9997
COVID non-Hospitalized	0.0657534	32.9997
COVID non-Hospitalized	12.2301	46.99
COVID non-Hospitalized	0.789041	32.9997
COVID non-Hospitalized	0.0328767	32.9997
COVID non-Hospitalized	0.0657534	32.9997
COVID non-Hospitalized	0.591781	32.9997
COVID non-Hospitalized	0.0328767	32.9997
COVID non-Hospitalized	0.0328767	32.9997
COVID non-Hospitalized	15.9781	46.99
COVID non-Hospitalized	0.0328767	32.9997
COVID non-Hospitalized	0.0657534	32.9997
COVID non-Hospitalized	0.164384	32.9997
COVID non-Hospitalized	0.460274	32.9997
COVID non-Hospitalized	0.0328767	32.9997
COVID non-Hospitalized	0.0657534	32.9997
COVID non-Hospitalized	0.164384	32.9997
COVID non-Hospitalized	0.0986301	32.9997
COVID non-Hospitalized	15.1562	46.99
COVID non-Hospitalized	18.6082	46.99
COVID non-Hospitalized	0.0986301	32.9997
COVID non-Hospitalized	0.0328767	32.9997
COVID non-Hospitalized	0.0328767	32.9997
COVID non-Hospitalized	0.0328767	32.9997
COVID non-Hospitalized	9.46849	46.99
COVID non-Hospitalized	9.53425	46.99
COVID non-Hospitalized	0.164384	33.02
COVID non-Hospitalized	0.131507	33.02
COVID non-Hospitalized	0.131507	33.02
COVID non-Hospitalized	0.0986301	33.02
COVID non-Hospitalized	0.164384	33.02
COVID non-Hospitalized	0.131507	33.02
COVID non-Hospitalized	0.131507	33.02
COVID non-Hospitalized	0.328767	33.02
COVID non-Hospitalized	0.164384	33.02
COVID non-Hospitalized	0.19726	33.02
COVID non-Hospitalized	0.164384	33.02
COVID non-Hospitalized	0.131507	33.02
COVID non-Hospitalized	0.0986301	33.02
COVID non-Hospitalized	0.0986301	33.02
COVID non-Hospitalized	0.0986301	33.02
COVID non-Hospitalized	0.19726	33.02
COVID non-Hospitalized	0.0657534	33.02
COVID non-Hospitalized	0.0986301	33.02
COVID non-Hospitalized	0.164384	33.02
COVID non-Hospitalized	0.0986301	33.02
COVID non-Hospitalized	0.0986301	33.02
COVID non-Hospitalized	0.29589	33.02
COVID non-Hospitalized	0.427397	33.02
COVID non-Hospitalized	0.0986301	33.02
COVID non-Hospitalized	0.0986301	33.02
COVID non-Hospitalized	0.131507	33.02
COVID non-Hospitalized	0.131507	33.02
COVID non-Hospitalized	0.0657534	33.02
COVID non-Hospitalized	0.131507	33.02
COVID non-Hospitalized	0.361644	33.02
COVID non-Hospitalized	0.131507	33.02
COVID non-Hospitalized	0.361644	33.02
COVID non-Hospitalized	15.4849	46.99
COVID non-Hospitalized	10.4219	46.99
COVID non-Hospitalized	0.0986301	33.02
COVID non-Hospitalized	0.131507	33.02
COVID non-Hospitalized	0.493151	33.02
COVID non-Hospitalized	0.131507	33.02
COVID non-Hospitalized	0.131507	33.02
COVID non-Hospitalized	0.19726	33.02
COVID non-Hospitalized	0.920548	33.02
COVID non-Hospitalized	0.0986301	33.02
COVID non-Hospitalized	0.0986301	33.02
COVID non-Hospitalized	0.328767	33.02
COVID non-Hospitalized	0.263014	33.02
COVID non-Hospitalized	0.131507	33.02
COVID non-Hospitalized	0.131507	33.02
COVID non-Hospitalized	0.131507	33.02
COVID non-Hospitalized	0.0986301	33.2003
COVID non-Hospitalized	0.0657534	33.2003
COVID non-Hospitalized	0.0986301	33.2003
COVID non-Hospitalized	0.0328767	33.401
COVID non-Hospitalized	0.394521	33.401
COVID non-Hospitalized	6.67397	46.99
COVID non-Hospitalized	16.537	46.99
COVID non-Hospitalized	12.6247	46.99
COVID non-Hospitalized	0.29589	33.5001
COVID non-Hospitalized	0.0328767	33.5001
COVID non-Hospitalized	0.0657534	33.5001
COVID non-Hospitalized	0.164384	33.5001
COVID non-Hospitalized	0.164384	33.5001
COVID non-Hospitalized	0.131507	33.5001
COVID non-Hospitalized	0.0328767	33.5001
COVID non-Hospitalized	0.164384	33.5001
COVID non-Hospitalized	0.164384	33.5001
COVID non-Hospitalized	0.263014	33.5001
COVID non-Hospitalized	0.0986301	33.5001
COVID non-Hospitalized	0.887671	33.5001
COVID non-Hospitalized	0.526027	33.5001
COVID non-Hospitalized	12.1644	46.99
COVID non-Hospitalized	15.6493	46.99
COVID non-Hospitalized	0.0328767	33.5001
COVID non-Hospitalized	0.131507	33.5001
COVID non-Hospitalized	10.5863	46.99
COVID non-Hospitalized	13.2493	46.99
COVID non-Hospitalized	0.19726	33.5001
COVID non-Hospitalized	18.674	46.99
COVID non-Hospitalized	0.164384	33.5001
COVID non-Hospitalized	0.164384	33.5001
COVID non-Hospitalized	0.164384	33.5001
COVID non-Hospitalized	0.19726	33.5001
COVID non-Hospitalized	14.663	46.99
COVID non-Hospitalized	15.0575	46.99
COVID non-Hospitalized	15.5178	46.99
COVID non-Hospitalized	0.0986301	33.5001
COVID non-Hospitalized	0.29589	33.5001
COVID non-Hospitalized	15.6493	46.99
COVID non-Hospitalized	9.33699	46.99
COVID non-Hospitalized	15.0575	46.99
COVID non-Hospitalized	12.1315	46.99
COVID non-Hospitalized	18.3123	46.99
COVID non-Hospitalized	13.0521	46.99
COVID non-Hospitalized	15.1562	46.99
COVID non-Hospitalized	16.1425	46.99
COVID non-Hospitalized	7.36438	46.99
COVID non-Hospitalized	12.263	46.99
COVID non-Hospitalized	14.3671	46.99
COVID non-Hospitalized	16.3068	46.99
COVID non-Hospitalized	12.5589	46.99
COVID non-Hospitalized	14.9918	46.99
COVID non-Hospitalized	9.69863	46.99
COVID non-Hospitalized	18.8712	46.99
COVID non-Hospitalized	0.0328767	33.5001
COVID non-Hospitalized	0.0328767	33.5001
COVID non-Hospitalized	0.0328767	33.5001
COVID non-Hospitalized	11.8027	46.99
COVID non-Hospitalized	0.0657534	33.5001
COVID non-Hospitalized	15.6164	46.99
COVID non-Hospitalized	13.0192	46.99
COVID non-Hospitalized	15.0904	46.99
COVID non-Hospitalized	12.6247	46.99
COVID non-Hospitalized	12.8548	46.99
COVID non-Hospitalized	9.20548	46.99
COVID non-Hospitalized	0.0328767	33.5001
COVID non-Hospitalized	8.94247	46.99
COVID non-Hospitalized	12.2959	46.99
COVID non-Hospitalized	0.789041	33.5001
COVID non-Hospitalized	0.0657534	33.5001
COVID non-Hospitalized	12.3616	46.99
COVID non-Hospitalized	0.164384	33.5001
COVID non-Hospitalized	0.29589	33.5001
COVID non-Hospitalized	0.0328767	33.5001
COVID non-Hospitalized	0.0657534	33.5001
COVID non-Hospitalized	0.19726	33.5001
COVID non-Hospitalized	9.30411	46.99
COVID non-Hospitalized	12.0329	46.99
COVID non-Hospitalized	16.3068	46.99
COVID non-Hospitalized	0.0657534	33.5001
COVID non-Hospitalized	14.0055	46.99
COVID non-Hospitalized	12.4274	46.99
COVID non-Hospitalized	0.0328767	33.5001
COVID non-Hospitalized	14.3671	46.99
COVID non-Hospitalized	0.0328767	33.5001
COVID non-Hospitalized	9.53425	46.99
COVID non-Hospitalized	0.164384	33.5001
COVID non-Hospitalized	12.4932	46.99
COVID non-Hospitalized	0.29589	33.5001
COVID non-Hospitalized	12.1644	46.99
COVID non-Hospitalized	8.71233	46.99
COVID non-Hospitalized	9.33699	46.99
COVID non-Hospitalized	13.2164	46.99
COVID non-Hospitalized	10.2904	46.99
COVID non-Hospitalized	12.6575	46.99
COVID non-Hospitalized	12.8877	46.99
COVID non-Hospitalized	10.2575	46.99
COVID non-Hospitalized	12.9534	46.99
COVID non-Hospitalized	12.4274	46.99
COVID non-Hospitalized	9.66575	46.99
COVID non-Hospitalized	12.6575	46.99
COVID non-Hospitalized	9.83014	46.99
COVID non-Hospitalized	12.4603	46.99
COVID non-Hospitalized	12.1644	46.99
COVID non-Hospitalized	9.07397	46.99
COVID non-Hospitalized	9.40274	46.99
COVID non-Hospitalized	10.389	46.99
COVID non-Hospitalized	9.07397	46.99
COVID non-Hospitalized	4.96438	46.99
COVID non-Hospitalized	8.38356	46.7995
COVID non-Hospitalized	0.0328767	33.5001
COVID non-Hospitalized	0.0328767	33.5001
COVID non-Hospitalized	0.0657534	33.5001
COVID non-Hospitalized	0.0986301	33.5001
COVID non-Hospitalized	0.0986301	33.5001
COVID non-Hospitalized	0.0657534	33.5001
COVID non-Hospitalized	0.164384	33.5001
COVID non-Hospitalized	0.263014	33.5001
COVID non-Hospitalized	0.164384	33.5001
COVID non-Hospitalized	0.0328767	33.5001
COVID non-Hospitalized	0.0657534	33.5001
COVID non-Hospitalized	20.7123	46.736
COVID non-Hospitalized	7.29863	46.736
COVID non-Hospitalized	7.06849	46.736
COVID non-Hospitalized	0.0328767	33.5001
COVID non-Hospitalized	0.0657534	33.5001
COVID non-Hospitalized	0.0986301	33.5001
COVID non-Hospitalized	0.0657534	33.5001
COVID non-Hospitalized	12.3288	46.736
COVID non-Hospitalized	10.8493	46.736
COVID non-Hospitalized	10.0932	46.736
COVID non-Hospitalized	10.0932	46.736
COVID non-Hospitalized	15.2219	46.7004
COVID non-Hospitalized	21.7973	46.7004
COVID non-Hospitalized	12.1644	46.7004
COVID non-Hospitalized	9.83014	46.609
COVID non-Hospitalized	13.5123	46.4998
COVID non-Hospitalized	13.3151	46.4998
COVID non-Hospitalized	8.94247	46.4998
COVID non-Hospitalized	0.0328767	33.5001
COVID non-Hospitalized	0.0328767	33.5001
COVID non-Hospitalized	0.591781	33.5001
COVID non-Hospitalized	19.7918	46.4998
COVID non-Hospitalized	0.131507	33.5001
COVID non-Hospitalized	0.263014	33.5001
COVID non-Hospitalized	11.0466	46.4998
COVID non-Hospitalized	12.3616	46.4998
COVID non-Hospitalized	15.189	46.4998
COVID non-Hospitalized	0.0657534	33.528
COVID non-Hospitalized	0.131507	33.528
COVID non-Hospitalized	0.0986301	33.528
COVID non-Hospitalized	0.131507	33.528
COVID non-Hospitalized	0.0986301	33.528
COVID non-Hospitalized	0.164384	33.528
COVID non-Hospitalized	0.0986301	33.528
COVID non-Hospitalized	0.131507	33.528
COVID non-Hospitalized	0.328767	33.655
COVID non-Hospitalized	0.427397	33.655
COVID non-Hospitalized	0.164384	33.655
COVID non-Hospitalized	0.0986301	33.655
COVID non-Hospitalized	0.164384	33.655
COVID non-Hospitalized	0.0986301	33.655
COVID non-Hospitalized	0.0986301	33.655
COVID non-Hospitalized	0.0986301	33.655
COVID non-Hospitalized	0.131507	33.655
COVID non-Hospitalized	0.131507	33.655
COVID non-Hospitalized	0.0328767	33.7007
COVID non-Hospitalized	0.0986301	33.749
COVID non-Hospitalized	0.0657534	33.749
COVID non-Hospitalized	0.131507	33.749
COVID non-Hospitalized	0.0328767	33.749
COVID non-Hospitalized	0.0657534	33.7998
COVID non-Hospitalized	0.0657534	33.7998
COVID non-Hospitalized	0.0328767	33.7998
COVID non-Hospitalized	0.0657534	34.0004
COVID non-Hospitalized	15.0575	46.4998
COVID non-Hospitalized	12.3288	46.4998
COVID non-Hospitalized	16.3397	46.4998
COVID non-Hospitalized	20.6137	46.4998
COVID non-Hospitalized	9.56712	46.4998
COVID non-Hospitalized	10.7178	46.4998
COVID non-Hospitalized	0.29589	34.0004
COVID non-Hospitalized	0.19726	34.0004
COVID non-Hospitalized	0.164384	34.0004
COVID non-Hospitalized	0.0657534	34.0004
COVID non-Hospitalized	0.0328767	34.0004
COVID non-Hospitalized	15.3863	46.4998
COVID non-Hospitalized	0.624658	34.0004
COVID non-Hospitalized	0.0657534	34.0004
COVID non-Hospitalized	0.0986301	34.0004
COVID non-Hospitalized	0.131507	34.0004
COVID non-Hospitalized	0.0328767	34.0004
COVID non-Hospitalized	0.0986301	34.0004
COVID non-Hospitalized	0.131507	34.0004
COVID non-Hospitalized	0.953425	34.0004
COVID non-Hospitalized	0.0328767	34.0004
COVID non-Hospitalized	9.10685	46.4998
COVID non-Hospitalized	0.0328767	34.0004
COVID non-Hospitalized	8.1863	46.4998
COVID non-Hospitalized	0.0328767	34.0004
COVID non-Hospitalized	0.0657534	34.0004
COVID non-Hospitalized	12.1315	46.4998
COVID non-Hospitalized	9.0411	46.4998
COVID non-Hospitalized	6.87123	46.4998
COVID non-Hospitalized	10.2575	46.4998
COVID non-Hospitalized	0.164384	34.0004
COVID non-Hospitalized	7.06849	46.4998
COVID non-Hospitalized	6.01644	46.4998
COVID non-Hospitalized	6.11507	46.4998
COVID non-Hospitalized	9.07397	46.4998
COVID non-Hospitalized	12.1644	46.482
COVID non-Hospitalized	15.8137	46.482
COVID non-Hospitalized	0.131507	34.0004
COVID non-Hospitalized	9.20548	46.482
COVID non-Hospitalized	0.0657534	34.0004
COVID non-Hospitalized	12.526	46.482
COVID non-Hospitalized	12.3616	46.482
COVID non-Hospitalized	9.66575	46.482
COVID non-Hospitalized	23.9014	46.4007
COVID non-Hospitalized	18.3123	46.4007
COVID non-Hospitalized	0.460274	34.0004
COVID non-Hospitalized	17.9178	46.355
COVID non-Hospitalized	14.4	46.355
COVID non-Hospitalized	12.8219	46.355
COVID non-Hospitalized	22.0274	46.355
COVID non-Hospitalized	13.1178	46.355
COVID non-Hospitalized	18.2137	46.355
COVID non-Hospitalized	0.0328767	34.0004
COVID non-Hospitalized	0.0657534	34.0004
COVID non-Hospitalized	0.0328767	34.0004
COVID non-Hospitalized	0.0986301	34.0004
COVID non-Hospitalized	13.4466	46.355
COVID non-Hospitalized	15.3205	46.355
COVID non-Hospitalized	0.131507	34.0004
COVID non-Hospitalized	0.0328767	34.0004
COVID non-Hospitalized	10.5205	46.355
COVID non-Hospitalized	13.3151	46.355
COVID non-Hospitalized	0.263014	34.0004
COVID non-Hospitalized	10.0932	46.355
COVID non-Hospitalized	12.0658	46.355
COVID non-Hospitalized	12.0658	46.355
COVID non-Hospitalized	0.427397	34.0004
COVID non-Hospitalized	0.0328767	34.0004
COVID non-Hospitalized	6.87123	46.355
COVID non-Hospitalized	13.2822	46.355
COVID non-Hospitalized	12.8548	46.355
COVID non-Hospitalized	15.1233	46.355
COVID non-Hospitalized	10.0603	46.355
COVID non-Hospitalized	0.0986301	34.0004
COVID non-Hospitalized	14.0712	46.355
COVID non-Hospitalized	15.4849	46.355
COVID non-Hospitalized	12.3945	46.355
COVID non-Hospitalized	13.1836	46.355
COVID non-Hospitalized	9.27123	46.355
COVID non-Hospitalized	9.69863	46.355
COVID non-Hospitalized	13.0849	46.355
COVID non-Hospitalized	15.0904	46.355
COVID non-Hospitalized	0.29589	34.0004
COVID non-Hospitalized	0.328767	34.0004
COVID non-Hospitalized	9.13973	46.355
COVID non-Hospitalized	6.7726	46.355
COVID non-Hospitalized	6.44384	46.355
COVID non-Hospitalized	12.263	46.2991
COVID non-Hospitalized	0.0328767	34.0004
COVID non-Hospitalized	17.6219	46.228
COVID non-Hospitalized	10.1918	46.228
COVID non-Hospitalized	0.131507	34.0004
COVID non-Hospitalized	15.0247	46.228
COVID non-Hospitalized	0.0657534	34.0004
COVID non-Hospitalized	0.230137	34.0004
COVID non-Hospitalized	15.0904	46.228
COVID non-Hospitalized	20.4164	46.228
COVID non-Hospitalized	12.0329	46.228
COVID non-Hospitalized	12.0329	46.228
COVID non-Hospitalized	0.0657534	34.0004
COVID non-Hospitalized	9.10685	46.228
COVID non-Hospitalized	0.0657534	34.0004
COVID non-Hospitalized	0.0328767	34.0004
COVID non-Hospitalized	0.427397	34.0004
COVID non-Hospitalized	0.0657534	34.0004
COVID non-Hospitalized	0.131507	34.0004
COVID non-Hospitalized	12.1644	46.228
COVID non-Hospitalized	0.0328767	34.0004
COVID non-Hospitalized	0.131507	34.0004
COVID non-Hospitalized	0.131507	34.0004
COVID non-Hospitalized	10.0603	46.228
COVID non-Hospitalized	10.0603	46.228
COVID non-Hospitalized	9.1726	46.228
COVID non-Hospitalized	12.0658	46.228
COVID non-Hospitalized	0.0657534	34.0004
COVID non-Hospitalized	15.0247	45.9994
COVID non-Hospitalized	9.99452	45.9994
COVID non-Hospitalized	15.0575	45.9994
COVID non-Hospitalized	18.4438	45.9994
COVID non-Hospitalized	6.24658	45.9994
COVID non-Hospitalized	19.3315	45.9994
COVID non-Hospitalized	0.131507	34.0004
COVID non-Hospitalized	9.23836	45.9994
COVID non-Hospitalized	15.0247	45.9994
COVID non-Hospitalized	0.0986301	34.0004
COVID non-Hospitalized	6.24658	45.9994
COVID non-Hospitalized	18.0493	45.9994
COVID non-Hospitalized	16.7671	45.9994
COVID non-Hospitalized	18.3452	45.9994
COVID non-Hospitalized	9.20548	45.9994
COVID non-Hospitalized	0.0328767	34.0004
COVID non-Hospitalized	8.71233	45.9994
COVID non-Hospitalized	12.2301	45.9994
COVID non-Hospitalized	12.6247	45.9994
COVID non-Hospitalized	14.0384	45.9994
COVID non-Hospitalized	14.1699	45.9994
COVID non-Hospitalized	9.00822	45.9994
COVID non-Hospitalized	0.821918	34.0004
COVID non-Hospitalized	12.4932	45.9994
COVID non-Hospitalized	0.0986301	34.0004
COVID non-Hospitalized	11.9342	45.9994
COVID non-Hospitalized	0.0328767	34.0004
COVID non-Hospitalized	0.0328767	34.0004
COVID non-Hospitalized	0.0657534	34.0004
COVID non-Hospitalized	15.8137	45.9994
COVID non-Hospitalized	0.0328767	34.0004
COVID non-Hospitalized	0.0657534	34.0004
COVID non-Hospitalized	0.131507	34.0004
COVID non-Hospitalized	0.0328767	34.0004
COVID non-Hospitalized	0.361644	34.0004
COVID non-Hospitalized	0.0328767	34.0004
COVID non-Hospitalized	0.0657534	34.0004
COVID non-Hospitalized	0.19726	34.0004
COVID non-Hospitalized	12.0329	45.9994
COVID non-Hospitalized	9.96164	45.9994
COVID non-Hospitalized	12.5589	45.9994
COVID non-Hospitalized	12.5589	45.9994
COVID non-Hospitalized	0.0328767	34.0004
COVID non-Hospitalized	0.0657534	34.0004
COVID non-Hospitalized	0.19726	34.0004
COVID non-Hospitalized	0.19726	34.0004
COVID non-Hospitalized	0.0986301	34.0004
COVID non-Hospitalized	0.0986301	34.0004
COVID non-Hospitalized	0.0657534	34.0004
COVID non-Hospitalized	0.0328767	34.0004
COVID non-Hospitalized	0.0657534	34.0004
COVID non-Hospitalized	0.0986301	34.0004
COVID non-Hospitalized	0.0986301	34.0004
COVID non-Hospitalized	0.789041	34.0004
COVID non-Hospitalized	0.0328767	34.0004
COVID non-Hospitalized	11.9342	45.9994
COVID non-Hospitalized	0.164384	34.0004
COVID non-Hospitalized	0.0986301	34.0004
COVID non-Hospitalized	0.0986301	34.0004
COVID non-Hospitalized	0.263014	34.0004
COVID non-Hospitalized	0.0986301	34.0004
COVID non-Hospitalized	0.328767	34.0004
COVID non-Hospitalized	9.0411	45.9994
COVID non-Hospitalized	17.0301	45.9994
COVID non-Hospitalized	14.4	45.9994
COVID non-Hospitalized	18.2137	45.9994
COVID non-Hospitalized	0.526027	34.0004
COVID non-Hospitalized	6.18082	45.9994
COVID non-Hospitalized	15.2877	45.9994
COVID non-Hospitalized	7.72603	45.9994
COVID non-Hospitalized	9.89589	45.9994
COVID non-Hospitalized	12.2959	45.9994
COVID non-Hospitalized	0.164384	34.0004
COVID non-Hospitalized	0.0328767	34.0004
COVID non-Hospitalized	0.0986301	34.0004
COVID non-Hospitalized	0.0328767	34.0004
COVID non-Hospitalized	0.394521	34.0004
COVID non-Hospitalized	0.0657534	34.0004
COVID non-Hospitalized	0.0328767	34.0004
COVID non-Hospitalized	0.0657534	34.0004
COVID non-Hospitalized	13.7096	45.9994
COVID non-Hospitalized	0.0328767	34.0004
COVID non-Hospitalized	12.4603	45.9994
COVID non-Hospitalized	12.0986	45.9994
COVID non-Hospitalized	10.9808	45.9994
COVID non-Hospitalized	0.0328767	34.0004
COVID non-Hospitalized	0.328767	34.0004
COVID non-Hospitalized	0.394521	34.0004
COVID non-Hospitalized	0.19726	34.0004
COVID non-Hospitalized	13.2493	45.9994
COVID non-Hospitalized	0.723288	34.0004
COVID non-Hospitalized	9.46849	45.9994
COVID non-Hospitalized	0.328767	34.0004
COVID non-Hospitalized	11.4082	45.9994
COVID non-Hospitalized	6.34521	45.9994
COVID non-Hospitalized	10.7507	45.9994
COVID non-Hospitalized	12.1973	45.9994
COVID non-Hospitalized	0.0986301	34.0004
COVID non-Hospitalized	9.92877	45.9994
COVID non-Hospitalized	9.07397	45.9994
COVID non-Hospitalized	6.57534	45.9994
COVID non-Hospitalized	0.131507	34.0004
COVID non-Hospitalized	0.29589	34.0004
COVID non-Hospitalized	9.89589	45.9994
COVID non-Hospitalized	6.73973	45.9994
COVID non-Hospitalized	0.0986301	34.0004
COVID non-Hospitalized	0.0986301	34.0004
COVID non-Hospitalized	9.13973	45.9994
COVID non-Hospitalized	6.83836	45.9994
COVID non-Hospitalized	9.92877	45.9994
COVID non-Hospitalized	7.03562	45.9994
COVID non-Hospitalized	6.2137	45.9994
COVID non-Hospitalized	7.33151	45.9994
COVID non-Hospitalized	9.63288	45.974
COVID non-Hospitalized	9.1726	45.974
COVID non-Hospitalized	9.0411	45.974
COVID non-Hospitalized	10.1589	45.974
COVID non-Hospitalized	12.7562	45.7987
COVID non-Hospitalized	13.0521	45.7987
COVID non-Hospitalized	20.8767	45.7505
COVID non-Hospitalized	13.2164	45.7505
COVID non-Hospitalized	0.920548	34.036
COVID non-Hospitalized	0.0986301	34.036
COVID non-Hospitalized	0.164384	34.2011
COVID non-Hospitalized	0.0986301	34.2494
COVID non-Hospitalized	0.19726	34.29
COVID non-Hospitalized	0.164384	34.29
COVID non-Hospitalized	0.19726	34.29
COVID non-Hospitalized	0.164384	34.29
COVID non-Hospitalized	0.394521	34.29
COVID non-Hospitalized	0.328767	34.29
COVID non-Hospitalized	0.0986301	34.29
COVID non-Hospitalized	0.0986301	34.29
COVID non-Hospitalized	0.0986301	34.29
COVID non-Hospitalized	0.0657534	34.29
COVID non-Hospitalized	0.164384	34.29
COVID non-Hospitalized	0.591781	34.29
COVID non-Hospitalized	0.131507	34.29
COVID non-Hospitalized	0.0986301	34.29
COVID non-Hospitalized	0.394521	34.29
COVID non-Hospitalized	0.131507	34.29
COVID non-Hospitalized	0.0986301	34.29
COVID non-Hospitalized	0.131507	34.29
COVID non-Hospitalized	0.131507	34.29
COVID non-Hospitalized	0.19726	34.29
COVID non-Hospitalized	0.164384	34.29
COVID non-Hospitalized	0.0986301	34.29
COVID non-Hospitalized	0.131507	34.29
COVID non-Hospitalized	0.394521	34.29
COVID non-Hospitalized	0.0986301	34.29
COVID non-Hospitalized	0.19726	34.29
COVID non-Hospitalized	0.328767	34.29
COVID non-Hospitalized	0.0986301	34.29
COVID non-Hospitalized	0.131507	34.29
COVID non-Hospitalized	0.131507	34.29
COVID non-Hospitalized	0.230137	34.29
COVID non-Hospitalized	0.131507	34.29
COVID non-Hospitalized	12.9863	45.72
COVID non-Hospitalized	16.2082	45.72
COVID non-Hospitalized	0.986301	34.29
COVID non-Hospitalized	0.0986301	34.29
COVID non-Hospitalized	0.131507	34.29
COVID non-Hospitalized	0.0986301	34.29
COVID non-Hospitalized	0.131507	34.29
COVID non-Hospitalized	17.1288	45.72
COVID non-Hospitalized	0.0986301	34.29
COVID non-Hospitalized	0.0657534	34.29
COVID non-Hospitalized	0.0986301	34.29
COVID non-Hospitalized	0.558904	34.29
COVID non-Hospitalized	6.01644	45.72
COVID non-Hospitalized	0.131507	34.29
COVID non-Hospitalized	0.131507	34.29
COVID non-Hospitalized	0.0986301	34.29
COVID non-Hospitalized	0.164384	34.29
COVID non-Hospitalized	0.328767	34.29
COVID non-Hospitalized	0.131507	34.29
COVID non-Hospitalized	0.0986301	34.29
COVID non-Hospitalized	0.493151	34.29
COVID non-Hospitalized	0.131507	34.29
COVID non-Hospitalized	0.0986301	34.29
COVID non-Hospitalized	0.164384	34.29
COVID non-Hospitalized	0.0986301	34.29
COVID non-Hospitalized	0.0986301	34.29
COVID non-Hospitalized	0.19726	34.29
COVID non-Hospitalized	0.361644	34.29
COVID non-Hospitalized	0.131507	34.29
COVID non-Hospitalized	15.8137	45.72
COVID non-Hospitalized	6.18082	45.72
COVID non-Hospitalized	0.328767	34.3002
COVID non-Hospitalized	7.23288	45.72
COVID non-Hospitalized	6.96986	45.72
COVID non-Hospitalized	0.657534	34.3992
COVID non-Hospitalized	15.0904	45.72
COVID non-Hospitalized	11.5397	45.72
COVID non-Hospitalized	0.821918	34.3992
COVID non-Hospitalized	4.93151	45.72
COVID non-Hospitalized	12.4603	45.72
COVID non-Hospitalized	10.4548	45.72
COVID non-Hospitalized	0.0986301	34.5008
COVID non-Hospitalized	0.0328767	34.5008
COVID non-Hospitalized	10.9808	45.72
COVID non-Hospitalized	19.3973	45.72
COVID non-Hospitalized	9.07397	45.72
COVID non-Hospitalized	12.1973	45.72
COVID non-Hospitalized	0.131507	34.5008
COVID non-Hospitalized	8.74521	45.72
COVID non-Hospitalized	12.2301	45.72
COVID non-Hospitalized	0.131507	34.5008
COVID non-Hospitalized	0.0328767	34.5008
COVID non-Hospitalized	0.0657534	34.5008
COVID non-Hospitalized	0.0328767	34.5008
COVID non-Hospitalized	6.50959	45.72
COVID non-Hospitalized	7.46301	45.72
COVID non-Hospitalized	0.0328767	34.5008
COVID non-Hospitalized	0.0657534	34.5008
COVID non-Hospitalized	0.0657534	34.5008
COVID non-Hospitalized	0.0328767	34.5008
COVID non-Hospitalized	0.131507	34.5008
COVID non-Hospitalized	4.17534	45.72
COVID non-Hospitalized	0.0986301	34.5008
COVID non-Hospitalized	11.0137	45.72
COVID non-Hospitalized	0.0657534	34.5008
COVID non-Hospitalized	6.80548	45.72
COVID non-Hospitalized	9.40274	45.72
COVID non-Hospitalized	9.1726	45.72
COVID non-Hospitalized	0.558904	34.5008
COVID non-Hospitalized	9.07397	45.72
COVID non-Hospitalized	12	45.72
COVID non-Hospitalized	0.0328767	34.5008
COVID non-Hospitalized	15.0247	45.72
COVID non-Hospitalized	18.8384	45.72
COVID non-Hospitalized	9.99452	45.72
COVID non-Hospitalized	12.6575	45.72
COVID non-Hospitalized	0.164384	34.5008
COVID non-Hospitalized	15.0575	45.72
COVID non-Hospitalized	8.67945	45.72
COVID non-Hospitalized	0.0657534	34.5008
COVID non-Hospitalized	11.0466	45.72
COVID non-Hospitalized	4.99726	45.72
COVID non-Hospitalized	0.0986301	34.5008
COVID non-Hospitalized	7.52877	45.72
COVID non-Hospitalized	12.0329	45.72
COVID non-Hospitalized	0.164384	34.5008
COVID non-Hospitalized	6.60822	45.72
COVID non-Hospitalized	10.2904	45.72
COVID non-Hospitalized	9.40274	45.72
COVID non-Hospitalized	12.0658	45.72
COVID non-Hospitalized	15.5178	45.72
COVID non-Hospitalized	12.1973	45.72
COVID non-Hospitalized	0.0657534	34.5008
COVID non-Hospitalized	6.44384	45.72
COVID non-Hospitalized	13.5452	45.72
COVID non-Hospitalized	15.1562	45.72
COVID non-Hospitalized	18.3123	45.72
COVID non-Hospitalized	9.27123	45.72
COVID non-Hospitalized	0.0657534	34.5008
COVID non-Hospitalized	12.3288	45.72
COVID non-Hospitalized	0.0328767	34.5008
COVID non-Hospitalized	6.14795	45.72
COVID non-Hospitalized	12.0329	45.72
COVID non-Hospitalized	14.9918	45.72
COVID non-Hospitalized	0.0328767	34.5008
COVID non-Hospitalized	0.0328767	34.5008
COVID non-Hospitalized	0.328767	34.5008
COVID non-Hospitalized	0.0328767	34.5008
COVID non-Hospitalized	0.0657534	34.5008
COVID non-Hospitalized	9.96164	45.72
COVID non-Hospitalized	12.3288	45.72
COVID non-Hospitalized	15.3205	45.72
COVID non-Hospitalized	0.29589	34.5008
COVID non-Hospitalized	0.0328767	34.5008
COVID non-Hospitalized	0.0986301	34.5008
COVID non-Hospitalized	0.328767	34.5008
COVID non-Hospitalized	12.3945	45.72
COVID non-Hospitalized	0.394521	34.5008
COVID non-Hospitalized	0.131507	34.5008
COVID non-Hospitalized	0.19726	34.5008
COVID non-Hospitalized	0.0328767	34.5008
COVID non-Hospitalized	0.0657534	34.5008
COVID non-Hospitalized	0.0986301	34.5008
COVID non-Hospitalized	0.0657534	34.5008
COVID non-Hospitalized	9.40274	45.72
COVID non-Hospitalized	16.1096	45.72
COVID non-Hospitalized	19.2658	45.72
COVID non-Hospitalized	0.0328767	34.5008
COVID non-Hospitalized	0.0328767	34.5008
COVID non-Hospitalized	0.0328767	34.5008
COVID non-Hospitalized	8.35068	45.72
COVID non-Hospitalized	11.2767	45.72
COVID non-Hospitalized	15.9123	45.72
COVID non-Hospitalized	0.164384	34.5008
COVID non-Hospitalized	0.0328767	34.5008
COVID non-Hospitalized	0.0328767	34.5008
COVID non-Hospitalized	0.0328767	34.5008
COVID non-Hospitalized	0.0328767	34.5008
COVID non-Hospitalized	0.526027	34.5008
COVID non-Hospitalized	0.131507	34.5008
COVID non-Hospitalized	0.460274	34.5008
COVID non-Hospitalized	0.328767	34.5008
COVID non-Hospitalized	15.1562	45.72
COVID non-Hospitalized	18.2137	45.72
COVID non-Hospitalized	0.0328767	34.5008
COVID non-Hospitalized	0.0657534	34.5008
COVID non-Hospitalized	0.0986301	34.5008
COVID non-Hospitalized	0.0328767	34.5008
COVID non-Hospitalized	6.27945	45.72
COVID non-Hospitalized	0.131507	34.5008
COVID non-Hospitalized	0.0986301	34.5008
COVID non-Hospitalized	0.0986301	34.5008
COVID non-Hospitalized	0.164384	34.5008
COVID non-Hospitalized	0.854795	34.5008
COVID non-Hospitalized	0.164384	34.5008
COVID non-Hospitalized	0.164384	34.5008
COVID non-Hospitalized	0.591781	34.5008
COVID non-Hospitalized	0.0328767	34.5008
COVID non-Hospitalized	0.0328767	34.5008
COVID non-Hospitalized	0.29589	34.5008
COVID non-Hospitalized	0.328767	34.5008
COVID non-Hospitalized	12.3288	45.72
COVID non-Hospitalized	0.0986301	34.5008
COVID non-Hospitalized	9.69863	45.72
COVID non-Hospitalized	14.1041	45.72
COVID non-Hospitalized	0.0328767	34.5008
COVID non-Hospitalized	0.0328767	34.5008
COVID non-Hospitalized	0.0328767	34.5008
COVID non-Hospitalized	8.90959	45.72
COVID non-Hospitalized	0.0328767	34.5008
COVID non-Hospitalized	21.074	45.72
COVID non-Hospitalized	0.493151	34.5008
COVID non-Hospitalized	0.131507	34.5008
COVID non-Hospitalized	9.33699	45.72
COVID non-Hospitalized	9.07397	45.72
COVID non-Hospitalized	8.21918	45.72
COVID non-Hospitalized	22.3562	45.72
COVID non-Hospitalized	15.6164	45.72
COVID non-Hospitalized	6.34521	45.72
COVID non-Hospitalized	8.94247	45.72
COVID non-Hospitalized	0.131507	34.544
COVID non-Hospitalized	9.10685	45.72
COVID non-Hospitalized	0.0986301	34.544
COVID non-Hospitalized	0.756164	34.544
COVID non-Hospitalized	0.131507	34.544
COVID non-Hospitalized	0.0986301	34.544
COVID non-Hospitalized	11.4411	45.72
COVID non-Hospitalized	0.131507	34.5999
COVID non-Hospitalized	0.789041	34.6989
COVID non-Hospitalized	0.0657534	34.6989
COVID non-Hospitalized	0.0986301	34.7497
COVID non-Hospitalized	0.131507	34.798
COVID non-Hospitalized	0.0986301	34.8005
COVID non-Hospitalized	0.131507	34.925
COVID non-Hospitalized	0.131507	34.925
COVID non-Hospitalized	0.131507	34.925
COVID non-Hospitalized	0.19726	34.925
COVID non-Hospitalized	8.48219	45.72
COVID non-Hospitalized	0.328767	34.925
COVID non-Hospitalized	0.19726	34.925
COVID non-Hospitalized	0.0986301	34.925
COVID non-Hospitalized	15.0904	45.72
COVID non-Hospitalized	0.460274	34.925
COVID non-Hospitalized	0.0986301	34.925
COVID non-Hospitalized	9.07397	45.72
COVID non-Hospitalized	12.0658	45.72
COVID non-Hospitalized	0.131507	34.925
COVID non-Hospitalized	0.0986301	34.925
COVID non-Hospitalized	0.0986301	34.925
COVID non-Hospitalized	11.1452	45.72
COVID non-Hospitalized	0.0986301	35.0012
COVID non-Hospitalized	0.263014	35.0012
COVID non-Hospitalized	9.6	45.72
COVID non-Hospitalized	12.1315	45.72
COVID non-Hospitalized	11.0137	45.72
COVID non-Hospitalized	9.79726	45.72
COVID non-Hospitalized	12.526	45.72
COVID non-Hospitalized	8.08767	45.72
COVID non-Hospitalized	0.0328767	35.0012
COVID non-Hospitalized	15.2548	45.72
COVID non-Hospitalized	10.0932	45.72
COVID non-Hospitalized	0.164384	35.0012
COVID non-Hospitalized	0.131507	35.0012
COVID non-Hospitalized	12.526	45.72
COVID non-Hospitalized	0.591781	35.0012
COVID non-Hospitalized	0.0328767	35.0012
COVID non-Hospitalized	0.0328767	35.0012
COVID non-Hospitalized	12.7562	45.72
COVID non-Hospitalized	9.69863	45.72
COVID non-Hospitalized	0.0328767	35.0012
COVID non-Hospitalized	0.0657534	35.0012
COVID non-Hospitalized	0.0328767	35.0012
COVID non-Hospitalized	0.0986301	35.0012
COVID non-Hospitalized	0.0657534	35.0012
COVID non-Hospitalized	15.8137	45.72
COVID non-Hospitalized	0.0328767	35.0012
COVID non-Hospitalized	0.0657534	35.0012
COVID non-Hospitalized	0.19726	35.0012
COVID non-Hospitalized	18.7726	45.72
COVID non-Hospitalized	0.131507	35.0012
COVID non-Hospitalized	0.0328767	35.0012
COVID non-Hospitalized	0.131507	35.0012
COVID non-Hospitalized	6.08219	45.72
COVID non-Hospitalized	0.0328767	35.0012
COVID non-Hospitalized	12.0658	45.72
COVID non-Hospitalized	0.0328767	35.0012
COVID non-Hospitalized	6.73973	45.72
COVID non-Hospitalized	19.8575	45.72
COVID non-Hospitalized	0.164384	35.0012
COVID non-Hospitalized	0.0986301	35.0012
COVID non-Hospitalized	15.3863	45.72
COVID non-Hospitalized	0.0328767	35.0012
COVID non-Hospitalized	12	45.72
COVID non-Hospitalized	13.7425	45.72
COVID non-Hospitalized	0.0986301	35.0012
COVID non-Hospitalized	6.04932	45.72
COVID non-Hospitalized	0.0328767	35.0012
COVID non-Hospitalized	9.23836	45.72
COVID non-Hospitalized	8.97534	45.72
COVID non-Hospitalized	9.69863	45.72
COVID non-Hospitalized	15.0904	45.72
COVID non-Hospitalized	7.23288	45.72
COVID non-Hospitalized	0.526027	35.0012
COVID non-Hospitalized	0.0328767	35.0012
COVID non-Hospitalized	0.0657534	35.0012
COVID non-Hospitalized	12.2301	45.72
COVID non-Hospitalized	0.0328767	35.0012
COVID non-Hospitalized	0.131507	35.0012
COVID non-Hospitalized	0.29589	35.0012
COVID non-Hospitalized	0.0328767	35.0012
COVID non-Hospitalized	0.0657534	35.0012
COVID non-Hospitalized	0.328767	35.0012
COVID non-Hospitalized	8.1863	45.72
COVID non-Hospitalized	15.5507	45.72
COVID non-Hospitalized	0.19726	35.0012
COVID non-Hospitalized	0.0986301	35.0012
COVID non-Hospitalized	0.164384	35.0012
COVID non-Hospitalized	6.08219	45.72
COVID non-Hospitalized	9.40274	45.72
COVID non-Hospitalized	9.0411	45.72
COVID non-Hospitalized	0.0986301	35.0012
COVID non-Hospitalized	9.66575	45.72
COVID non-Hospitalized	9.56712	45.72
COVID non-Hospitalized	12.789	45.72
COVID non-Hospitalized	9.79726	45.72
COVID non-Hospitalized	0.19726	35.0012
COVID non-Hospitalized	0.131507	35.0012
COVID non-Hospitalized	0.526027	35.0012
COVID non-Hospitalized	0.526027	35.0012
COVID non-Hospitalized	0.0328767	35.0012
COVID non-Hospitalized	9.76438	45.72
COVID non-Hospitalized	0.131507	35.0012
COVID non-Hospitalized	7.6274	45.72
COVID non-Hospitalized	9.23836	45.72
COVID non-Hospitalized	12.1644	45.72
COVID non-Hospitalized	14.9918	45.72
COVID non-Hospitalized	0.657534	35.0012
COVID non-Hospitalized	9.79726	45.72
COVID non-Hospitalized	0.854795	35.0012
COVID non-Hospitalized	13.6767	45.72
COVID non-Hospitalized	8.02192	45.72
COVID non-Hospitalized	9.46849	45.72
COVID non-Hospitalized	0.0657534	35.0012
COVID non-Hospitalized	13.1507	45.72
COVID non-Hospitalized	12.263	45.72
COVID non-Hospitalized	0.0328767	35.0012
COVID non-Hospitalized	0.328767	35.0012
COVID non-Hospitalized	9.13973	45.72
COVID non-Hospitalized	12.263	45.72
COVID non-Hospitalized	4.63562	45.72
COVID non-Hospitalized	9.30411	45.72
COVID non-Hospitalized	13.2822	45.72
COVID non-Hospitalized	7.29863	45.72
COVID non-Hospitalized	9.66575	45.72
COVID non-Hospitalized	9.23836	45.72
COVID non-Hospitalized	7.59452	45.72
COVID non-Hospitalized	10.3233	45.72
COVID non-Hospitalized	12.1973	45.72
COVID non-Hospitalized	10.4877	45.72
COVID non-Hospitalized	13.2493	45.72
COVID non-Hospitalized	13.2164	45.72
COVID non-Hospitalized	10.3562	45.72
COVID non-Hospitalized	0.164384	35.0012
COVID non-Hospitalized	9.63288	45.72
COVID non-Hospitalized	10.389	45.72
COVID non-Hospitalized	12.2959	45.72
COVID non-Hospitalized	10.3233	45.72
COVID non-Hospitalized	9.69863	45.72
COVID non-Hospitalized	12.1644	45.72
COVID non-Hospitalized	12.4932	45.72
COVID non-Hospitalized	8.64658	45.72
COVID non-Hospitalized	6.6411	45.72
COVID non-Hospitalized	9.33699	45.72
COVID non-Hospitalized	0.131507	35.0012
COVID non-Hospitalized	6.18082	45.72
COVID non-Hospitalized	9.33699	45.72
COVID non-Hospitalized	9.00822	45.72
COVID non-Hospitalized	7.03562	45.72
COVID non-Hospitalized	12.2301	45.72
COVID non-Hospitalized	4.10959	45.72
COVID non-Hospitalized	10.3233	45.72
COVID non-Hospitalized	8.58082	45.72
COVID non-Hospitalized	0.0657534	35.0012
COVID non-Hospitalized	8.71233	45.72
COVID non-Hospitalized	9.0411	45.72
COVID non-Hospitalized	7.82466	45.72
COVID non-Hospitalized	6.2137	45.72
COVID non-Hospitalized	0.0657534	35.0012
COVID non-Hospitalized	0.0986301	35.0012
COVID non-Hospitalized	6.57534	45.72
COVID non-Hospitalized	7.82466	45.72
COVID non-Hospitalized	0.131507	35.0012
COVID non-Hospitalized	0.657534	35.0012
COVID non-Hospitalized	9.10685	45.72
COVID non-Hospitalized	0.0328767	35.0012
COVID non-Hospitalized	5.32603	45.72
COVID non-Hospitalized	9.0411	45.72
COVID non-Hospitalized	6.93699	45.72
COVID non-Hospitalized	6.67397	45.72
COVID non-Hospitalized	0.230137	35.0012
COVID non-Hospitalized	0.493151	35.0012
COVID non-Hospitalized	0.19726	35.0012
COVID non-Hospitalized	0.427397	35.0012
COVID non-Hospitalized	0.131507	35.0012
COVID non-Hospitalized	0.0328767	35.0012
COVID non-Hospitalized	0.0657534	35.0012
COVID non-Hospitalized	0.19726	35.0012
COVID non-Hospitalized	0.164384	35.0012
COVID non-Hospitalized	0.0328767	35.0012
COVID non-Hospitalized	0.0657534	35.0012
COVID non-Hospitalized	0.0328767	35.0012
COVID non-Hospitalized	0.0657534	35.0012
COVID non-Hospitalized	0.0986301	35.0012
COVID non-Hospitalized	0.558904	35.0012
COVID non-Hospitalized	0.0328767	35.0012
COVID non-Hospitalized	0.0657534	35.0012
COVID non-Hospitalized	6.60822	45.72
COVID non-Hospitalized	0.164384	35.0012
COVID non-Hospitalized	0.657534	35.0012
COVID non-Hospitalized	0.756164	35.0012
COVID non-Hospitalized	0.986301	35.0012
COVID non-Hospitalized	6.60822	45.72
COVID non-Hospitalized	0.19726	35.0012
COVID non-Hospitalized	0.460274	35.0012
COVID non-Hospitalized	12.0329	45.6997
COVID non-Hospitalized	0.0657534	35.0012
COVID non-Hospitalized	6.24658	45.6997
COVID non-Hospitalized	0.0657534	35.0012
COVID non-Hospitalized	6.04932	45.6006
COVID non-Hospitalized	9.27123	45.6006
COVID non-Hospitalized	0.164384	35.0012
COVID non-Hospitalized	0.690411	35.0012
COVID non-Hospitalized	0.0986301	35.0012
COVID non-Hospitalized	0.0657534	35.0012
COVID non-Hospitalized	0.493151	35.0012
COVID non-Hospitalized	13.2493	45.499
COVID non-Hospitalized	12.0658	45.499
COVID non-Hospitalized	15.6493	45.499
COVID non-Hospitalized	9.76438	45.499
COVID non-Hospitalized	0.0328767	35.0012
COVID non-Hospitalized	0.0657534	35.0012
COVID non-Hospitalized	0.0986301	35.0012
COVID non-Hospitalized	0.0657534	35.0012
COVID non-Hospitalized	0.131507	35.0012
COVID non-Hospitalized	0.131507	35.0012
COVID non-Hospitalized	0.0657534	35.0012
COVID non-Hospitalized	0.0657534	35.0012
COVID non-Hospitalized	0.591781	35.0012
COVID non-Hospitalized	0.0328767	35.0012
COVID non-Hospitalized	0.0328767	35.0012
COVID non-Hospitalized	0.0657534	35.0012
COVID non-Hospitalized	0.19726	35.0012
COVID non-Hospitalized	0.328767	35.0012
COVID non-Hospitalized	0.0328767	35.0012
COVID non-Hospitalized	0.0657534	35.0012
COVID non-Hospitalized	0.986301	35.0012
COVID non-Hospitalized	0.526027	35.0012
COVID non-Hospitalized	0.361644	35.0012
COVID non-Hospitalized	0.19726	35.0012
COVID non-Hospitalized	0.0657534	35.0012
COVID non-Hospitalized	0.230137	35.0012
COVID non-Hospitalized	0.0328767	35.0012
COVID non-Hospitalized	0.0657534	35.0012
COVID non-Hospitalized	0.0657534	35.0012
COVID non-Hospitalized	0.0328767	35.0012
COVID non-Hospitalized	9.07397	45.499
COVID non-Hospitalized	10.0932	45.499
COVID non-Hospitalized	10.389	45.499
COVID non-Hospitalized	11.4411	45.499
COVID non-Hospitalized	0.263014	35.052
COVID non-Hospitalized	0.986301	35.052
COVID non-Hospitalized	0.854795	35.052
COVID non-Hospitalized	0.131507	35.052
COVID non-Hospitalized	12.1644	45.499
COVID non-Hospitalized	0.164384	35.179
COVID non-Hospitalized	0.0328767	35.1993
COVID non-Hospitalized	8.74521	45.499
COVID non-Hospitalized	0.164384	35.2501
COVID non-Hospitalized	0.0986301	35.306
COVID non-Hospitalized	12.0658	45.499
COVID non-Hospitalized	0.131507	35.306
COVID non-Hospitalized	0.230137	35.3492
COVID non-Hospitalized	0.821918	35.499
COVID non-Hospitalized	11.4082	45.499
COVID non-Hospitalized	0.0328767	35.499
COVID non-Hospitalized	0.131507	35.499
COVID non-Hospitalized	0.19726	35.499
COVID non-Hospitalized	0.0657534	35.499
COVID non-Hospitalized	0.0657534	35.499
COVID non-Hospitalized	0.0986301	35.499
COVID non-Hospitalized	0.0328767	35.499
COVID non-Hospitalized	9.6	45.499
COVID non-Hospitalized	7.33151	45.499
COVID non-Hospitalized	6.2137	45.466
COVID non-Hospitalized	6.93699	45.466
COVID non-Hospitalized	0.0657534	35.499
COVID non-Hospitalized	0.0986301	35.499
COVID non-Hospitalized	0.19726	35.499
COVID non-Hospitalized	0.19726	35.499
COVID non-Hospitalized	0.230137	35.499
COVID non-Hospitalized	0.230137	35.499
COVID non-Hospitalized	0.0657534	35.499
COVID non-Hospitalized	9.00822	45.339
COVID non-Hospitalized	0.0328767	35.499
COVID non-Hospitalized	7.16712	45.3009
COVID non-Hospitalized	0.0328767	35.499
COVID non-Hospitalized	0.920548	35.499
COVID non-Hospitalized	0.0657534	35.499
COVID non-Hospitalized	6.18082	45.212
COVID non-Hospitalized	16.7342	45.212
COVID non-Hospitalized	13.8082	45.212
COVID non-Hospitalized	12.1315	45.212
COVID non-Hospitalized	7.52877	45.212
COVID non-Hospitalized	0.0328767	35.499
COVID non-Hospitalized	12.6575	45.1993
COVID non-Hospitalized	9.63288	45.1993
COVID non-Hospitalized	6.14795	45.085
COVID non-Hospitalized	15.0575	45.085
COVID non-Hospitalized	12.7233	45.085
COVID non-Hospitalized	0.131507	35.499
COVID non-Hospitalized	22.4877	45.085
COVID non-Hospitalized	0.361644	35.499
COVID non-Hospitalized	8.97534	45.085
COVID non-Hospitalized	0.0328767	35.499
COVID non-Hospitalized	0.0328767	35.499
COVID non-Hospitalized	9.13973	45.085
COVID non-Hospitalized	0.131507	35.499
COVID non-Hospitalized	0.0657534	35.499
COVID non-Hospitalized	0.0986301	35.499
COVID non-Hospitalized	0.0986301	35.499
COVID non-Hospitalized	12.0986	45.085
COVID non-Hospitalized	0.657534	35.499
COVID non-Hospitalized	0.591781	35.499
COVID non-Hospitalized	9.33699	45.085
COVID non-Hospitalized	18.0164	45.085
COVID non-Hospitalized	12.0329	45.085
COVID non-Hospitalized	18.1808	45.085
COVID non-Hospitalized	6.14795	45.085
COVID non-Hospitalized	8.31781	45.085
COVID non-Hospitalized	0.0328767	35.499
COVID non-Hospitalized	6.24658	45.085
COVID non-Hospitalized	16.537	45.085
COVID non-Hospitalized	9.07397	45.085
COVID non-Hospitalized	9.89589	45.085
COVID non-Hospitalized	12.2301	45.085
COVID non-Hospitalized	0.0328767	35.499
COVID non-Hospitalized	12.0986	45.085
COVID non-Hospitalized	8.97534	45.085
COVID non-Hospitalized	0.0657534	35.499
COVID non-Hospitalized	0.361644	35.499
COVID non-Hospitalized	0.526027	35.499
COVID non-Hospitalized	0.394521	35.499
COVID non-Hospitalized	0.0328767	35.499
COVID non-Hospitalized	0.0328767	35.499
COVID non-Hospitalized	0.0328767	35.499
COVID non-Hospitalized	13.5123	45.0012
COVID non-Hospitalized	0.0328767	35.499
COVID non-Hospitalized	9.43562	45.0012
COVID non-Hospitalized	9.20548	45.0012
COVID non-Hospitalized	0.131507	35.499
COVID non-Hospitalized	0.0328767	35.499
COVID non-Hospitalized	6.6411	45.0012
COVID non-Hospitalized	7.72603	45.0012
COVID non-Hospitalized	0.29589	35.499
COVID non-Hospitalized	9.27123	45.0012
COVID non-Hospitalized	6.41096	45.0012
COVID non-Hospitalized	15.0575	45.0012
COVID non-Hospitalized	17.2274	45.0012
COVID non-Hospitalized	18.6082	45.0012
COVID non-Hospitalized	22.7836	45.0012
COVID non-Hospitalized	12.1315	45.0012
COVID non-Hospitalized	0.0328767	35.499
COVID non-Hospitalized	6.2137	45.0012
COVID non-Hospitalized	0.0328767	35.499
COVID non-Hospitalized	0.0986301	35.499
COVID non-Hospitalized	8.84384	45.0012
COVID non-Hospitalized	0.0986301	35.499
COVID non-Hospitalized	0.328767	35.499
COVID non-Hospitalized	0.0328767	35.499
COVID non-Hospitalized	6.6411	45.0012
COVID non-Hospitalized	0.394521	35.499
COVID non-Hospitalized	0.821918	35.499
COVID non-Hospitalized	0.29589	35.499
COVID non-Hospitalized	0.164384	35.499
COVID non-Hospitalized	0.0986301	35.499
COVID non-Hospitalized	0.493151	35.499
COVID non-Hospitalized	15.189	45.0012
COVID non-Hospitalized	13.5452	45.0012
COVID non-Hospitalized	0.920548	35.499
COVID non-Hospitalized	0.0328767	35.499
COVID non-Hospitalized	0.0657534	35.499
COVID non-Hospitalized	9.1726	45.0012
COVID non-Hospitalized	9.13973	45.0012
COVID non-Hospitalized	10.0274	45.0012
COVID non-Hospitalized	12.0329	45.0012
COVID non-Hospitalized	11.0466	45.0012
COVID non-Hospitalized	0.657534	35.56
COVID non-Hospitalized	6.11507	45.0012
COVID non-Hospitalized	6.01644	45.0012
COVID non-Hospitalized	0.164384	35.56
COVID non-Hospitalized	0.0986301	35.56
COVID non-Hospitalized	0.19726	35.56
COVID non-Hospitalized	0.164384	35.56
COVID non-Hospitalized	0.0986301	35.56
COVID non-Hospitalized	0.0986301	35.56
COVID non-Hospitalized	0.131507	35.56
COVID non-Hospitalized	12.8548	45.0012
COVID non-Hospitalized	0.164384	35.56
COVID non-Hospitalized	5.32603	45.0012
COVID non-Hospitalized	0.230137	35.56
COVID non-Hospitalized	0.690411	35.56
COVID non-Hospitalized	0.624658	35.56
COVID non-Hospitalized	0.460274	35.56
COVID non-Hospitalized	0.920548	35.56
COVID non-Hospitalized	0.986301	35.56
COVID non-Hospitalized	0.131507	35.56
COVID non-Hospitalized	0.19726	35.56
COVID non-Hospitalized	0.460274	35.56
COVID non-Hospitalized	0.131507	35.56
COVID non-Hospitalized	0.263014	35.56
COVID non-Hospitalized	0.131507	35.56
COVID non-Hospitalized	0.526027	35.56
COVID non-Hospitalized	0.19726	35.56
COVID non-Hospitalized	0.427397	35.56
COVID non-Hospitalized	0.887671	35.56
COVID non-Hospitalized	0.164384	35.56
COVID non-Hospitalized	9.63288	45.0012
COVID non-Hospitalized	9.1726	45.0012
COVID non-Hospitalized	0.164384	35.56
COVID non-Hospitalized	0.854795	35.56
COVID non-Hospitalized	0.131507	35.56
COVID non-Hospitalized	0.953425	35.56
COVID non-Hospitalized	0.624658	35.56
COVID non-Hospitalized	9.10685	45.0012
COVID non-Hospitalized	0.427397	35.56
COVID non-Hospitalized	0.0986301	35.56
COVID non-Hospitalized	0.19726	35.56
COVID non-Hospitalized	0.361644	35.56
COVID non-Hospitalized	0.0986301	35.56
COVID non-Hospitalized	18.8712	45.0012
COVID non-Hospitalized	0.164384	35.56
COVID non-Hospitalized	9.10685	45.0012
COVID non-Hospitalized	0.131507	35.56
COVID non-Hospitalized	0.164384	35.56
COVID non-Hospitalized	0.263014	35.56
COVID non-Hospitalized	0.624658	35.56
COVID non-Hospitalized	0.19726	35.56
COVID non-Hospitalized	0.920548	35.56
COVID non-Hospitalized	0.0657534	35.56
COVID non-Hospitalized	0.131507	35.56
COVID non-Hospitalized	12.8548	45.0012
COVID non-Hospitalized	9.0411	45.0012
COVID non-Hospitalized	0.723288	35.56
COVID non-Hospitalized	0.131507	35.56
COVID non-Hospitalized	0.19726	35.56
COVID non-Hospitalized	0.0986301	35.56
COVID non-Hospitalized	9.50137	45.0012
COVID non-Hospitalized	13.0192	45.0012
COVID non-Hospitalized	7.26575	45.0012
COVID non-Hospitalized	0.0986301	35.56
COVID non-Hospitalized	7.6274	45.0012
COVID non-Hospitalized	0.131507	35.56
COVID non-Hospitalized	0.657534	35.56
COVID non-Hospitalized	0.591781	35.56
COVID non-Hospitalized	0.624658	35.56
COVID non-Hospitalized	0.854795	35.56
COVID non-Hospitalized	0.131507	35.56
COVID non-Hospitalized	0.427397	35.56
COVID non-Hospitalized	0.854795	35.56
COVID non-Hospitalized	0.953425	35.56
COVID non-Hospitalized	0.953425	35.56
COVID non-Hospitalized	0.164384	35.56
COVID non-Hospitalized	0.164384	35.56
COVID non-Hospitalized	0.789041	35.56
COVID non-Hospitalized	0.164384	35.56
COVID non-Hospitalized	0.0986301	35.56
COVID non-Hospitalized	0.460274	35.56
[truncated: 71,432 more rows]

## Sheet: Fig 2A
Cohort	age_months_weight	Weight (g)
Pandemic	0	284.062
Pandemic	2	311.845
Pandemic	0	326.02
Pandemic	0	348.983
Pandemic	0	396.893
Pandemic	0	463.231
Pandemic	0	477.973
Pandemic	0	482.603
Pandemic	0	485.749
Pandemic	0	498.952
Pandemic	0	503.355
Pandemic	0	503.393
Pandemic	0	510.291
Pandemic	0	536.156
Pandemic	0	539.184
Pandemic	0	550.636
Pandemic	0	559.903
Pandemic	0	563.411
Pandemic	0	568.745
Pandemic	0	572.344
Pandemic	0	573.475
Pandemic	0	575.956
Pandemic	0	579.993
Pandemic	0	587.508
Pandemic	0	591.849
Pandemic	0	592.47
Pandemic	0	600.653
Pandemic	0	609.987
Pandemic	0	619.402
Pandemic	0	619.986
Pandemic	0	623.312
Pandemic	0	624.345
Pandemic	0	634.112
Pandemic	0	637.492
Pandemic	0	640.003
Pandemic	0	648.637
Pandemic	1	652.341
Pandemic	0	658.134
Pandemic	0	660.038
Pandemic	0	660.134
Pandemic	0	662.192
Pandemic	0	664.371
Pandemic	0	665.778
Pandemic	0	666.869
Pandemic	1	667.499
Pandemic	0	670.655
Pandemic	0	675.994
Pandemic	0	677.483
Pandemic	0	679.999
Pandemic	0	693.429
Pandemic	0	695.697
Pandemic	0	708.505
Pandemic	0	709.057
Pandemic	0	710.315
Pandemic	0	716.676
Pandemic	1	717.026
Pandemic	0	735.651
Pandemic	0	739.422
Pandemic	1	739.659
Pandemic	0	749.637
Pandemic	0	750.579
Pandemic	0	752.046
Pandemic	0	753.743
Pandemic	0	756.446
Pandemic	0	762.496
Pandemic	0	763.488
Pandemic	0	769.672
Pandemic	0	770.026
Pandemic	0	775.377
Pandemic	0	779.417
Pandemic	0	780.329
Pandemic	0	787.125
Pandemic	0	797.982
Pandemic	0	810.402
Pandemic	1	815.606
Pandemic	0	817.391
Pandemic	0	819.868
Pandemic	0	819.992
Pandemic	1	822.495
Pandemic	1	823.466
Pandemic	1	828.968
Pandemic	0	830.588
Pandemic	1	832.531
Pandemic	0	834.078
Pandemic	0	834.397
Pandemic	0	837.817
Pandemic	0	838.829
Pandemic	0	839.057
Pandemic	0	852.931
Pandemic	1	869.352
Pandemic	0	869.374
Pandemic	0	876.585
Pandemic	1	876.652
Pandemic	0	879.367
Pandemic	0	880.82
Pandemic	0	884.47
Pandemic	0	886.773
Pandemic	1	888.247
Pandemic	1	889.901
Pandemic	0	896.012
Pandemic	0	896.979
Pandemic	1	897.244
Pandemic	0	898.23
Pandemic	0	900.097
Pandemic	0	904.671
Pandemic	1	905.011
Pandemic	0	906.712
Pandemic	0	909.655
Pandemic	0	912.304
Pandemic	1	917.024
Pandemic	1	921
Pandemic	0	922.569
Pandemic	1	922.914
Pandemic	1	926.245
Pandemic	0	932.31
Pandemic	0	936.385
Pandemic	0	938.16
Pandemic	0	944.021
Pandemic	0	947.902
Pandemic	0	952.627
Pandemic	1	955.245
Pandemic	1	956.229
Pandemic	0	956.796
Pandemic	0	958.586
Pandemic	1	962.036
Pandemic	0	962.466
Pandemic	1	964.258
Pandemic	0	969.629
Pandemic	0	973.976
Pandemic	0	974.373
Pandemic	0	975.04
Pandemic	0	983.197
Pandemic	1	983.711
Pandemic	0	987.681
Pandemic	1	994.322
Pandemic	0	994.501
Pandemic	1	999.169
Pandemic	1	1001.5
Pandemic	0	1005.01
Pandemic	0	1010.46
Pandemic	1	1011.07
Pandemic	0	1012.9
Pandemic	2	1017.03
Pandemic	0	1025.84
Pandemic	1	1026.31
Pandemic	1	1027.48
Pandemic	0	1029.67
Pandemic	0	1031.34
Pandemic	1	1031.95
Pandemic	0	1033.13
Pandemic	0	1035.02
Pandemic	0	1038.28
Pandemic	0	1039.99
Pandemic	1	1041.05
Pandemic	0	1041.76
Pandemic	0	1044.71
Pandemic	1	1045.15
Pandemic	1	1045.64
Pandemic	1	1047.73
Pandemic	1	1048.32
Pandemic	1	1051.98
Pandemic	0	1054.37
Pandemic	1	1054.99
Pandemic	0	1055.27
Pandemic	0	1055.59
Pandemic	0	1056.53
Pandemic	1	1061.68
Pandemic	0	1062.54
Pandemic	1	1073.79
Pandemic	1	1078.19
Pandemic	0	1079.29
Pandemic	0	1083.73
Pandemic	1	1085.13
Pandemic	1	1087.15
Pandemic	0	1087.35
Pandemic	0	1088.71
Pandemic	1	1089.54
Pandemic	1	1094
Pandemic	1	1108.43
Pandemic	1	1109.83
Pandemic	1	1110.47
Pandemic	0	1116.74
Pandemic	1	1119.1
Pandemic	1	1119.82
Pandemic	0	1120.64
Pandemic	0	1124.2
Pandemic	0	1133.56
Pandemic	0	1135.65
Pandemic	1	1137.77
Pandemic	0	1147.63
Pandemic	0	1148.4
Pandemic	0	1149.33
Pandemic	0	1154.66
Pandemic	1	1155.65
Pandemic	0	1160.9
Pandemic	0	1161.25
Pandemic	1	1165.8
Pandemic	1	1168.15
Pandemic	0	1171.12
Pandemic	0	1173.33
Pandemic	0	1178.74
Pandemic	0	1180.62
Pandemic	0	1184.43
Pandemic	0	1185.91
Pandemic	1	1189.32
Pandemic	1	1190.86
Pandemic	1	1192.31
Pandemic	2	1194.32
Pandemic	0	1195.97
Pandemic	0	1201.72
Pandemic	0	1210.87
Pandemic	1	1213.12
Pandemic	1	1218.65
Pandemic	0	1221.58
Pandemic	1	1223.62
Pandemic	0	1223.76
Pandemic	1	1224.65
Pandemic	2	1224.97
Pandemic	0	1230.92
Pandemic	0	1233.8
Pandemic	2	1237.2
Pandemic	0	1246.76
Pandemic	0	1252.05
Pandemic	0	1254.04
Pandemic	0	1259.72
Pandemic	1	1260.02
Pandemic	1	1264.08
Pandemic	0	1272.83
Pandemic	0	1276.4
Pandemic	2	1281.77
Pandemic	0	1285.3
Pandemic	0	1286.22
Pandemic	1	1287.55
Pandemic	1	1288
Pandemic	1	1288.31
Pandemic	0	1288.44
Pandemic	0	1288.8
Pandemic	2	1293.98
Pandemic	1	1293.99
Pandemic	1	1300
Pandemic	1	1300.57
Pandemic	2	1301.61
Pandemic	1	1304.33
Pandemic	0	1309.24
Pandemic	0	1309.36
Pandemic	1	1311.33
Pandemic	1	1317.13
Pandemic	0	1321.55
Pandemic	0	1322.29
Pandemic	0	1322.79
Pandemic	0	1323.22
Pandemic	0	1326.38
Pandemic	1	1326.78
Pandemic	0	1327.36
Pandemic	0	1328.71
Pandemic	0	1334.66
Pandemic	1	1339.65
Pandemic	1	1339.78
Pandemic	0	1342.9
Pandemic	1	1348.68
Pandemic	1	1354.32
Pandemic	0	1354.98
Pandemic	2	1355.91
Pandemic	0	1360
Pandemic	0	1360.32
Pandemic	0	1364.37
Pandemic	0	1367.33
Pandemic	2	1373.86
Pandemic	0	1374.95
Pandemic	0	1380.62
Pandemic	1	1387.76
Pandemic	0	1389.66
Pandemic	0	1391.05
Pandemic	2	1392.93
Pandemic	1	1394.88
Pandemic	0	1396.23
Pandemic	0	1399.98
Pandemic	1	1404.8
Pandemic	0	1407.65
Pandemic	1	1408.05
Pandemic	1	1410.25
Pandemic	2	1411.49
Pandemic	0	1416.52
Pandemic	0	1417.29
Pandemic	1	1418.22
Pandemic	0	1428.53
Pandemic	1	1428.93
Pandemic	0	1432.92
Pandemic	2	1435.95
Pandemic	1	1443.68
Pandemic	1	1448.73
Pandemic	0	1453.53
Pandemic	0	1454.65
Pandemic	1	1458.65
Pandemic	0	1458.8
Pandemic	1	1459.58
Pandemic	2	1460.58
Pandemic	0	1460.62
Pandemic	1	1463.31
Pandemic	1	1467.14
Pandemic	1	1467.3
Pandemic	0	1468.54
Pandemic	2	1477.34
Pandemic	0	1480.11
Pandemic	0	1480.31
Pandemic	0	1488.18
Pandemic	2	1490.5
Pandemic	1	1491.62
Pandemic	1	1491.95
Pandemic	1	1492.93
Pandemic	1	1493.97
Pandemic	0	1495.31
Pandemic	0	1496.15
Pandemic	0	1499.09
Pandemic	1	1499.48
Pandemic	0	1500.46
Pandemic	0	1506.12
Pandemic	0	1510.65
Pandemic	0	1512.8
Pandemic	1	1513.96
Pandemic	2	1519.32
Pandemic	0	1520.85
Pandemic	0	1525.62
Pandemic	0	1525.82
Pandemic	0	1531.82
Pandemic	2	1533.16
Pandemic	1	1533.41
Pandemic	0	1534.78
Pandemic	2	1537
Pandemic	0	1538.93
Pandemic	0	1539.11
Pandemic	1	1539.32
Pandemic	0	1543.21
Pandemic	2	1543.28
Pandemic	1	1543.68
Pandemic	2	1545
Pandemic	1	1545.13
Pandemic	1	1545.49
Pandemic	0	1547.98
Pandemic	1	1550.46
Pandemic	0	1551.83
Pandemic	1	1552.68
Pandemic	0	1556.81
Pandemic	1	1556.98
Pandemic	1	1558.39
Pandemic	0	1562.5
Pandemic	1	1564.14
Pandemic	2	1564.86
Pandemic	0	1566.28
Pandemic	0	1571.28
Pandemic	0	1572.25
Pandemic	1	1572.58
Pandemic	2	1573.1
Pandemic	0	1574.63
Pandemic	1	1575.04
Pandemic	0	1575.31
Pandemic	1	1578.13
Pandemic	0	1583.14
Pandemic	0	1584.97
Pandemic	1	1585.15
Pandemic	2	1587.63
Pandemic	2	1588.48
Pandemic	0	1590.92
Pandemic	1	1593.6
Pandemic	0	1598.08
Pandemic	1	1599.79
Pandemic	0	1604.3
Pandemic	2	1605.46
Pandemic	1	1605.84
Pandemic	0	1606.23
Pandemic	0	1607.49
Pandemic	1	1612.64
Pandemic	2	1615.64
Pandemic	0	1618.35
Pandemic	1	1621.6
Pandemic	1	1624.82
Pandemic	1	1625.83
Pandemic	0	1630.33
Pandemic	0	1632.83
Pandemic	2	1633.32
Pandemic	0	1637.15
Pandemic	2	1638.34
Pandemic	2	1639.95
Pandemic	1	1640.32
Pandemic	2	1640.56
Pandemic	0	1642.77
Pandemic	0	1644.06
Pandemic	0	1644.06
Pandemic	0	1644.33
Pandemic	1	1645.32
Pandemic	0	1647.85
Pandemic	0	1651.86
Pandemic	0	1652.57
Pandemic	0	1654.11
Pandemic	0	1659.96
Pandemic	1	1661.03
Pandemic	0	1663.91
Pandemic	0	1665.92
Pandemic	0	1668.01
Pandemic	0	1678.05
Pandemic	0	1679.99
Pandemic	0	1682.14
Pandemic	0	1683.75
Pandemic	1	1684.29
Pandemic	0	1689.35
Pandemic	1	1691.06
Pandemic	0	1691.33
Pandemic	1	1691.39
Pandemic	2	1692.17
Pandemic	0	1693.12
Pandemic	0	1694.88
Pandemic	0	1697.45
Pandemic	1	1699.97
Pandemic	0	1700.03
Pandemic	0	1702.8
Pandemic	2	1705.16
Pandemic	0	1707.49
Pandemic	1	1708.25
Pandemic	0	1709.34
Pandemic	1	1710.66
Pandemic	0	1712.64
Pandemic	0	1713.01
Pandemic	0	1714.56
Pandemic	0	1716.05
Pandemic	1	1717.23
Pandemic	2	1720.67
Pandemic	1	1721.54
Pandemic	0	1722.85
Pandemic	0	1723.03
Pandemic	1	1724.81
Pandemic	0	1725.07
Pandemic	1	1726.54
Pandemic	0	1727.28
Pandemic	1	1727.71
Pandemic	2	1727.84
Pandemic	1	1730.1
Pandemic	2	1731.31
Pandemic	0	1732.16
Pandemic	2	1735.53
Pandemic	1	1738.79
Pandemic	2	1741.99
Pandemic	0	1743.52
Pandemic	0	1744.26
Pandemic	1	1744.63
Pandemic	0	1749.36
Pandemic	2	1750.48
Pandemic	0	1751.24
Pandemic	0	1755.36
Pandemic	2	1756.04
Pandemic	0	1756.42
Pandemic	0	1757.08
Pandemic	0	1758.12
Pandemic	0	1759.63
Pandemic	0	1761.02
Pandemic	0	1763.39
Pandemic	0	1764.92
Pandemic	0	1765.97
Pandemic	0	1766.44
Pandemic	1	1766.55
Pandemic	0	1768.31
Pandemic	0	1769.96
Pandemic	1	1777.16
Pandemic	0	1779.06
Pandemic	1	1780.24
Pandemic	0	1781.06
Pandemic	1	1781.38
Pandemic	1	1783.17
Pandemic	1	1783.76
Pandemic	0	1784.6
Pandemic	2	1784.87
Pandemic	0	1786
Pandemic	0	1786.96
Pandemic	2	1788.07
Pandemic	0	1789.99
Pandemic	0	1795.39
Pandemic	0	1797.2
Pandemic	0	1797.48
Pandemic	1	1800.49
Pandemic	2	1800.73
Pandemic	1	1803.21
Pandemic	1	1803.81
Pandemic	0	1803.95
Pandemic	0	1804.48
Pandemic	3	1807.49
Pandemic	0	1810.12
Pandemic	0	1811.55
Pandemic	1	1813.56
Pandemic	0	1813.66
Pandemic	1	1814.48
Pandemic	2	1815.01
Pandemic	0	1816.96
Pandemic	0	1822.36
Pandemic	2	1824.8
Pandemic	1	1824.96
Pandemic	0	1825.24
Pandemic	1	1827.17
Pandemic	0	1827.46
Pandemic	0	1830.02
Pandemic	1	1831.28
Pandemic	0	1831.89
Pandemic	1	1833.89
Pandemic	1	1836.67
Pandemic	0	1838.58
Pandemic	0	1841.83
Pandemic	0	1843.61
Pandemic	0	1843.87
Pandemic	0	1844.42
Pandemic	1	1844.96
Pandemic	0	1845.27
Pandemic	1	1846.69
Pandemic	0	1847.67
Pandemic	0	1847.77
Pandemic	0	1850.09
Pandemic	0	1850.7
Pandemic	2	1851.64
Pandemic	0	1851.96
Pandemic	0	1852.29
Pandemic	0	1852.5
Pandemic	0	1853.24
Pandemic	0	1853.35
Pandemic	0	1854.04
Pandemic	1	1854.31
Pandemic	0	1855.58
Pandemic	0	1861.67
Pandemic	3	1862.09
Pandemic	0	1862.46
Pandemic	0	1863.23
Pandemic	1	1863.97
Pandemic	0	1864.28
Pandemic	1	1864.81
Pandemic	1	1866.11
Pandemic	0	1867.72
Pandemic	2	1869.68
Pandemic	2	1869.87
Pandemic	1	1869.98
Pandemic	0	1871.71
Pandemic	0	1873
Pandemic	0	1873.39
Pandemic	0	1875.68
Pandemic	2	1875.96
Pandemic	1	1876.39
Pandemic	0	1876.93
Pandemic	0	1878.1
Pandemic	0	1878.31
Pandemic	0	1880
Pandemic	0	1880.14
Pandemic	0	1880.32
Pandemic	0	1881.2
Pandemic	1	1881.47
Pandemic	0	1882.44
Pandemic	1	1884.96
Pandemic	2	1886.06
Pandemic	0	1889.41
Pandemic	0	1890.63
Pandemic	0	1891.03
Pandemic	0	1892.13
Pandemic	1	1892.94
Pandemic	3	1893.19
Pandemic	1	1893.83
Pandemic	0	1894.92
Pandemic	1	1895.53
Pandemic	0	1895.83
Pandemic	0	1896.34
Pandemic	2	1897.97
Pandemic	0	1898.78
Pandemic	1	1899.78
Pandemic	0	1900.1
Pandemic	0	1900.55
Pandemic	0	1900.74
Pandemic	1	1902.15
Pandemic	0	1903.2
Pandemic	0	1904.66
Pandemic	0	1906.67
Pandemic	1	1907
Pandemic	0	1907.85
Pandemic	1	1914.73
Pandemic	0	1915.4
Pandemic	0	1915.54
Pandemic	0	1915.99
Pandemic	1	1918.32
Pandemic	0	1918.49
Pandemic	0	1919.15
Pandemic	0	1919.24
Pandemic	0	1920.11
Pandemic	0	1921.67
Pandemic	0	1922.99
Pandemic	0	1924.08
Pandemic	0	1926.3
Pandemic	0	1926.51
Pandemic	0	1928.09
Pandemic	1	1930.73
Pandemic	0	1931.06
Pandemic	1	1932.39
Pandemic	1	1932.45
Pandemic	0	1934.4
Pandemic	2	1934.63
Pandemic	0	1934.82
Pandemic	0	1935.69
Pandemic	1	1935.83
Pandemic	0	1937.04
Pandemic	2	1937.55
Pandemic	0	1937.78
Pandemic	0	1938.57
Pandemic	0	1938.75
Pandemic	0	1939.11
Pandemic	0	1939.46
Pandemic	0	1939.96
Pandemic	1	1940.62
Pandemic	2	1940.84
Pandemic	3	1940.99
Pandemic	1	1942.02
Pandemic	0	1942.51
Pandemic	1	1942.59
Pandemic	0	1943.2
Pandemic	0	1944.19
Pandemic	1	1944.38
Pandemic	0	1944.97
Pandemic	0	1945.5
Pandemic	1	1946.03
Pandemic	0	1946.85
Pandemic	1	1951.22
Pandemic	2	1954.42
Pandemic	1	1955.27
Pandemic	0	1955.3
Pandemic	0	1956.32
Pandemic	0	1956.97
Pandemic	0	1957.82
Pandemic	2	1958.11
Pandemic	0	1958.57
Pandemic	1	1958.61
Pandemic	2	1961.87
Pandemic	1	1962.29
Pandemic	0	1962.5
Pandemic	0	1966.96
Pandemic	0	1967.32
Pandemic	2	1968.96
Pandemic	1	1970.01
Pandemic	1	1970.95
Pandemic	1	1971.87
Pandemic	2	1972.38
Pandemic	0	1973.78
Pandemic	0	1975.17
Pandemic	1	1977.77
Pandemic	0	1978.12
Pandemic	0	1979.82
Pandemic	0	1980.04
Pandemic	0	1980.1
Pandemic	3	1981.19
Pandemic	2	1982.28
Pandemic	3	1983.11
Pandemic	0	1983.28
Pandemic	0	1983.94
Pandemic	0	1985.32
Pandemic	1	1986.8
Pandemic	0	1987.5
Pandemic	2	1988.34
Pandemic	0	1989.99
Pandemic	1	1990.02
Pandemic	0	1992.29
Pandemic	0	1992.42
Pandemic	0	1992.51
Pandemic	0	1992.65
Pandemic	0	1993.17
Pandemic	0	1994.12
Pandemic	0	1994.67
Pandemic	0	1994.96
Pandemic	0	1995.66
Pandemic	0	1996.07
Pandemic	0	1999.37
Pandemic	1	2000.06
Pandemic	0	2000.14
Pandemic	1	2000.63
Pandemic	0	2000.82
Pandemic	0	2002.2
Pandemic	0	2002.49
Pandemic	0	2002.61
Pandemic	0	2003.33
Pandemic	2	2003.45
Pandemic	0	2003.48
Pandemic	1	2004.83
Pandemic	0	2005.32
Pandemic	1	2005.45
Pandemic	0	2006.15
Pandemic	1	2006.58
Pandemic	0	2007.59
Pandemic	0	2008
Pandemic	0	2008.68
Pandemic	0	2008.85
Pandemic	1	2009.38
Pandemic	0	2009.98
Pandemic	0	2014.42
Pandemic	0	2017.57
Pandemic	2	2019.58
Pandemic	0	2021.18
Pandemic	0	2022.57
Pandemic	0	2022.79
Pandemic	0	2022.88
Pandemic	0	2023.4
Pandemic	1	2024.48
Pandemic	0	2024.94
Pandemic	0	2025.27
Pandemic	1	2025.93
Pandemic	2	2027.09
Pandemic	0	2028.12
Pandemic	0	2029.42
Pandemic	1	2029.64
Pandemic	2	2029.83
Pandemic	0	2030.9
Pandemic	0	2031.6
Pandemic	0	2032.38
Pandemic	1	2032.94
Pandemic	0	2034.13
Pandemic	0	2034.93
Pandemic	1	2035.33
Pandemic	0	2036.28
Pandemic	1	2036.32
Pandemic	0	2037.36
Pandemic	1	2038.69
Pandemic	0	2038.85
Pandemic	1	2040.03
Pandemic	0	2040.05
Pandemic	0	2040.32
Pandemic	1	2041.17
Pandemic	1	2041.84
Pandemic	0	2043.24
Pandemic	0	2043.45
Pandemic	0	2044
Pandemic	0	2044.45
Pandemic	0	2044.78
Pandemic	0	2044.99
Pandemic	1	2047.07
Pandemic	0	2047.12
Pandemic	0	2047.65
Pandemic	2	2048.85
Pandemic	3	2049.1
Pandemic	0	2049.71
Pandemic	1	2049.99
Pandemic	0	2051.51
Pandemic	0	2051.53
Pandemic	0	2051.78
Pandemic	0	2051.94
Pandemic	1	2052.41
Pandemic	0	2055.02
Pandemic	0	2055.06
Pandemic	0	2056.35
Pandemic	0	2059.69
Pandemic	0	2060.9
Pandemic	0	2061.46
Pandemic	0	2061.79
Pandemic	0	2063.93
Pandemic	0	2064.74
Pandemic	0	2064.98
Pandemic	0	2065.04
Pandemic	0	2067.06
Pandemic	0	2067.63
Pandemic	1	2068.12
Pandemic	0	2068.66
Pandemic	1	2068.74
Pandemic	3	2069.98
Pandemic	0	2070.69
Pandemic	0	2071.87
Pandemic	0	2072.11
Pandemic	0	2072.44
Pandemic	1	2073.34
Pandemic	0	2073.34
Pandemic	0	2073.48
Pandemic	2	2075.21
Pandemic	2	2075.32
Pandemic	0	2075.59
Pandemic	2	2075.63
Pandemic	0	2076.64
Pandemic	2	2078.63
Pandemic	0	2080
Pandemic	0	2080.33
Pandemic	1	2080.83
Pandemic	0	2081.88
Pandemic	0	2082.27
Pandemic	0	2082.89
Pandemic	0	2083.61
Pandemic	0	2083.85
Pandemic	0	2083.93
Pandemic	1	2083.97
Pandemic	0	2084.26
Pandemic	0	2085.45
Pandemic	0	2086.94
Pandemic	0	2087.05
Pandemic	0	2089.36
Pandemic	2	2089.8
Pandemic	0	2090.06
Pandemic	0	2090.45
Pandemic	0	2091.2
Pandemic	1	2091.46
Pandemic	0	2092.78
Pandemic	0	2093.8
Pandemic	0	2095.09
Pandemic	0	2097.3
Pandemic	0	2097.33
Pandemic	0	2097.81
Pandemic	0	2098.03
Pandemic	3	2098.59
Pandemic	1	2098.94
Pandemic	2	2099.32
Pandemic	1	2099.85
Pandemic	0	2100.17
Pandemic	1	2100.33
Pandemic	0	2100.63
Pandemic	0	2101.17
Pandemic	0	2101.51
Pandemic	2	2101.52
Pandemic	0	2102.83
Pandemic	0	2103.33
Pandemic	0	2104.67
Pandemic	0	2105.11
Pandemic	1	2105.65
Pandemic	1	2107.4
Pandemic	0	2108.98
Pandemic	0	2109
Pandemic	0	2109.77
Pandemic	0	2110.53
Pandemic	0	2110.96
Pandemic	0	2111.03
Pandemic	1	2111.11
Pandemic	1	2111.58
Pandemic	0	2111.66
Pandemic	2	2111.67
Pandemic	0	2112.7
Pandemic	0	2113.86
Pandemic	0	2113.93
Pandemic	3	2113.94
Pandemic	0	2114.56
Pandemic	0	2114.57
Pandemic	1	2114.99
Pandemic	0	2115.42
Pandemic	0	2115.64
Pandemic	0	2116.52
Pandemic	0	2116.76
Pandemic	0	2117.31
Pandemic	0	2117.65
Pandemic	0	2117.79
Pandemic	0	2118.15
Pandemic	0	2118.21
Pandemic	0	2118.37
Pandemic	0	2118.38
Pandemic	1	2118.99
Pandemic	1	2121.72
Pandemic	0	2122.16
Pandemic	0	2122.64
Pandemic	0	2122.75
Pandemic	1	2123.66
Pandemic	0	2123.7
Pandemic	0	2124.34
Pandemic	1	2124.7
Pandemic	0	2125.53
Pandemic	0	2125.65
Pandemic	1	2125.86
Pandemic	1	2125.97
Pandemic	0	2126.35
Pandemic	0	2127.54
Pandemic	1	2130.14
Pandemic	0	2131.13
Pandemic	0	2132.24
Pandemic	0	2132.65
Pandemic	0	2132.66
Pandemic	0	2133.3
Pandemic	0	2133.87
Pandemic	0	2134.84
Pandemic	0	2135.55
Pandemic	0	2136.14
Pandemic	1	2138.03
Pandemic	0	2138.24
Pandemic	1	2138.57
Pandemic	2	2140.39
Pandemic	2	2140.68
Pandemic	0	2141.45
Pandemic	0	2142.91
Pandemic	0	2144.7
Pandemic	0	2147.15
Pandemic	0	2147.68
Pandemic	0	2148.97
Pandemic	0	2149.53
Pandemic	2	2150.03
Pandemic	0	2150.59
Pandemic	0	2150.78
Pandemic	2	2152.88
Pandemic	1	2153.34
Pandemic	0	2153.38
Pandemic	3	2153.77
Pandemic	0	2154.38
Pandemic	0	2155.57
Pandemic	2	2156.33
Pandemic	0	2156.4
Pandemic	0	2156.92
Pandemic	1	2157.84
Pandemic	0	2158.34
Pandemic	1	2159.13
Pandemic	0	2160.7
Pandemic	0	2161.23
Pandemic	0	2162.22
Pandemic	0	2162.96
Pandemic	0	2164.72
Pandemic	3	2169.22
Pandemic	0	2169.97
Pandemic	0	2170.49
Pandemic	0	2171.36
Pandemic	2	2172.42
Pandemic	0	2173.56
Pandemic	1	2174.3
Pandemic	0	2174.5
Pandemic	2	2175.15
Pandemic	0	2175.45
Pandemic	2	2175.62
Pandemic	1	2175.83
Pandemic	0	2176.37
Pandemic	0	2176.39
Pandemic	1	2176.39
Pandemic	1	2176.47
Pandemic	0	2177.24
Pandemic	1	2177.31
Pandemic	0	2177.62
Pandemic	1	2177.95
Pandemic	1	2179.14
Pandemic	0	2179.68
Pandemic	0	2181.39
Pandemic	0	2181.5
Pandemic	1	2181.5
Pandemic	1	2181.78
Pandemic	0	2182.54
Pandemic	1	2182.91
Pandemic	1	2182.92
Pandemic	0	2183.31
Pandemic	0	2183.73
Pandemic	0	2184.33
Pandemic	3	2185.87
Pandemic	0	2185.88
Pandemic	0	2186.39
Pandemic	1	2187.48
Pandemic	3	2188.05
Pandemic	0	2188.13
Pandemic	1	2190.04
Pandemic	0	2190.69
Pandemic	0	2191.89
Pandemic	2	2192.72
Pandemic	0	2193.97
Pandemic	1	2194.25
Pandemic	0	2195.95
Pandemic	0	2196.01
Pandemic	0	2196.01
Pandemic	0	2197.44
Pandemic	1	2198
Pandemic	0	2198.17
Pandemic	0	2198.22
Pandemic	1	2199.92
Pandemic	0	2200.96
Pandemic	1	2201.4
Pandemic	2	2201.51
Pandemic	1	2201.54
Pandemic	2	2201.55
Pandemic	0	2202.47
Pandemic	0	2202.64
Pandemic	3	2202.81
Pandemic	0	2204.52
Pandemic	0	2204.55
Pandemic	2	2205.1
Pandemic	0	2206.62
Pandemic	2	2206.73
Pandemic	0	2209.89
Pandemic	0	2210.27
Pandemic	0	2210.36
Pandemic	1	2211.26
Pandemic	2	2212.4
Pandemic	1	2212.49
Pandemic	0	2212.92
Pandemic	2	2213.74
Pandemic	0	2214.9
Pandemic	0	2215.35
Pandemic	3	2216.45
Pandemic	0	2218.61
Pandemic	0	2220.24
Pandemic	0	2220.62
Pandemic	0	2222.04
Pandemic	1	2222.14
Pandemic	0	2223.45
Pandemic	0	2223.85
Pandemic	2	2224.18
Pandemic	2	2224.81
Pandemic	0	2224.97
Pandemic	1	2225.37
Pandemic	1	2225.44
Pandemic	0	2225.61
Pandemic	0	2226.38
Pandemic	0	2227.34
Pandemic	0	2227.35
Pandemic	0	2227.79
Pandemic	0	2228.27
Pandemic	0	2228.72
Pandemic	0	2228.95
Pandemic	0	2229.03
Pandemic	0	2232.22
Pandemic	2	2232.55
Pandemic	0	2232.62
Pandemic	0	2234.87
Pandemic	0	2235.45
Pandemic	0	2235.87
Pandemic	0	2236.21
Pandemic	1	2236.78
Pandemic	0	2238.88
Pandemic	1	2239.25
Pandemic	0	2240.39
Pandemic	0	2240.46
Pandemic	0	2240.94
Pandemic	0	2241.55
Pandemic	0	2241.67
Pandemic	0	2242.73
Pandemic	0	2244.12
Pandemic	0	2244.38
Pandemic	0	2244.94
Pandemic	0	2245.11
Pandemic	0	2245.13
Pandemic	0	2246.93
Pandemic	0	2247.38
Pandemic	1	2247.79
Pandemic	0	2248.31
Pandemic	0	2248.51
Pandemic	0	2248.57
Pandemic	2	2248.97
Pandemic	0	2249.82
Pandemic	1	2250.1
Pandemic	0	2250.53
Pandemic	1	2250.95
Pandemic	2	2251.97
Pandemic	0	2252.41
Pandemic	1	2253.79
Pandemic	1	2253.79
Pandemic	1	2253.79
Pandemic	1	2254.01
Pandemic	0	2255.24
Pandemic	0	2255.65
Pandemic	0	2256.06
Pandemic	1	2256.38
Pandemic	0	2257.64
Pandemic	0	2257.69
Pandemic	1	2258.1
Pandemic	0	2258.39
Pandemic	0	2258.75
Pandemic	0	2258.96
Pandemic	0	2259.34
Pandemic	0	2259.83
Pandemic	0	2260.07
Pandemic	1	2260.17
Pandemic	0	2260.19
Pandemic	0	2260.97
Pandemic	0	2261.02
Pandemic	0	2261.6
Pandemic	0	2261.8
Pandemic	0	2262.58
Pandemic	1	2262.83
Pandemic	0	2263.24
Pandemic	0	2263.27
Pandemic	0	2263.71
Pandemic	1	2264.91
Pandemic	0	2265.89
Pandemic	0	2266.19
Pandemic	0	2266.43
Pandemic	0	2267.16
Pandemic	0	2267.8
Pandemic	1	2267.84
Pandemic	1	2267.96
Pandemic	0	2268.1
Pandemic	0	2268.53
Pandemic	0	2268.7
Pandemic	0	2270.04
Pandemic	0	2270.59
Pandemic	1	2271
Pandemic	0	2271.69
Pandemic	2	2271.83
Pandemic	0	2271.9
Pandemic	0	2271.93
Pandemic	2	2273.31
Pandemic	0	2274.62
Pandemic	3	2275.09
Pandemic	0	2275.53
Pandemic	0	2277.16
Pandemic	0	2277.76
Pandemic	1	2277.99
Pandemic	0	2278
Pandemic	2	2278.26
Pandemic	0	2279.21
Pandemic	0	2279.21
Pandemic	0	2279.23
Pandemic	2	2280.66
Pandemic	0	2281.34
Pandemic	0	2282.02
Pandemic	0	2282.17
Pandemic	0	2282.21
Pandemic	0	2282.26
Pandemic	0	2282.3
Pandemic	0	2282.42
Pandemic	1	2282.88
Pandemic	0	2282.93
Pandemic	0	2284.83
Pandemic	1	2285.34
Pandemic	0	2286.23
Pandemic	0	2286.55
Pandemic	0	2287.01
Pandemic	0	2288.28
Pandemic	1	2289.22
Pandemic	0	2289.28
Pandemic	0	2289.84
Pandemic	0	2290.33
Pandemic	0	2290.57
Pandemic	0	2290.72
Pandemic	0	2290.96
Pandemic	1	2291.82
Pandemic	1	2292.65
Pandemic	0	2292.84
Pandemic	0	2292.91
Pandemic	0	2293.38
Pandemic	3	2294.14
Pandemic	0	2295.23
Pandemic	0	2295.62
Pandemic	0	2295.79
Pandemic	0	2296.22
Pandemic	0	2296.51
Pandemic	1	2296.97
Pandemic	1	2297.22
Pandemic	3	2298.15
Pandemic	0	2299.78
Pandemic	0	2299.93
Pandemic	1	2299.98
Pandemic	0	2300
Pandemic	1	2300.15
Pandemic	0	2300.69
Pandemic	0	2300.99
Pandemic	0	2301.33
Pandemic	0	2304.59
Pandemic	0	2306.25
Pandemic	0	2307.81
Pandemic	2	2308.04
Pandemic	0	2308.22
Pandemic	0	2308.36
Pandemic	2	2309.4
Pandemic	0	2310.24
Pandemic	0	2310.81
Pandemic	0	2311.02
Pandemic	0	2311.15
Pandemic	0	2311.39
Pandemic	0	2312.84
Pandemic	0	2312.98
Pandemic	0	2313.77
Pandemic	0	2313.94
Pandemic	0	2313.96
Pandemic	0	2314.03
Pandemic	0	2314.95
Pandemic	0	2314.97
Pandemic	0	2315.06
Pandemic	0	2315.26
Pandemic	0	2316.8
Pandemic	0	2317.43
Pandemic	0	2317.46
Pandemic	2	2318.8
Pandemic	0	2319.33
Pandemic	0	2319.95
Pandemic	0	2319.95
Pandemic	0	2319.98
Pandemic	2	2320.12
Pandemic	1	2320.74
Pandemic	0	2321.3
Pandemic	0	2321.38
Pandemic	0	2321.45
Pandemic	0	2321.49
Pandemic	1	2321.64
Pandemic	3	2321.66
Pandemic	0	2322.25
Pandemic	0	2322.68
Pandemic	0	2322.77
Pandemic	0	2323.9
Pandemic	3	2324.14
Pandemic	0	2324.73
Pandemic	0	2324.94
Pandemic	0	2325.34
Pandemic	0	2325.94
Pandemic	0	2326.33
Pandemic	0	2326.6
Pandemic	0	2326.86
Pandemic	0	2327.81
Pandemic	2	2328.64
Pandemic	0	2328.84
Pandemic	0	2329.03
Pandemic	1	2329.48
Pandemic	0	2329.6
Pandemic	0	2330.65
Pandemic	0	2331.57
Pandemic	0	2331.59
Pandemic	2	2332.21
Pandemic	0	2333.59
Pandemic	0	2333.73
Pandemic	0	2333.95
Pandemic	0	2334.66
Pandemic	0	2335.55
Pandemic	0	2335.61
Pandemic	0	2336.04
Pandemic	0	2336.11
Pandemic	0	2336.17
Pandemic	1	2336.63
Pandemic	0	2336.97
Pandemic	0	2339.27
Pandemic	0	2339.31
Pandemic	0	2339.9
Pandemic	2	2340.16
Pandemic	0	2340.82
Pandemic	0	2341.34
Pandemic	0	2342.07
Pandemic	0	2342.66
Pandemic	0	2342.8
Pandemic	0	2343.09
Pandemic	0	2343.51
Pandemic	0	2343.7
Pandemic	0	2343.75
Pandemic	0	2343.77
Pandemic	0	2343.84
Pandemic	1	2344.34
Pandemic	0	2345.05
Pandemic	0	2346.58
Pandemic	0	2346.85
Pandemic	0	2347.15
Pandemic	0	2347.42
Pandemic	0	2348.02
Pandemic	0	2348.76
Pandemic	0	2349.52
Pandemic	1	2349.73
Pandemic	0	2349.89
Pandemic	1	2351.59
Pandemic	1	2351.93
Pandemic	0	2352.4
Pandemic	0	2352.44
Pandemic	0	2352.65
Pandemic	1	2353.01
Pandemic	0	2353.38
Pandemic	0	2353.39
Pandemic	0	2353.75
Pandemic	0	2354.65
Pandemic	0	2354.99
Pandemic	0	2354.99
Pandemic	0	2356.6
Pandemic	0	2357.23
Pandemic	0	2357.26
Pandemic	1	2357.64
Pandemic	0	2357.78
Pandemic	0	2359.63
Pandemic	0	2359.87
Pandemic	0	2359.9
Pandemic	0	2361.41
Pandemic	2	2361.58
Pandemic	0	2362.44
Pandemic	0	2362.9
Pandemic	0	2363.31
Pandemic	1	2363.46
Pandemic	0	2363.95
Pandemic	0	2364.47
Pandemic	0	2365.45
Pandemic	0	2365.7
Pandemic	0	2365.84
Pandemic	3	2365.92
Pandemic	0	2365.99
Pandemic	0	2366.83
Pandemic	1	2367.04
Pandemic	0	2367.4
Pandemic	1	2367.54
Pandemic	0	2367.95
Pandemic	0	2368.21
Pandemic	0	2368.27
Pandemic	0	2368.44
Pandemic	2	2368.82
Pandemic	0	2368.98
Pandemic	1	2369.45
Pandemic	0	2369.57
Pandemic	0	2369.83
Pandemic	1	2375.69
Pandemic	2	2375.98
Pandemic	0	2376.2
Pandemic	0	2377.39
Pandemic	0	2377.82
Pandemic	0	2378.1
Pandemic	1	2378.27
Pandemic	0	2378.28
Pandemic	0	2378.52
Pandemic	0	2378.74
Pandemic	0	2378.81
Pandemic	0	2378.87
Pandemic	0	2379.66
Pandemic	0	2379.9
Pandemic	0	2379.94
Pandemic	0	2379.98
Pandemic	0	2380.16
Pandemic	0	2380.17
Pandemic	0	2380.47
Pandemic	0	2380.64
Pandemic	0	2380.65
Pandemic	1	2381.17
Pandemic	0	2381.29
Pandemic	1	2381.36
Pandemic	1	2381.36
Pandemic	0	2382.13
Pandemic	0	2382.4
Pandemic	0	2382.78
Pandemic	0	2383.06
Pandemic	0	2383.49
Pandemic	0	2383.63
Pandemic	1	2383.76
Pandemic	0	2383.95
Pandemic	2	2384.64
Pandemic	0	2385.42
Pandemic	0	2386.37
Pandemic	0	2386.53
Pandemic	0	2386.65
Pandemic	0	2387.2
Pandemic	0	2387.65
Pandemic	0	2388.92
Pandemic	0	2389.13
Pandemic	0	2390.01
Pandemic	0	2390.15
Pandemic	0	2390.24
Pandemic	0	2391
Pandemic	0	2391.21
Pandemic	0	2392.24
Pandemic	0	2392.42
Pandemic	0	2392.51
Pandemic	0	2393.27
Pandemic	0	2394.01
Pandemic	0	2394.68
Pandemic	0	2394.85
Pandemic	0	2394.92
Pandemic	0	2396.15
Pandemic	0	2396.83
Pandemic	0	2396.84
Pandemic	0	2396.85
Pandemic	0	2397.24
Pandemic	0	2397.42
Pandemic	0	2397.52
Pandemic	1	2399.08
Pandemic	0	2399.65
Pandemic	0	2399.79
Pandemic	0	2399.84
Pandemic	0	2400.62
Pandemic	0	2401.03
Pandemic	0	2402.43
Pandemic	0	2403.05
Pandemic	0	2403.33
Pandemic	0	2404.32
Pandemic	0	2404.89
Pandemic	0	2405.68
Pandemic	0	2405.74
Pandemic	0	2405.97
Pandemic	0	2406.09
Pandemic	2	2406.72
Pandemic	0	2406.85
Pandemic	0	2406.95
Pandemic	0	2407.04
Pandemic	0	2407.08
Pandemic	0	2407.28
Pandemic	2	2407.28
Pandemic	0	2407.81
Pandemic	0	2409.06
Pandemic	0	2409.14
Pandemic	0	2409.85
Pandemic	0	2409.99
Pandemic	0	2410.05
Pandemic	0	2410.23
Pandemic	0	2410.47
Pandemic	0	2410.7
Pandemic	0	2411.47
Pandemic	0	2411.6
Pandemic	0	2412.05
Pandemic	0	2412.07
Pandemic	0	2412.49
Pandemic	0	2412.93
Pandemic	0	2413.34
Pandemic	0	2413.68
Pandemic	0	2415.44
Pandemic	0	2415.66
Pandemic	0	2415.73
Pandemic	1	2415.88
Pandemic	0	2415.9
Pandemic	0	2416.61
Pandemic	0	2416.74
Pandemic	1	2416.8
Pandemic	0	2417.04
Pandemic	1	2418.43
Pandemic	0	2418.71
Pandemic	1	2418.72
Pandemic	2	2419.97
Pandemic	0	2420.01
Pandemic	3	2421.11
Pandemic	0	2421.3
Pandemic	0	2421.56
Pandemic	1	2421.62
Pandemic	0	2422.24
Pandemic	0	2422.5
Pandemic	0	2424.59
Pandemic	1	2425.02
Pandemic	0	2425.83
Pandemic	0	2425.85
Pandemic	0	2425.87
Pandemic	0	2426.05
Pandemic	0	2426.56
Pandemic	0	2427.78
Pandemic	0	2427.81
Pandemic	0	2427.98
Pandemic	0	2428.07
Pandemic	1	2428.48
Pandemic	1	2428.7
Pandemic	0	2429.13
Pandemic	1	2429.34
Pandemic	3	2429.55
Pandemic	1	2429.65
Pandemic	0	2430.45
Pandemic	0	2430.6
Pandemic	1	2430.97
Pandemic	0	2431.09
Pandemic	0	2431.11
Pandemic	0	2431.4
Pandemic	0	2431.47
Pandemic	0	2432.18
Pandemic	0	2432.32
Pandemic	0	2432.96
Pandemic	3	2432.96
Pandemic	0	2433.01
Pandemic	0	2433.17
Pandemic	2	2433.33
Pandemic	0	2433.54
Pandemic	0	2433.66
Pandemic	0	2433.71
Pandemic	0	2434.33
Pandemic	0	2434.41
Pandemic	0	2435.17
Pandemic	0	2435.18
Pandemic	0	2435.58
Pandemic	0	2435.74
Pandemic	0	2435.98
Pandemic	0	2435.98
Pandemic	0	2436.55
Pandemic	0	2437.49
Pandemic	0	2437.92
Pandemic	0	2438.74
Pandemic	0	2439.76
Pandemic	1	2439.98
Pandemic	0	2440.04
Pandemic	1	2440.04
Pandemic	0	2440.55
Pandemic	0	2440.61
Pandemic	1	2441.25
Pandemic	0	2442.03
Pandemic	0	2442.38
Pandemic	1	2442.45
Pandemic	0	2442.59
Pandemic	0	2442.88
Pandemic	0	2443.7
Pandemic	1	2443.73
Pandemic	0	2444.23
Pandemic	0	2444.26
Pandemic	1	2444.86
Pandemic	0	2444.9
Pandemic	1	2445.15
Pandemic	0	2446.55
Pandemic	0	2446.66
Pandemic	0	2446.92
Pandemic	0	2447.25
Pandemic	0	2447.44
Pandemic	0	2447.47
Pandemic	0	2447.49
Pandemic	0	2448.08
Pandemic	0	2448.17
Pandemic	0	2448.32
Pandemic	0	2449.17
Pandemic	1	2450.68
Pandemic	0	2450.99
Pandemic	0	2451.17
Pandemic	0	2451.67
Pandemic	0	2451.86
Pandemic	0	2452.56
Pandemic	0	2454.12
Pandemic	0	2454.58
Pandemic	0	2454.93
Pandemic	0	2455.42
Pandemic	1	2456.04
Pandemic	0	2456.2
Pandemic	0	2456.58
Pandemic	0	2456.58
Pandemic	2	2456.72
Pandemic	0	2457.97
Pandemic	0	2458.28
Pandemic	1	2458.28
Pandemic	0	2458.33
Pandemic	0	2458.38
Pandemic	3	2460.27
Pandemic	0	2460.74
Pandemic	1	2461.33
Pandemic	0	2461.39
Pandemic	0	2461.43
Pandemic	0	2461.92
Pandemic	2	2461.98
Pandemic	2	2462.06
Pandemic	1	2462.47
Pandemic	0	2462.72
Pandemic	0	2462.86
Pandemic	0	2463.29
Pandemic	1	2463.57
Pandemic	0	2463.95
Pandemic	0	2464.37
Pandemic	0	2464.71
Pandemic	0	2465.49
Pandemic	0	2465.78
Pandemic	0	2466.92
Pandemic	1	2467.23
Pandemic	0	2467.64
Pandemic	0	2467.99
Pandemic	0	2468.51
Pandemic	0	2468.77
Pandemic	0	2469.48
Pandemic	0	2469.95
Pandemic	0	2470.04
Pandemic	0	2470.04
Pandemic	4	2470.2
Pandemic	0	2470.43
Pandemic	0	2471.58
Pandemic	0	2471.97
Pandemic	0	2472.13
Pandemic	2	2472.36
Pandemic	2	2473.26
Pandemic	0	2473.35
Pandemic	0	2473.78
Pandemic	0	2474.33
Pandemic	0	2474.49
Pandemic	0	2474.56
Pandemic	0	2475.34
Pandemic	0	2475.61
Pandemic	0	2475.67
Pandemic	0	2475.82
Pandemic	0	2476.61
Pandemic	0	2476.61
Pandemic	0	2476.8
Pandemic	0	2476.85
Pandemic	0	2477.37
Pandemic	0	2477.46
Pandemic	0	2477.64
Pandemic	0	2477.82
Pandemic	0	2479.1
Pandemic	0	2479.61
Pandemic	0	2479.79
Pandemic	0	2480.21
Pandemic	0	2480.51
Pandemic	0	2481.2
Pandemic	0	2481.22
Pandemic	0	2481.66
Pandemic	0	2481.8
Pandemic	0	2482.28
Pandemic	0	2482.43
Pandemic	0	2482.57
Pandemic	0	2482.61
Pandemic	0	2483.84
Pandemic	0	2484.17
Pandemic	0	2485.52
Pandemic	0	2485.59
Pandemic	0	2485.97
Pandemic	0	2486.63
Pandemic	0	2487.29
Pandemic	0	2487.29
Pandemic	2	2487.39
Pandemic	0	2487.61
Pandemic	1	2487.98
Pandemic	0	2488.24
Pandemic	0	2488.33
Pandemic	0	2488.48
Pandemic	0	2488.66
Pandemic	0	2488.73
Pandemic	1	2489.25
Pandemic	1	2489.44
Pandemic	0	2489.61
Pandemic	0	2489.83
Pandemic	1	2489.94
Pandemic	1	2489.94
Pandemic	0	2490.41
Pandemic	0	2490.75
Pandemic	0	2491.45
Pandemic	1	2492.09
Pandemic	0	2492.35
Pandemic	2	2492.87
Pandemic	0	2493.06
Pandemic	0	2493.62
Pandemic	0	2493.69
Pandemic	0	2493.72
Pandemic	1	2494.37
Pandemic	1	2494.62
Pandemic	0	2494.76
Pandemic	1	2494.76
Pandemic	0	2495.25
Pandemic	0	2495.35
Pandemic	0	2495.47
Pandemic	0	2495.78
Pandemic	0	2495.96
Pandemic	3	2495.99
Pandemic	0	2496.08
Pandemic	0	2496.3
Pandemic	3	2496.32
Pandemic	0	2496.58
Pandemic	2	2497.57
Pandemic	0	2498.21
Pandemic	0	2498.35
Pandemic	0	2498.44
Pandemic	1	2499.86
Pandemic	1	2499.86
Pandemic	0	2499.91
Pandemic	3	2499.93
Pandemic	0	2500.43
Pandemic	1	2500.43
Pandemic	1	2500.43
Pandemic	0	2500.48
Pandemic	0	2500.55
Pandemic	0	2501.47
Pandemic	0	2502.13
Pandemic	0	2502.51
Pandemic	0	2504.34
Pandemic	0	2504.56
Pandemic	0	2504.57
Pandemic	1	2504.68
Pandemic	0	2505.25
Pandemic	0	2506.66
Pandemic	0	2506.76
Pandemic	0	2507.44
Pandemic	0	2507.8
Pandemic	0	2507.86
Pandemic	0	2508.27
Pandemic	0	2508.79
Pandemic	1	2508.93
Pandemic	0	2509
Pandemic	0	2509.38
Pandemic	0	2509.9
Pandemic	0	2509.91
Pandemic	0	2510.12
Pandemic	0	2510.12
Pandemic	0	2510.26
Pandemic	0	2510.44
Pandemic	0	2511.01
Pandemic	1	2511.17
Pandemic	0	2511.48
Pandemic	0	2511.67
Pandemic	0	2511.91
Pandemic	0	2512.9
Pandemic	0	2513.28
Pandemic	0	2513.98
Pandemic	0	2513.98
Pandemic	0	2514.96
Pandemic	0	2515.1
Pandemic	0	2515.37
Pandemic	1	2515.45
Pandemic	1	2516.11
Pandemic	0	2516.73
Pandemic	0	2516.78
Pandemic	0	2517.44
Pandemic	1	2517.44
Pandemic	0	2517.61
Pandemic	0	2517.72
Pandemic	0	2517.72
Pandemic	0	2518.22
Pandemic	0	2519.56
Pandemic	0	2519.59
Pandemic	0	2519.93
Pandemic	3	2519.95
Pandemic	0	2520.35
Pandemic	0	2521.41
Pandemic	0	2521.41
Pandemic	1	2521.69
Pandemic	0	2522.5
Pandemic	1	2523.15
Pandemic	0	2523.2
Pandemic	0	2524.16
Pandemic	0	2524.17
Pandemic	0	2524.43
Pandemic	0	2525.52
Pandemic	0	2525.72
Pandemic	0	2526.51
Pandemic	0	2527.36
Pandemic	1	2527.38
Pandemic	0	2527.93
Pandemic	0	2528.39
Pandemic	0	2528.45
Pandemic	0	2528.64
Pandemic	1	2528.78
Pandemic	1	2528.81
Pandemic	0	2528.87
Pandemic	0	2528.89
Pandemic	0	2529.02
Pandemic	0	2529.06
Pandemic	1	2529.44
Pandemic	0	2529.96
Pandemic	0	2530.01
Pandemic	0	2530.14
Pandemic	0	2530.71
Pandemic	2	2531.07
Pandemic	1	2531.08
Pandemic	0	2531.96
Pandemic	0	2531.98
Pandemic	0	2532.46
Pandemic	0	2532.54
Pandemic	1	2532.56
Pandemic	0	2532.79
Pandemic	0	2533.43
Pandemic	3	2533.77
Pandemic	0	2533.88
Pandemic	0	2535.01
Pandemic	0	2535.3
Pandemic	2	2535.49
Pandemic	0	2535.58
Pandemic	0	2535.92
Pandemic	0	2536.26
Pandemic	0	2536.59
Pandemic	0	2536.94
Pandemic	0	2537.28
Pandemic	0	2537.48
Pandemic	0	2538.46
Pandemic	0	2538.53
Pandemic	0	2538.93
Pandemic	0	2539.15
Pandemic	0	2539.38
Pandemic	1	2540.5
Pandemic	0	2540.61
Pandemic	0	2541.19
Pandemic	1	2541.39
Pandemic	0	2541.59
Pandemic	0	2541.91
Pandemic	0	2542.02
Pandemic	0	2542.53
Pandemic	0	2542.53
Pandemic	0	2542.95
Pandemic	0	2543.24
Pandemic	1	2543.41
Pandemic	0	2543.58
Pandemic	0	2543.69
Pandemic	0	2543.73
Pandemic	0	2543.8
Pandemic	0	2544.65
Pandemic	0	2544.87
Pandemic	1	2545.27
Pandemic	0	2545.31
Pandemic	1	2545.48
Pandemic	1	2545.79
Pandemic	1	2545.79
Pandemic	0	2545.93
Pandemic	0	2546.02
Pandemic	0	2546.71
Pandemic	0	2547.63
Pandemic	0	2548.23
Pandemic	0	2548.23
Pandemic	0	2548.41
Pandemic	0	2548.68
Pandemic	0	2549.24
Pandemic	0	2550.16
Pandemic	0	2550.7
Pandemic	0	2551.17
Pandemic	1	2551.46
Pandemic	0	2551.79
Pandemic	2	2551.83
Pandemic	0	2552.38
Pandemic	0	2553.23
Pandemic	0	2554.15
Pandemic	0	2554.41
Pandemic	0	2554.43
Pandemic	0	2555.28
Pandemic	0	2555.36
Pandemic	2	2555.41
Pandemic	0	2555.88
Pandemic	0	2555.9
Pandemic	0	2556.04
Pandemic	0	2556.65
Pandemic	0	2557.2
Pandemic	0	2558.03
Pandemic	0	2558.58
Pandemic	0	2558.64
Pandemic	1	2558.84
Pandemic	0	2559.17
Pandemic	0	2559.68
Pandemic	0	2559.96
Pandemic	2	2559.96
Pandemic	1	2560.2
Pandemic	0	2560.25
Pandemic	0	2560.25
Pandemic	0	2560.25
Pandemic	0	2560.43
Pandemic	3	2560.81
Pandemic	0	2561.72
Pandemic	3	2561.75
Pandemic	0	2562.19
Pandemic	0	2562.23
Pandemic	0	2562.29
Pandemic	0	2562.44
Pandemic	0	2562.7
Pandemic	0	2562.73
Pandemic	1	2562.73
Pandemic	2	2563.02
Pandemic	0	2563.14
Pandemic	0	2563.17
Pandemic	0	2563.27
Pandemic	0	2564.43
Pandemic	0	2564.59
Pandemic	0	2564.78
Pandemic	0	2564.83
Pandemic	0	2564.88
Pandemic	0	2564.92
Pandemic	0	2564.99
Pandemic	0	2564.99
Pandemic	0	2565.06
Pandemic	0	2565.06
Pandemic	1	2565.46
Pandemic	1	2565.63
Pandemic	0	2565.77
Pandemic	0	2566
Pandemic	0	2566.54
Pandemic	0	2567.05
Pandemic	0	2567.62
Pandemic	0	2568.55
Pandemic	0	2568.75
Pandemic	0	2568.98
Pandemic	0	2569.24
Pandemic	0	2569.88
Pandemic	0	2569.88
Pandemic	0	2570.22
Pandemic	0	2570.59
Pandemic	1	2571.16
Pandemic	0	2571.37
Pandemic	0	2571.59
Pandemic	0	2571.68
Pandemic	0	2571.87
Pandemic	0	2572.2
Pandemic	2	2572.85
Pandemic	0	2573.14
Pandemic	0	2573.43
Pandemic	3	2573.43
Pandemic	0	2573.57
Pandemic	0	2573.77
Pandemic	0	2573.78
Pandemic	2	2573.8
Pandemic	0	2574.26
Pandemic	0	2574.49
Pandemic	0	2575.32
Pandemic	0	2576.23
Pandemic	0	2576.35
Pandemic	2	2577.15
Pandemic	0	2577.6
Pandemic	0	2577.63
Pandemic	0	2578.84
Pandemic	0	2579.15
Pandemic	0	2579.76
Pandemic	1	2579.81
Pandemic	4	2579.81
Pandemic	0	2580
Pandemic	1	2580.09
Pandemic	0	2580.7
Pandemic	1	2581.02
Pandemic	0	2581.46
Pandemic	0	2581.6
Pandemic	0	2582.19
Pandemic	0	2582.25
Pandemic	0	2582.43
Pandemic	0	2582.45
Pandemic	1	2582.5
Pandemic	0	2583.02
Pandemic	0	2583.27
Pandemic	0	2583.55
Pandemic	0	2583.92
Pandemic	0	2584.14
Pandemic	0	2584.59
Pandemic	0	2584.79
Pandemic	0	2585.14
Pandemic	3	2585.18
Pandemic	1	2585.36
Pandemic	0	2585.53
Pandemic	0	2585.84
Pandemic	0	2586.21
Pandemic	0	2586.26
Pandemic	0	2586.61
Pandemic	0	2587.4
Pandemic	0	2587.65
Pandemic	0	2588.36
Pandemic	0	2588.5
Pandemic	1	2588.69
Pandemic	0	2588.88
Pandemic	3	2589.42
Pandemic	0	2589.82
Pandemic	0	2589.92
Pandemic	0	2589.94
Pandemic	0	2591.29
Pandemic	0	2591.88
Pandemic	0	2592.75
Pandemic	0	2592.96
Pandemic	0	2593.06
Pandemic	1	2593.23
Pandemic	0	2593.63
Pandemic	0	2593.77
Pandemic	0	2594.02
Pandemic	0	2594.41
Pandemic	0	2594.87
Pandemic	0	2594.97
Pandemic	0	2595.4
Pandemic	0	2595.68
Pandemic	0	2595.97
Pandemic	2	2595.97
Pandemic	0	2596.6
Pandemic	0	2597.17
Pandemic	0	2598.23
Pandemic	0	2598.52
Pandemic	0	2598.8
Pandemic	0	2598.86
Pandemic	0	2598.99
Pandemic	0	2599.08
Pandemic	0	2599.13
Pandemic	0	2599.45
Pandemic	1	2599.93
Pandemic	0	2600.01
Pandemic	0	2600.05
Pandemic	0	2600.45
Pandemic	0	2600.93
Pandemic	0	2600.93
Pandemic	0	2601.71
Pandemic	1	2602.49
Pandemic	0	2603.23
Pandemic	0	2603.69
Pandemic	0	2603.73
Pandemic	0	2603.76
Pandemic	0	2604.09
Pandemic	0	2604.19
Pandemic	0	2604.33
Pandemic	0	2604.38
Pandemic	1	2604.47
Pandemic	0	2604.92
Pandemic	1	2604.97
Pandemic	1	2604.97
Pandemic	0	2605.04
Pandemic	0	2605.15
Pandemic	0	2605.26
Pandemic	0	2605.64
Pandemic	3	2605.89
Pandemic	0	2606.31
Pandemic	0	2606.41
Pandemic	0	2606.56
Pandemic	0	2606.74
Pandemic	0	2607.45
Pandemic	0	2608.1
Pandemic	1	2608.16
Pandemic	0	2608.94
Pandemic	0	2609.01
Pandemic	0	2609.1
Pandemic	0	2609.53
Pandemic	2	2609.8
Pandemic	0	2609.97
Pandemic	0	2610.61
Pandemic	1	2610.99
Pandemic	1	2610.99
Pandemic	0	2611.09
Pandemic	0	2611.49
Pandemic	0	2611.67
Pandemic	0	2611.71
Pandemic	0	2611.75
Pandemic	0	2612.13
Pandemic	0	2612.28
Pandemic	0	2612.41
Pandemic	0	2613.6
Pandemic	1	2613.83
Pandemic	0	2613.99
Pandemic	0	2614.68
Pandemic	0	2615.28
Pandemic	0	2615.33
Pandemic	2	2615.53
Pandemic	0	2615.75
Pandemic	0	2615.92
Pandemic	0	2616.24
Pandemic	0	2616.26
Pandemic	0	2616.32
Pandemic	1	2616.66
Pandemic	0	2616.73
Pandemic	1	2616.76
Pandemic	0	2616.8
Pandemic	0	2616.85
Pandemic	0	2617.32
Pandemic	0	2617.51
Pandemic	1	2617.61
Pandemic	0	2617.95
Pandemic	0	2618.65
Pandemic	0	2618.93
Pandemic	0	2619.59
Pandemic	0	2619.86
Pandemic	0	2620.55
Pandemic	0	2621.28
Pandemic	0	2622.66
Pandemic	0	2622.9
Pandemic	0	2622.95
Pandemic	0	2622.99
Pandemic	0	2623.54
Pandemic	3	2623.95
Pandemic	4	2624.06
[truncated: 107,872 more rows]

## Sheet: Fig 2B
Cohort	Height in cm	age_months_height
Pandemic	52.0463	0
Pandemic	55.88	1
Pandemic	62.484	2
Pandemic	64.77	4
Pandemic	68.58	7
Pandemic	75.184	10
Pandemic	81.28	12
Pandemic	84.836	15
Pandemic	86.36	19
Pandemic	92.964	25
Pandemic	98.044	34
Pandemic	50.9003	0
Pandemic	53.34	0
Pandemic	54.61	1
Pandemic	62.9996	3
Pandemic	67.31	6
Pandemic	68.58	7
Pandemic	71.12	10
Pandemic	75.565	12
Pandemic	81.28	16
Pandemic	85.4989	19
Pandemic	86.995	24
Pandemic	48.7566	0
Pandemic	59.69	2
Pandemic	49.53	0
Pandemic	69.85	7
Pandemic	74.168	10
Pandemic	74.676	12
Pandemic	77.216	16
Pandemic	81.28	20
Pandemic	86.36	25
Pandemic	91.44	31
Pandemic	46.99	0
Pandemic	52.4993	0
Pandemic	87.884	21
Pandemic	90.932	27
Pandemic	96.52	33
Pandemic	49.53	0
Pandemic	48.895	0
Pandemic	52.324	1
Pandemic	56.896	2
Pandemic	62.484	4
Pandemic	66.675	7
Pandemic	71.12	9
Pandemic	74.93	12
Pandemic	78.74	15
Pandemic	82.55	19
Pandemic	85.4989	25
Pandemic	92.71	32
Pandemic	51.7525	0
Pandemic	60.325	2
Pandemic	68.5013	4
Pandemic	67.31	5
Pandemic	72.136	6
Pandemic	52.07	0
Pandemic	49.8742	0
Pandemic	58.9991	2
Pandemic	66.04	4
Pandemic	78.74	12
Pandemic	50.5003	0
Pandemic	49.53	0
Pandemic	47.4133	0
Pandemic	50.8	1
Pandemic	60.96	3
Pandemic	67.31	5
Pandemic	69.85	8
Pandemic	73.66	11
Pandemic	74.93	14
Pandemic	82.55	20
Pandemic	86.36	25
Pandemic	92.9996	32
Pandemic	93.98	34
Pandemic	48.895	0
Pandemic	48.26	0
Pandemic	52.07	1
Pandemic	58.0009	2
Pandemic	64.77	4
Pandemic	68.58	6
Pandemic	48.0009	0
Pandemic	48.895	0
Pandemic	59.69	2
Pandemic	64.77	4
Pandemic	68.58	7
Pandemic	77.47	11
Pandemic	78.74	12
Pandemic	97.79	33
Pandemic	51.1387	0
Pandemic	59.69	2
Pandemic	66.04	4
Pandemic	73.025	6
Pandemic	77.724	9
Pandemic	81.28	16
Pandemic	92.456	25
Pandemic	97.0001	33
Pandemic	31.3703	0
Pandemic	35.0004	1
Pandemic	38.6673	2
Pandemic	44.8755	3
Pandemic	53.975	4
Pandemic	59.4995	5
Pandemic	59.8653	6
Pandemic	59.9999	7
Pandemic	72.39	11
Pandemic	78.74	16
Pandemic	52.0344	0
Pandemic	55.88	1
Pandemic	58.9991	2
Pandemic	62.4992	4
Pandemic	67.0001	6
Pandemic	72.39	10
Pandemic	73.66	13
Pandemic	78.74	15
Pandemic	81.9988	19
Pandemic	87.0001	23
Pandemic	86.9975	25
Pandemic	88.0008	26
Pandemic	89.4994	28
Pandemic	90.2005	30
Pandemic	46.9968	0
Pandemic	87.0001	23
Pandemic	52.5602	0
Pandemic	58.928	2
Pandemic	68.9991	6
Pandemic	75.499	10
Pandemic	85.0011	17
Pandemic	86.36	20
Pandemic	87.63	24
Pandemic	87.5995	25
Pandemic	87.0001	27
Pandemic	87.63	30
Pandemic	48.4717	0
Pandemic	50.8	1
Pandemic	57.5005	2
Pandemic	62.23	4
Pandemic	67.31	6
Pandemic	69.85	10
Pandemic	73.66	12
Pandemic	77.47	15
Pandemic	83.82	25
Pandemic	45.085	0
Pandemic	55.88	2
Pandemic	66.04	4
Pandemic	71.12	6
Pandemic	71.12	7
Pandemic	71.755	9
Pandemic	77.47	13
Pandemic	75.499	14
Pandemic	83.82	16
Pandemic	85.09	20
Pandemic	79.9998	21
Pandemic	83.5	22
Pandemic	85.9993	25
Pandemic	95.25	32
Pandemic	93.4999	34
Pandemic	32.6161	0
Pandemic	59.055	3
Pandemic	65.0011	4
Pandemic	68.58	6
Pandemic	74.93	9
Pandemic	77.47	12
Pandemic	81.915	15
Pandemic	86.995	19
Pandemic	87.63	21
Pandemic	91.0006	25
Pandemic	95.25	31
Pandemic	48.26	0
Pandemic	54.102	2
Pandemic	62.23	4
Pandemic	66.04	6
Pandemic	71.12	11
Pandemic	73.66	13
Pandemic	76.2	16
Pandemic	80.01	20
Pandemic	84.0003	24
Pandemic	88.9	31
Pandemic	89.9998	34
Pandemic	47.3075	0
Pandemic	57.15	2
Pandemic	60.96	4
Pandemic	63.5	5
Pandemic	68.7896	7
Pandemic	74.1299	10
Pandemic	76.2	11
Pandemic	76.7994	13
Pandemic	73.66	14
Pandemic	78.7197	15
Pandemic	81.28	19
Pandemic	82.4992	21
Pandemic	85.725	22
Pandemic	84.0003	24
Pandemic	86.4299	25
Pandemic	89.535	31
Pandemic	91.44	35
Pandemic	43.18	0
Pandemic	68.58	26
Pandemic	48.6833	0
Pandemic	78.74	15
Pandemic	78.74	17
Pandemic	88.9	25
Pandemic	92.9996	31
Pandemic	44.1672	0
Pandemic	47.9304	1
Pandemic	52.9996	2
Pandemic	55.5003	3
Pandemic	50.9003	0
Pandemic	57.15	2
Pandemic	64.77	4
Pandemic	67.31	7
Pandemic	78.74	15
Pandemic	83.5	20
Pandemic	87.5005	24
Pandemic	95.25	33
Pandemic	50.4825	0
Pandemic	47.625	0
Pandemic	55.118	2
Pandemic	63.5	4
Pandemic	67.945	6
Pandemic	74.93	11
Pandemic	76.2	13
Pandemic	77.47	15
Pandemic	83.82	20
Pandemic	90.17	27
Pandemic	49.8475	0
Pandemic	53.975	1
Pandemic	54.0004	4
Pandemic	66.04	6
Pandemic	67.31	7
Pandemic	76.2	11
Pandemic	76.2	12
Pandemic	78.74	19
Pandemic	81.28	24
Pandemic	51.5353	0
Pandemic	59.055	2
Pandemic	67.056	5
Pandemic	71.628	8
Pandemic	79.502	12
Pandemic	83.82	16
Pandemic	92.71	26
Pandemic	49.2011	0
Pandemic	53.8455	1
Pandemic	54.8729	2
Pandemic	56.7995	3
Pandemic	67.0001	5
Pandemic	68.58	6
Pandemic	71.0006	8
Pandemic	72.9996	9
Pandemic	74.93	12
Pandemic	75.9993	13
Pandemic	80.5002	14
Pandemic	80.645	15
Pandemic	81.9988	17
Pandemic	84.5007	18
Pandemic	84.0003	20
Pandemic	85.3999	21
Pandemic	87.0001	23
Pandemic	89.9008	25
Pandemic	94.0003	26
Pandemic	94.0003	27
Pandemic	91.9988	29
Pandemic	49.53	0
Pandemic	0
Pandemic	52.4205	0
Pandemic	69.85	6
Pandemic	73.66	10
Pandemic	77.47	12
Pandemic	88.9	19
Pandemic	88.9	20
Pandemic	88.9	22
Pandemic	88.9	23
Pandemic	88.9	24
Pandemic	96.52	31
Pandemic	101.001	34
Pandemic	101.999	35
Pandemic	52.6504	0
Pandemic	50.8	0
Pandemic	48.448	0
Pandemic	49.53	1
Pandemic	55.88	2
Pandemic	63.5	4
Pandemic	67.31	7
Pandemic	74.93	13
Pandemic	73.66	14
Pandemic	86.36	18
Pandemic	86.36	27
Pandemic	50.1498	0
Pandemic	89.9998	21
Pandemic	28.4988	0
Pandemic	48.6296	0
Pandemic	49.2125	0
Pandemic	53.34	1
Pandemic	57.785	2
Pandemic	62.4992	5
Pandemic	66.04	7
Pandemic	72.9996	10
Pandemic	75.0011	13
Pandemic	75.0011	15
Pandemic	50.1536	0
Pandemic	56.388	2
Pandemic	60.96	4
Pandemic	69.85	7
Pandemic	46.99	0
Pandemic	53.34	2
Pandemic	60.96	4
Pandemic	77.47	17
Pandemic	87.0001	28
Pandemic	46.355	0
Pandemic	54.61	2
Pandemic	61.595	4
Pandemic	65.024	6
Pandemic	68.58	9
Pandemic	76.2	13
Pandemic	78.74	15
Pandemic	81.28	19
Pandemic	91.9988	24
Pandemic	96.52	30
Pandemic	50.7763	0
Pandemic	57.15	2
Pandemic	62.23	3
Pandemic	68.58	5
Pandemic	71.12	7
Pandemic	74.93	10
Pandemic	78.74	12
Pandemic	78.74	16
Pandemic	83.82	19
Pandemic	90.17	24
Pandemic	99.9998	32
Pandemic	98.999	34
Pandemic	49.53	0
Pandemic	50.7898	0
Pandemic	60.96	2
Pandemic	64.008	4
Pandemic	67.818	6
Pandemic	78.74	14
Pandemic	86.36	20
Pandemic	90.17	25
Pandemic	49.1084	0
Pandemic	72.644	9
Pandemic	75.184	12
Pandemic	78.74	13
Pandemic	81.1479	15
Pandemic	82.55	16
Pandemic	85.09	19
Pandemic	98.0008	25
Pandemic	92.71	28
Pandemic	94.615	29
Pandemic	99.9998	35
Pandemic	42.9683	0
Pandemic	52.07	3
Pandemic	61.595	6
Pandemic	66.04	8
Pandemic	67.0001	10
Pandemic	71.12	12
Pandemic	78.74	19
Pandemic	81.28	25
Pandemic	85.9993	32
Pandemic	91.44	33
Pandemic	52.705	0
Pandemic	52.07	1
Pandemic	57.15	2
Pandemic	64.77	4
Pandemic	68.58	6
Pandemic	72.39	10
Pandemic	76.2	12
Pandemic	78.74	16
Pandemic	83.82	18
Pandemic	83.82	19
Pandemic	86.3803	25
Pandemic	91.44	31
Pandemic	49.3183	0
Pandemic	53.34	1
Pandemic	56.642	2
Pandemic	60.96	4
Pandemic	65.024	7
Pandemic	72.136	12
Pandemic	86.36	26
Pandemic	49.2633	0
Pandemic	55.245	2
Pandemic	67.0001	4
Pandemic	71.0006	6
Pandemic	75.499	9
Pandemic	77.0001	12
Pandemic	80.3694	13
Pandemic	50.8	0
Pandemic	48.2448	0
Pandemic	67.31	8
Pandemic	83.82	23
Pandemic	84.0003	27
Pandemic	48.26	0
Pandemic	52.0827	0
Pandemic	58.0009	2
Pandemic	62.23	3
Pandemic	65.405	4
Pandemic	49.53	0
Pandemic	46.99	0
Pandemic	51.4485	0
Pandemic	57.404	2
Pandemic	64.77	4
Pandemic	67.564	6
Pandemic	73.152	9
Pandemic	81.28	14
Pandemic	80.772	17
Pandemic	81.915	20
Pandemic	88.9	25
Pandemic	51.9989	0
Pandemic	46.355	0
Pandemic	53.34	1
Pandemic	57.15	2
Pandemic	60.96	5
Pandemic	51.0007	0
Pandemic	49.13	0
Pandemic	52.07	1
Pandemic	57.15	2
Pandemic	62.9996	5
Pandemic	68.9991	6
Pandemic	74.93	9
Pandemic	77.0001	12
Pandemic	78.0009	15
Pandemic	85.0011	19
Pandemic	85.9993	24
Pandemic	87.0001	26
Pandemic	48.5153	0
Pandemic	56.515	2
Pandemic	65.0011	5
Pandemic	69.4995	7
Pandemic	73.025	11
Pandemic	77.0001	13
Pandemic	78.0009	16
Pandemic	83.312	20
Pandemic	88.5012	27
Pandemic	93.9013	34
Pandemic	48.26	0
Pandemic	57.0001	2
Pandemic	68.58	6
Pandemic	81.28	17
Pandemic	48.387	0
Pandemic	58.42	2
Pandemic	79.248	14
Pandemic	83.82	17
Pandemic	93.98	31
Pandemic	45.72	0
Pandemic	56.515	3
Pandemic	62.23	5
Pandemic	66.04	8
Pandemic	73.66	13
Pandemic	76.2	17
Pandemic	81.28	26
Pandemic	45.72	0
Pandemic	77.47	15
Pandemic	83.82	21
Pandemic	81.501	26
Pandemic	51.0007	0
Pandemic	43.7269	0
Pandemic	55.118	2
Pandemic	71.12	7
Pandemic	76.708	10
Pandemic	81.28	15
Pandemic	50.8	0
Pandemic	49.9999	0
Pandemic	52.07	0
Pandemic	54.61	1
Pandemic	57.15	2
Pandemic	64.516	4
Pandemic	63.754	6
Pandemic	71.882	9
Pandemic	76.708	12
Pandemic	82.55	16
Pandemic	87.63	21
Pandemic	89.535	24
Pandemic	93.98	31
Pandemic	51.5353	0
Pandemic	59.69	2
Pandemic	66.675	4
Pandemic	73.025	6
Pandemic	71.9988	7
Pandemic	77.47	9
Pandemic	85.725	13
Pandemic	85.725	15
Pandemic	91.44	19
Pandemic	91.44	22
Pandemic	94.615	25
Pandemic	97.0001	27
Pandemic	50.8	0
Pandemic	53.34	1
Pandemic	58.42	3
Pandemic	63.5	5
Pandemic	68.58	7
Pandemic	71.12	9
Pandemic	73.66	12
Pandemic	81.28	21
Pandemic	85.09	24
Pandemic	86.36	27
Pandemic	51.8346	0
Pandemic	58.42	2
Pandemic	65.0011	5
Pandemic	68.58	7
Pandemic	76.2	12
Pandemic	78.74	16
Pandemic	81.28	18
Pandemic	83.82	19
Pandemic	52.4933	0
Pandemic	58.42	2
Pandemic	62.484	4
Pandemic	68.58	6
Pandemic	76.708	12
Pandemic	82.55	17
Pandemic	87.376	21
Pandemic	91.44	25
Pandemic	92.075	31
Pandemic	50.9676	0
Pandemic	55.88	2
Pandemic	63.5	5
Pandemic	66.04	6
Pandemic	68.58	9
Pandemic	73.66	13
Pandemic	78.74	16
Pandemic	49.4995	0
Pandemic	51.9989	0
Pandemic	48.3794	0
Pandemic	55.245	2
Pandemic	61.9125	6
Pandemic	68.58	11
Pandemic	72.39	12
Pandemic	76.2	16
Pandemic	79.0575	19
Pandemic	83.82	21
Pandemic	83.82	22
Pandemic	88.9	26
Pandemic	90.2005	30
Pandemic	50.8	0
Pandemic	60.325	2
Pandemic	66.675	4
Pandemic	47.6597	0
Pandemic	56.1696	1
Pandemic	58.42	2
Pandemic	59.9999	4
Pandemic	63.5	5
Pandemic	69.9999	6
Pandemic	68.0009	7
Pandemic	70.7898	8
Pandemic	74.1307	9
Pandemic	82.8497	12
Pandemic	79.248	15
Pandemic	82.55	19
Pandemic	89.535	25
Pandemic	93.98	30
Pandemic	48.768	0
Pandemic	53.2371	1
Pandemic	55.0012	2
Pandemic	70.5002	7
Pandemic	51.9989	0
Pandemic	70.5002	6
Pandemic	73.5508	15
Pandemic	75.692	17
Pandemic	75.9993	18
Pandemic	49.1761	0
Pandemic	91.44	25
Pandemic	91.44	28
Pandemic	98.999	31
Pandemic	51.1499	0
Pandemic	53.6575	1
Pandemic	59.055	2
Pandemic	67.31	4
Pandemic	71.12	6
Pandemic	73.66	9
Pandemic	78.0009	12
Pandemic	82.2744	15
Pandemic	87.5005	19
Pandemic	89.9998	21
Pandemic	90.5002	24
Pandemic	90.5002	25
Pandemic	50.2768	0
Pandemic	53.34	1
Pandemic	64.77	5
Pandemic	67.945	7
Pandemic	71.12	9
Pandemic	76.2	14
Pandemic	77.47	16
Pandemic	80.01	19
Pandemic	80.01	21
Pandemic	83.82	24
Pandemic	88.0008	32
Pandemic	52.2817	0
Pandemic	57.15	1
Pandemic	59.69	2
Pandemic	67.31	4
Pandemic	72.39	6
Pandemic	76.2	9
Pandemic	81.28	12
Pandemic	87.63	15
Pandemic	90.5002	19
Pandemic	95.25	25
Pandemic	100.33	32
Pandemic	52.1703	0
Pandemic	55.88	1
Pandemic	71.12	6
Pandemic	71.6001	10
Pandemic	75.9993	12
Pandemic	78.5012	13
Pandemic	87.2007	24
Pandemic	46.99	0
Pandemic	45.72	0
Pandemic	73.66	14
Pandemic	50.1498	0
Pandemic	60.96	2
Pandemic	61.0006	3
Pandemic	66.04	4
Pandemic	71.12	6
Pandemic	73.66	9
Pandemic	79.375	12
Pandemic	81.915	16
Pandemic	85.09	19
Pandemic	46.99	0
Pandemic	46.5667	0
Pandemic	61.9989	3
Pandemic	63.5	4
Pandemic	66.04	6
Pandemic	72.39	9
Pandemic	76.2	12
Pandemic	83.82	17
Pandemic	87.0001	20
Pandemic	90.5002	25
Pandemic	50.9003	0
Pandemic	55.88	1
Pandemic	58.674	2
Pandemic	61.0006	3
Pandemic	72.644	5
Pandemic	71.628	6
Pandemic	73.66	9
Pandemic	78.105	12
Pandemic	81.28	17
Pandemic	81.28	20
Pandemic	83.82	21
Pandemic	92.4001	24
Pandemic	99.06	32
Pandemic	42.5221	0
Pandemic	53.848	2
Pandemic	90.17	25
Pandemic	51.9989	0
Pandemic	48.6296	0
Pandemic	50.8	1
Pandemic	58.9991	3
Pandemic	63.5	4
Pandemic	71.0006	7
Pandemic	75.0011	9
Pandemic	81.0006	12
Pandemic	78.74	15
Pandemic	85.9993	19
Pandemic	52.705	0
Pandemic	48.26	0
Pandemic	50.8	0
Pandemic	59.69	2
Pandemic	65.499	3
Pandemic	69.596	5
Pandemic	71.628	7
Pandemic	76.2	10
Pandemic	92.456	25
Pandemic	92.456	26
Pandemic	48.26	0
Pandemic	49.53	0
Pandemic	56.388	2
Pandemic	67.31	6
Pandemic	77.47	12
Pandemic	48.6899	0
Pandemic	55.0012	2
Pandemic	57.0001	3
Pandemic	62.9996	4
Pandemic	65.499	6
Pandemic	69.85	9
Pandemic	74.5007	12
Pandemic	78.9965	13
Pandemic	80.5002	18
Pandemic	80.645	20
Pandemic	80.5002	23
Pandemic	83.82	25
Pandemic	88.9	30
Pandemic	87.8002	32
Pandemic	48.895	0
Pandemic	66.04	5
Pandemic	68.58	6
Pandemic	73.66	9
Pandemic	75.184	12
Pandemic	83.185	19
Pandemic	91.44	27
Pandemic	49.4199	0
Pandemic	55.88	2
Pandemic	60.96	4
Pandemic	65.0011	6
Pandemic	71.12	10
Pandemic	77.249	13
Pandemic	87.5005	24
Pandemic	93.98	31
Pandemic	49.53	0
Pandemic	55.88	2
Pandemic	59.69	3
Pandemic	63.5	4
Pandemic	68.58	6
Pandemic	71.12	9
Pandemic	76.2	12
Pandemic	79.248	14
Pandemic	81.28	15
Pandemic	84.328	18
Pandemic	88.265	24
Pandemic	91.44	31
Pandemic	95.504	32
Pandemic	105.41	34
Pandemic	50.8	0
Pandemic	61.0006	2
Pandemic	64.0004	4
Pandemic	71.0006	7
Pandemic	78.5012	10
Pandemic	77.47	12
Pandemic	77.47	13
Pandemic	88.0008	25
Pandemic	37.7501	0
Pandemic	40.894	1
Pandemic	46.3601	2
Pandemic	47.0002	3
Pandemic	50.8	4
Pandemic	58.42	8
Pandemic	64.0004	11
Pandemic	67.31	13
Pandemic	73.66	17
Pandemic	75.565	20
Pandemic	78.105	24
Pandemic	80.5002	27
Pandemic	84.0003	30
Pandemic	48.6296	0
Pandemic	60.96	3
Pandemic	63.5	5
Pandemic	71.12	7
Pandemic	73.66	9
Pandemic	81.026	13
Pandemic	81.28	15
Pandemic	86.36	21
Pandemic	89.9998	24
Pandemic	53.1698	0
Pandemic	62.23	2
Pandemic	71.12	5
Pandemic	72.39	7
Pandemic	75.565	10
Pandemic	80.01	15
Pandemic	84.7281	17
Pandemic	86.36	20
Pandemic	92.075	27
Pandemic	96.52	33
Pandemic	48.9991	0
Pandemic	46.99	0
Pandemic	52.5467	0
Pandemic	48.26	0
Pandemic	64.5008	8
Pandemic	75.9993	14
Pandemic	77.5005	17
Pandemic	84.201	25
Pandemic	84.0003	28
Pandemic	84.0003	30
Pandemic	87.0001	33
Pandemic	45.72	0
Pandemic	53.34	2
Pandemic	58.42	5
Pandemic	66.04	7
Pandemic	71.12	13
Pandemic	81.9988	24
Pandemic	91.44	34
Pandemic	45.6982	0
Pandemic	49.4995	1
Pandemic	55.88	2
Pandemic	62.3011	4
Pandemic	66.04	6
Pandemic	69.9999	9
Pandemic	76.2	13
Pandemic	81.28	16
Pandemic	81.28	18
Pandemic	86.36	25
Pandemic	92.4992	31
Pandemic	49.53	0
Pandemic	82.804	19
Pandemic	48.895	0
Pandemic	57.15	2
Pandemic	61.595	4
Pandemic	68.58	7
Pandemic	72.39	9
Pandemic	75.565	13
Pandemic	80.01	16
Pandemic	80.645	19
Pandemic	87.63	26
Pandemic	90.17	31
Pandemic	49.4453	0
Pandemic	56.896	2
Pandemic	62.23	4
Pandemic	71.12	6
Pandemic	72.644	12
Pandemic	77.216	16
Pandemic	81.28	19
Pandemic	81.915	24
Pandemic	85.09	30
Pandemic	48.26	0
Pandemic	56.388	2
Pandemic	62.23	4
Pandemic	67.31	6
Pandemic	71.12	9
Pandemic	72.136	12
Pandemic	80.264	16
Pandemic	81.28	18
Pandemic	83.82	24
Pandemic	86.868	30
Pandemic	86.36	31
Pandemic	48.26	0
Pandemic	49.53	1
Pandemic	57.15	2
Pandemic	62.23	4
Pandemic	66.04	6
Pandemic	68.58	9
Pandemic	73.66	12
Pandemic	81.28	16
Pandemic	83.82	19
Pandemic	91.44	24
Pandemic	93.9495	31
Pandemic	100.433	32
Pandemic	96.4006	33
Pandemic	50.8	0
Pandemic	37.7508	0
Pandemic	96.52	20
Pandemic	92.4992	31
Pandemic	50.8	0
Pandemic	62.23	2
Pandemic	67.31	4
Pandemic	69.85	6
Pandemic	72.39	9
Pandemic	77.47	12
Pandemic	81.28	16
Pandemic	83.82	19
Pandemic	87.63	24
Pandemic	90.17	31
Pandemic	49.4005	0
Pandemic	69.85	7
Pandemic	71.12	9
Pandemic	48.9991	0
Pandemic	63.5	2
Pandemic	72.39	7
Pandemic	80.01	12
Pandemic	85.09	19
Pandemic	86.36	25
Pandemic	50.8	0
Pandemic	49.3395	0
Pandemic	57.15	2
Pandemic	64.135	4
Pandemic	67.945	6
Pandemic	74.93	10
Pandemic	76.2	13
Pandemic	85.09	20
Pandemic	91.44	25
Pandemic	51.0007	0
Pandemic	73.66	10
Pandemic	74.0004	11
Pandemic	78.0009	13
Pandemic	87.0001	22
Pandemic	85.5993	25
Pandemic	47.625	0
Pandemic	52.3562	0
Pandemic	55.0012	2
Pandemic	43.5	0
Pandemic	52.6627	0
Pandemic	63.5	2
Pandemic	68.58	4
Pandemic	73.66	7
Pandemic	87.63	18
Pandemic	50.9003	0
Pandemic	58.42	2
Pandemic	61.9989	3
Pandemic	64.77	4
Pandemic	71.12	6
Pandemic	74.0004	7
Pandemic	73.3298	9
Pandemic	76.2	12
Pandemic	80.01	15
Pandemic	85.09	19
Pandemic	88.9	22
Pandemic	92.71	24
Pandemic	92.4035	28
Pandemic	90.17	30
Pandemic	94.201	31
Pandemic	97.2998	33
Pandemic	49.53	0
Pandemic	48.895	1
Pandemic	57.15	2
Pandemic	68.58	6
Pandemic	73.66	8
Pandemic	75.565	9
Pandemic	78.74	12
Pandemic	88.9	18
Pandemic	88.9	21
Pandemic	92.71	25
Pandemic	96.52	30
Pandemic	52.4933	0
Pandemic	60.96	2
Pandemic	67.31	4
Pandemic	45.72	0
Pandemic	48.26	0
Pandemic	0
Pandemic	51.4248	0
Pandemic	59.055	2
Pandemic	64.77	4
Pandemic	74.93	8
Pandemic	78.74	12
Pandemic	82.55	16
Pandemic	88.9	22
Pandemic	91.44	25
Pandemic	49.53	0
Pandemic	83.82	31
Pandemic	45.72	0
Pandemic	50.8	0
Pandemic	52.4993	1
Pandemic	57.15	2
Pandemic	64.77	4
Pandemic	70.485	6
Pandemic	74.93	9
Pandemic	80.645	12
Pandemic	81.28	15
Pandemic	84.455	19
Pandemic	88.5012	25
Pandemic	92.9996	30
Pandemic	52.0344	0
Pandemic	57.15	1
Pandemic	59.69	2
Pandemic	66.04	4
Pandemic	82.55	19
Pandemic	96.52	34
Pandemic	48.1965	0
Pandemic	53.34	1
Pandemic	55.88	2
Pandemic	67.945	6
Pandemic	68.58	7
Pandemic	73.66	9
Pandemic	77.978	14
Pandemic	76.2	15
Pandemic	81.915	18
Pandemic	93.98	24
Pandemic	96.52	31
Pandemic	46.99	0
Pandemic	58.42	3
Pandemic	64.77	6
Pandemic	64.77	7
Pandemic	73.66	13
Pandemic	78.74	16
Pandemic	83.82	19
Pandemic	88.392	26
Pandemic	91.44	32
Pandemic	51.2665	0
Pandemic	52.2491	1
Pandemic	58.0009	2
Pandemic	67.31	6
Pandemic	68.9991	8
Pandemic	75.499	13
Pandemic	77.5005	16
Pandemic	81.28	19
Pandemic	84.0003	22
Pandemic	84.6988	24
Pandemic	85.0011	26
Pandemic	93.218	32
Pandemic	48.6664	0
Pandemic	49.9999	1
Pandemic	55.0012	2
Pandemic	61.0006	4
Pandemic	68.9991	8
Pandemic	72.9996	10
Pandemic	75.565	15
Pandemic	50.3335	0
Pandemic	52.705	1
Pandemic	56.4998	2
Pandemic	62.865	4
Pandemic	68.0009	6
Pandemic	71.0006	9
Pandemic	72.9996	10
Pandemic	75.0011	12
Pandemic	77.0001	13
Pandemic	77.5005	15
Pandemic	83.82	18
Pandemic	88.265	24
Pandemic	96.1009	31
Pandemic	49.2125	0
Pandemic	56.642	2
Pandemic	63.5	4
Pandemic	66.04	6
Pandemic	73.152	12
Pandemic	77.47	14
Pandemic	80.645	17
Pandemic	83.82	20
Pandemic	87.63	24
Pandemic	92.075	31
Pandemic	50.4977	0
Pandemic	46.355	0
Pandemic	57.15	2
Pandemic	66.04	5
Pandemic	63.5	6
Pandemic	71.12	9
Pandemic	76.2	12
Pandemic	78.74	15
Pandemic	81.915	18
Pandemic	85.1992	21
Pandemic	91.44	24
Pandemic	96.52	31
Pandemic	35.499	0
Pandemic	40.1	1
Pandemic	43.815	2
Pandemic	52.07	3
Pandemic	54.864	4
Pandemic	67.0001	6
Pandemic	66.4997	7
Pandemic	71.12	10
Pandemic	74.93	12
Pandemic	48.0009	0
Pandemic	93.98	33
Pandemic	48.4988	0
Pandemic	48.9991	0
Pandemic	45.212	0
Pandemic	55.88	2
Pandemic	63.5	4
Pandemic	67.5005	5
Pandemic	69.85	6
Pandemic	69.9999	7
Pandemic	72.4992	8
Pandemic	76.4997	11
Pandemic	76.4997	17
Pandemic	49.53	0
Pandemic	50.8	0
Pandemic	47.4713	0
Pandemic	55.88	2
Pandemic	60.325	4
Pandemic	64.77	7
Pandemic	69.85	9
Pandemic	74.295	13
Pandemic	76.962	15
Pandemic	81.0006	18
Pandemic	51.2233	0
Pandemic	58.42	2
Pandemic	76.2	8
Pandemic	85.09	20
Pandemic	90.17	25
Pandemic	91.9988	31
Pandemic	51.5993	0
Pandemic	54.61	1
Pandemic	59.055	2
Pandemic	63.5	5
Pandemic	68.58	6
Pandemic	72.39	9
Pandemic	76.2	12
Pandemic	78.74	15
Pandemic	76.2	17
Pandemic	81.28	18
Pandemic	82.55	24
Pandemic	87.63	31
Pandemic	91.9988	34
Pandemic	40.0196	0
Pandemic	52.9996	2
Pandemic	51.0007	0
Pandemic	50.6501	0
Pandemic	55.88	2
Pandemic	62.23	5
Pandemic	67.818	7
Pandemic	71.501	9
Pandemic	73.66	12
Pandemic	76.708	15
Pandemic	84.836	19
Pandemic	84.8004	21
Pandemic	88.9	27
Pandemic	91.948	32
Pandemic	91.948	34
Pandemic	47.498	0
Pandemic	74.93	13
Pandemic	78.74	14
Pandemic	77.47	15
Pandemic	82.55	18
Pandemic	88.9	20
Pandemic	91.44	21
Pandemic	86.36	23
Pandemic	88.9	25
Pandemic	91.6263	26
Pandemic	92.3011	27
Pandemic	97.79	28
Pandemic	92.71	29
Pandemic	95.123	30
Pandemic	93.98	31
Pandemic	97.8954	34
Pandemic	51.1023	0
Pandemic	62.23	3
Pandemic	85.09	17
Pandemic	96.4997	32
Pandemic	44.334	0
Pandemic	78.74	20
Pandemic	45.72	0
Pandemic	49.9999	1
Pandemic	54.61	2
Pandemic	62.23	4
Pandemic	65.9994	7
Pandemic	68.58	9
Pandemic	75.0011	14
Pandemic	75.9993	16
Pandemic	78.74	17
Pandemic	79.9998	18
Pandemic	88.9	34
Pandemic	49.298	0
Pandemic	63.5	3
Pandemic	52.07	0
Pandemic	53.34	1
Pandemic	60.96	2
Pandemic	60.96	4
Pandemic	64.77	5
Pandemic	69.9999	7
Pandemic	73.0123	9
Pandemic	78.0009	15
Pandemic	78.74	16
Pandemic	45.72	0
Pandemic	53.34	2
Pandemic	48.26	0
Pandemic	50.3767	0
Pandemic	58.42	2
Pandemic	51.435	0
Pandemic	48.895	0
Pandemic	50.8	2
Pandemic	61.0006	3
Pandemic	71.9988	7
Pandemic	74.0994	8
Pandemic	69.9999	9
Pandemic	78.0009	13
Pandemic	97.5004	34
Pandemic	53.34	0
Pandemic	60.96	2
Pandemic	67.31	4
Pandemic	73.025	7
Pandemic	73.66	9
Pandemic	76.2	13
Pandemic	81.28	16
Pandemic	83.82	20
Pandemic	88.9	23
Pandemic	99.568	34
Pandemic	41.667	0
Pandemic	42.5894	1
Pandemic	47.752	2
Pandemic	54.61	4
Pandemic	57.0001	5
Pandemic	61.214	7
Pandemic	60.96	8
Pandemic	68.58	10
Pandemic	71.755	13
Pandemic	77.0001	15
Pandemic	75.9993	18
Pandemic	76.2	20
Pandemic	82.55	27
Pandemic	83.82	32
Pandemic	48.3489	0
Pandemic	57.0001	2
Pandemic	66.0006	5
Pandemic	69.6684	6
Pandemic	30.6254	0
Pandemic	35.6001	1
Pandemic	40.8743	2
Pandemic	46	3
Pandemic	51.4995	4
Pandemic	53.9999	5
Pandemic	57.7507	6
Pandemic	68.0009	9
Pandemic	67.31	10
Pandemic	73.5	16
Pandemic	88.7501	30
Pandemic	89.9998	31
Pandemic	55.0012	0
Pandemic	35.499	0
Pandemic	39.7502	1
Pandemic	46.4964	2
Pandemic	52.07	4
Pandemic	55.9994	5
Pandemic	56.4401	6
Pandemic	60.96	9
Pandemic	63.2003	10
Pandemic	68.58	12
Pandemic	69.85	15
Pandemic	74.93	17
Pandemic	83.82	29
Pandemic	51.8528	0
Pandemic	58.42	2
Pandemic	67.945	4
Pandemic	71.12	6
Pandemic	79.9998	12
Pandemic	86.36	17
Pandemic	88.0008	21
Pandemic	94.9452	24
Pandemic	97.2998	31
Pandemic	51.0184	0
Pandemic	56.896	1
Pandemic	59.69	2
Pandemic	64.77	4
Pandemic	64.77	6
Pandemic	76.708	15
Pandemic	92.9996	29
Pandemic	91.44	31
Pandemic	50.1294	0
Pandemic	59.69	2
Pandemic	71.755	7
Pandemic	78.5012	11
Pandemic	87.0001	18
Pandemic	50.9473	0
Pandemic	61.9989	3
Pandemic	68.9991	6
Pandemic	85.09	13
Pandemic	88.9991	24
Pandemic	97.79	29
Pandemic	49.2684	0
Pandemic	62.23	4
Pandemic	73.66	7
Pandemic	73.66	8
Pandemic	83.82	13
Pandemic	97.79	33
Pandemic	48.26	0
Pandemic	51.562	0
Pandemic	55.88	1
Pandemic	63.5	3
Pandemic	69.342	5
Pandemic	70.612	7
Pandemic	76.2	12
Pandemic	86.36	25
Pandemic	48.26	0
Pandemic	53.34	1
Pandemic	57.0001	2
Pandemic	64.77	4
Pandemic	68.5013	6
Pandemic	77.47	13
Pandemic	82.55	20
Pandemic	86.995	25
Pandemic	49.8927	0
Pandemic	52.9996	1
Pandemic	59.69	2
Pandemic	66.04	4
Pandemic	72.39	7
Pandemic	77.0001	10
Pandemic	80.01	12
Pandemic	81.0006	15
Pandemic	87.63	18
Pandemic	91.0006	24
Pandemic	91.9988	25
Pandemic	94.0003	31
Pandemic	50.8	0
Pandemic	54.61	1
Pandemic	59.69	2
Pandemic	64.5871	4
Pandemic	68.58	6
Pandemic	75.565	12
Pandemic	83.82	18
Pandemic	85.725	22
Pandemic	85.6005	23
Pandemic	87.63	24
Pandemic	95.885	31
Pandemic	53.5413	0
Pandemic	55.88	1
Pandemic	60.9994	2
Pandemic	64.8348	4
Pandemic	69.85	6
Pandemic	75.0011	9
Pandemic	75.565	11
Pandemic	75.9993	12
Pandemic	77.3989	16
Pandemic	80.5002	18
Pandemic	86.4574	25
Pandemic	91.9988	31
Pandemic	49.0068	0
Pandemic	55.245	2
Pandemic	60.325	5
Pandemic	66.04	7
Pandemic	71.12	12
Pandemic	84.0003	21
Pandemic	81.9988	23
Pandemic	85.9993	24
Pandemic	84.3013	25
Pandemic	48.26	0
Pandemic	44.45	0
Pandemic	46.9951	0
Pandemic	52.0344	0
Pandemic	66.7995	5
Pandemic	79.9998	17
Pandemic	90.5002	27
Pandemic	50.7492	0
Pandemic	54.5008	1
Pandemic	58.4098	2
Pandemic	64.135	4
Pandemic	68.0009	9
Pandemic	47.3799	0
Pandemic	50.8	1
Pandemic	59.9999	3
Pandemic	64.77	5
Pandemic	67.0001	6
Pandemic	75.9993	14
Pandemic	82.9996	23
Pandemic	88.9	30
Pandemic	52.0344	0
Pandemic	54.4034	1
Pandemic	59.055	2
Pandemic	64.77	4
Pandemic	65.0011	5
Pandemic	72.39	7
Pandemic	83.82	12
Pandemic	86.0298	15
Pandemic	88.9	19
Pandemic	89.9998	22
Pandemic	91.501	25
Pandemic	96.52	32
Pandemic	49.53	0
Pandemic	52.705	1
Pandemic	57.15	2
Pandemic	63.5	4
Pandemic	68.58	7
Pandemic	73.66	11
Pandemic	73.66	13
Pandemic	86.36	25
Pandemic	48.895	0
Pandemic	57.15	2
Pandemic	62.23	4
Pandemic	68.58	7
Pandemic	47.0002	0
Pandemic	50.8	0
Pandemic	63.754	5
Pandemic	66.04	6
Pandemic	71.628	9
Pandemic	78.0009	13
Pandemic	72.39	14
Pandemic	81.28	16
Pandemic	83.82	20
Pandemic	87.63	25
Pandemic	89.9998	31
Pandemic	47.3075	0
Pandemic	51.0007	1
Pandemic	57.15	2
Pandemic	63.5	4
Pandemic	66.04	6
Pandemic	71.12	11
Pandemic	71.12	12
Pandemic	74.295	15
Pandemic	81.28	21
Pandemic	82.55	25
Pandemic	90.17	31
Pandemic	50.8	0
Pandemic	51.435	1
Pandemic	58.0009	2
Pandemic	61.0006	4
Pandemic	65.405	7
Pandemic	71.12	11
Pandemic	76.2	17
Pandemic	83.185	27
Pandemic	47.3075	0
Pandemic	55.88	2
Pandemic	62.23	4
Pandemic	66.04	6
Pandemic	73.66	10
Pandemic	76.708	12
Pandemic	78.9991	15
Pandemic	81.9988	19
Pandemic	86.36	24
Pandemic	93.98	31
Pandemic	45.3625	0
Pandemic	49.5008	1
Pandemic	53.7007	2
Pandemic	61.0006	4
Pandemic	65.499	6
Pandemic	68.0009	9
Pandemic	72.4992	12
Pandemic	76.2	15
Pandemic	77.47	18
Pandemic	80.5002	19
Pandemic	50.546	0
Pandemic	57.658	2
Pandemic	65.405	4
Pandemic	67.31	6
Pandemic	64.4398	8
Pandemic	72.9488	9
Pandemic	77.216	14
Pandemic	81.28	22
Pandemic	85.8012	24
Pandemic	90.17	29
Pandemic	49.53	0
Pandemic	48.26	0
Pandemic	53.2498	0
Pandemic	57.15	1
Pandemic	66.4997	4
Pandemic	67.31	6
Pandemic	71.12	10
Pandemic	74.5007	13
Pandemic	80.01	16
Pandemic	86.36	18
Pandemic	81.8007	20
Pandemic	85.09	22
Pandemic	85.0011	25
Pandemic	94.3	33
Pandemic	49.4995	0
Pandemic	48.6296	0
Pandemic	58.0009	2
Pandemic	63.5	4
Pandemic	69.215	7
Pandemic	74.93	11
Pandemic	78.0009	12
Pandemic	85.09	20
Pandemic	89.535	25
Pandemic	93.4999	33
Pandemic	51.8998	0
Pandemic	58.0009	1
Pandemic	59.4995	2
Pandemic	66.04	4
Pandemic	71.9988	7
Pandemic	77.5005	10
Pandemic	78.0009	13
Pandemic	87.63	16
Pandemic	85.9993	19
Pandemic	46.99	0
Pandemic	55.88	2
Pandemic	62.23	4
Pandemic	67.056	7
Pandemic	73.66	11
Pandemic	75.184	13
Pandemic	79.756	16
Pandemic	84.328	19
Pandemic	87.884	26
Pandemic	50.8	0
Pandemic	51.67	0
Pandemic	102.87	29
Pandemic	47.6123	0
Pandemic	81.9988	15
Pandemic	81.915	17
Pandemic	81.9988	18
Pandemic	81.9988	19
Pandemic	84.0003	20
Pandemic	84.8004	24
Pandemic	86.36	25
Pandemic	49.8475	0
Pandemic	53.34	1
Pandemic	57.15	2
Pandemic	61.722	4
Pandemic	70.612	7
Pandemic	71.0006	9
Pandemic	74.93	12
Pandemic	77.1195	14
Pandemic	83.82	18
Pandemic	85.0011	20
Pandemic	88.9	25
Pandemic	93.98	31
Pandemic	50.125	0
Pandemic	52.4999	1
Pandemic	54.6009	2
Pandemic	54.0004	3
Pandemic	59.1998	4
Pandemic	60.5003	5
Pandemic	62.9289	6
Pandemic	62.8328	7
Pandemic	63.2498	8
Pandemic	68.0009	10
Pandemic	71.4002	11
Pandemic	72.9996	12
Pandemic	74.0004	14
Pandemic	75.5863	15
Pandemic	77.47	17
Pandemic	77.7946	18
Pandemic	80.6683	19
Pandemic	83.82	20
Pandemic	80.6061	21
Pandemic	74.0986	23
Pandemic	74.2975	24
Pandemic	80.4266	25
Pandemic	84.2988	27
Pandemic	87.9996	28
Pandemic	87.5005	29
Pandemic	87.0001	32
Pandemic	92.5	33
Pandemic	88.9	34
Pandemic	48.26	0
Pandemic	55.88	2
Pandemic	63.6905	4
Pandemic	68.58	7
Pandemic	73.66	9
Pandemic	79.248	13
Pandemic	79.6011	18
Pandemic	88.0008	25
Pandemic	49.53	0
Pandemic	53.34	1
Pandemic	57.785	2
Pandemic	65.278	5
Pandemic	67.31	7
Pandemic	76.2	10
Pandemic	78.994	15
Pandemic	86.868	26
Pandemic	52.0344	0
Pandemic	52.6898	0
Pandemic	60.96	2
Pandemic	69.85	4
Pandemic	73.66	6
Pandemic	81.28	12
Pandemic	85.725	15
Pandemic	91.44	19
Pandemic	92.4903	25
Pandemic	50.8	0
Pandemic	47.371	0
Pandemic	55.245	2
Pandemic	52.9996	0
Pandemic	65.0011	2
Pandemic	47.3304	0
Pandemic	53.34	1
Pandemic	55.88	2
Pandemic	62.738	5
Pandemic	66.04	7
Pandemic	78.74	13
Pandemic	79.9998	17
Pandemic	85.344	20
Pandemic	87.63	25
Pandemic	94.996	33
Pandemic	49.53	0
Pandemic	48.9339	0
Pandemic	55.499	1
Pandemic	55.88	2
Pandemic	63.5	4
Pandemic	67.818	6
Pandemic	77.47	9
Pandemic	77.5995	10
Pandemic	81.6394	12
Pandemic	81.28	15
Pandemic	86.36	19
Pandemic	91.44	27
Pandemic	95.4989	32
Pandemic	54.403	0
Pandemic	58.42	2
Pandemic	66.04	5
Pandemic	71.12	7
Pandemic	71.0997	9
Pandemic	77.47	12
Pandemic	82.9996	15
Pandemic	83.82	17
Pandemic	86.36	19
Pandemic	86.36	21
Pandemic	88.9	25
Pandemic	93.2497	27
Pandemic	95.0011	31
Pandemic	49.2646	0
Pandemic	53.34	1
Pandemic	58.42	2
Pandemic	66.04	4
Pandemic	68.072	6
Pandemic	74.93	10
Pandemic	83.82	15
Pandemic	88.9	18
Pandemic	93.218	25
Pandemic	91.44	26
Pandemic	48.5064	0
Pandemic	53.975	1
Pandemic	58.0009	2
Pandemic	62.23	3
Pandemic	66.04	5
Pandemic	68.0009	7
Pandemic	75.0011	10
Pandemic	78.9991	15
Pandemic	46.99	0
Pandemic	59.9999	3
Pandemic	63.1	4
Pandemic	63.5	5
Pandemic	49.9999	0
Pandemic	46.4977	0
Pandemic	48.26	1
Pandemic	53.34	2
Pandemic	63.5	4
Pandemic	80.01	12
Pandemic	83.82	16
Pandemic	83.82	20
Pandemic	83.82	21
Pandemic	88.9991	26
Pandemic	91.44	33
Pandemic	50.5003	0
Pandemic	54.864	3
Pandemic	62.23	4
Pandemic	64.77	6
Pandemic	68.58	9
Pandemic	73.66	12
Pandemic	76.2	15
Pandemic	80.264	18
Pandemic	86.36	25
Pandemic	93.98	31
Pandemic	48.26	0
Pandemic	48.2752	0
Pandemic	49.53	1
Pandemic	55.88	2
Pandemic	50.9003	0
Pandemic	54.61	2
Pandemic	67.31	8
Pandemic	72.39	11
Pandemic	78.0009	15
Pandemic	79.9998	19
Pandemic	84.0003	24
Pandemic	89.9998	31
Pandemic	49.022	0
Pandemic	57.15	1
Pandemic	62.484	2
Pandemic	65.024	5
Pandemic	74.168	8
Pandemic	76.2	10
Pandemic	81.28	14
Pandemic	83.82	16
Pandemic	83.82	18
Pandemic	91.44	25
Pandemic	96.52	30
Pandemic	46.3135	0
Pandemic	53.34	2
Pandemic	58.42	3
Pandemic	58.42	5
Pandemic	62.992	7
Pandemic	67.31	9
Pandemic	71.9988	10
Pandemic	73.66	12
Pandemic	75.9993	15
Pandemic	79.9998	17
Pandemic	83.82	25
Pandemic	90.17	31
Pandemic	50.7009	0
Pandemic	50.9994	0
Pandemic	55.9994	1
Pandemic	63.5	3
Pandemic	71.9988	8
Pandemic	72.9996	9
Pandemic	77.47	12
Pandemic	80.01	13
Pandemic	86.36	21
Pandemic	81.0006	22
Pandemic	41.91	0
Pandemic	52.0649	0
Pandemic	54.61	1
Pandemic	59.055	2
Pandemic	70.5002	8
Pandemic	79.9376	12
Pandemic	47.5005	0
Pandemic	74.676	15
Pandemic	78.74	18
Pandemic	80.6894	25
Pandemic	85.3999	28
Pandemic	85.3948	29
Pandemic	83.82	31
Pandemic	85.1992	34
Pandemic	53.34	0
Pandemic	51.435	0
Pandemic	62.23	2
Pandemic	64.77	4
Pandemic	69.85	5
Pandemic	68.58	6
Pandemic	73.66	9
Pandemic	78.74	13
Pandemic	78.801	14
Pandemic	80.01	15
Pandemic	45.3961	0
Pandemic	53.34	2
Pandemic	57.15	4
Pandemic	61.9989	6
Pandemic	72.9996	12
Pandemic	76.2	15
Pandemic	76.4997	18
Pandemic	86.36	25
Pandemic	88.9	31
Pandemic	49.53	0
Pandemic	75.9993	15
Pandemic	49.1973	0
Pandemic	59.944	2
Pandemic	66.04	5
Pandemic	71.628	6
Pandemic	77.47	10
Pandemic	81.28	12
Pandemic	84.328	16
Pandemic	87.376	18
Pandemic	91.948	24
Pandemic	93.98	30
Pandemic	46.355	0
Pandemic	50.8	1
Pandemic	58.42	2
Pandemic	62.23	4
Pandemic	68.58	6
Pandemic	71.12	9
Pandemic	74.93	12
Pandemic	81.28	15
Pandemic	87.0001	18
Pandemic	85.9993	25
Pandemic	92.71	30
Pandemic	51.9328	0
Pandemic	59.69	2
Pandemic	66.04	4
Pandemic	70.104	6
Pandemic	77.47	10
Pandemic	78.9991	11
Pandemic	81.28	12
Pandemic	88.0008	18
Pandemic	54.4381	0
Pandemic	56.4998	1
Pandemic	56.4998	2
Pandemic	63.5	3
Pandemic	68.58	6
Pandemic	74.93	8
Pandemic	86.36	12
Pandemic	87.63	19
Pandemic	87.4497	23
Pandemic	92.075	24
Pandemic	88.9	25
Pandemic	97.0001	27
Pandemic	91.9988	28
Pandemic	91.9988	30
Pandemic	95.9993	31
Pandemic	49.6663	0
Pandemic	58.9991	2
Pandemic	50.8	0
Pandemic	48.0009	0
Pandemic	50.8	0
Pandemic	53.34	1
Pandemic	58.42	2
Pandemic	69.85	5
Pandemic	68.58	6
Pandemic	73.66	9
Pandemic	77.47	12
Pandemic	78.74	15
Pandemic	81.28	19
Pandemic	83.82	21
Pandemic	91.44	24
Pandemic	93.98	30
Pandemic	47.625	0
Pandemic	61.9989	9
Pandemic	77.47	12
Pandemic	82.4992	16
Pandemic	89.4994	22
Pandemic	91.0006	25
Pandemic	94.0003	27
Pandemic	96.4997	28
Pandemic	97.0001	32
Pandemic	51.0007	0
Pandemic	48.5079	0
Pandemic	57.658	3
Pandemic	73.66	11
Pandemic	74.93	14
Pandemic	82.9996	19
Pandemic	87.5005	25
Pandemic	51.9989	0
Pandemic	58.42	2
Pandemic	64.0004	4
Pandemic	71.0006	9
Pandemic	78.74	14
Pandemic	48.26	0
Pandemic	57.15	2
Pandemic	53.975	0
Pandemic	58.42	2
Pandemic	64.77	4
Pandemic	74.93	8
Pandemic	80.01	12
Pandemic	96.52	22
Pandemic	0	30
Pandemic	50.165	0
Pandemic	88.9991	26
Pandemic	88.6003	27
Pandemic	48.26	0
Pandemic	50.8	0
Pandemic	85.9993	25
Pandemic	87.0001	27
Pandemic	48.3997	0
Pandemic	51.501	2
Pandemic	59.4995	4
Pandemic	64.0004	6
Pandemic	66.675	9
Pandemic	73.66	12
Pandemic	77.47	15
Pandemic	78.74	19
Pandemic	83.82	23
Pandemic	88.9	33
Pandemic	52.705	0
Pandemic	59.69	2
Pandemic	67.945	4
Pandemic	72.39	6
Pandemic	51.1996	0
Pandemic	52.07	1
Pandemic	55.9994	2
Pandemic	60.96	4
Pandemic	64.77	6
Pandemic	69.85	9
Pandemic	73.66	13
Pandemic	75.9993	15
Pandemic	79.9998	16
Pandemic	78.74	18
Pandemic	77.47	19
Pandemic	82.4992	21
Pandemic	87.0001	24
Pandemic	53.4467	0
Pandemic	53.34	1
Pandemic	60.96	2
Pandemic	67.31	5
Pandemic	51.0007	0
Pandemic	57.15	1
Pandemic	63.5	2
Pandemic	73.66	7
Pandemic	88.9	17
Pandemic	90.17	19
Pandemic	90.17	26
Pandemic	50.8	0
Pandemic	58.42	2
Pandemic	71.755	7
Pandemic	90.17	23
Pandemic	96.52	34
Pandemic	51.0007	0
Pandemic	59.944	2
Pandemic	65.405	4
Pandemic	73.025	6
Pandemic	76.2	9
Pandemic	80.01	12
Pandemic	48.3794	0
Pandemic	52.9996	1
Pandemic	57.15	2
Pandemic	47.4133	0
Pandemic	51.435	1
Pandemic	55.88	2
Pandemic	62.23	4
Pandemic	68.58	6
Pandemic	71.12	10
Pandemic	75.565	13
Pandemic	78.7349	16
Pandemic	84.328	19
Pandemic	51.9989	0
Pandemic	46.99	0
Pandemic	52.3875	0
Pandemic	60.96	2
Pandemic	72.39	10
Pandemic	73.66	11
Pandemic	83.82	23
Pandemic	46.9951	0
Pandemic	55.88	2
Pandemic	61.0006	4
Pandemic	68.0009	7
Pandemic	78.74	13
Pandemic	79.9998	16
Pandemic	81.28	19
Pandemic	86.36	25
Pandemic	53.34	0
Pandemic	50.8	0
Pandemic	49.53	0
Pandemic	50.6671	0
Pandemic	52.1703	1
Pandemic	61.0006	4
Pandemic	67.31	7
Pandemic	78.5012	13
Pandemic	80.01	15
Pandemic	86.36	24
Pandemic	40.3335	0
Pandemic	43.8753	1
Pandemic	48.4149	2
Pandemic	53.6702	3
Pandemic	53.848	4
Pandemic	62.9996	5
Pandemic	63.1673	6
Pandemic	63.5	7
Pandemic	67.5005	9
Pandemic	76.4997	13
Pandemic	85.0011	16
Pandemic	81.0006	17
Pandemic	87.5995	23
Pandemic	91.0006	26
Pandemic	45.72	0
Pandemic	50.165	0
Pandemic	53.34	1
Pandemic	58.928	2
Pandemic	60.96	4
Pandemic	67.564	6
Pandemic	71.12	9
Pandemic	78.74	12
Pandemic	83.82	15
Pandemic	78.74	16
Pandemic	81.28	18
Pandemic	86.3735	19
Pandemic	81.28	21
Pandemic	88.9	26
Pandemic	91.0006	27
Pandemic	93.4999	32
Pandemic	96.4997	33
Pandemic	49.784	0
Pandemic	59.182	2
Pandemic	67.31	4
Pandemic	66.04	5
Pandemic	68.58	6
Pandemic	75.565	10
Pandemic	77.47	13
Pandemic	83.185	15
Pandemic	87.8002	22
Pandemic	91.9988	23
Pandemic	87.5005	24
Pandemic	87.0001	25
Pandemic	92.7989	26
Pandemic	92.4992	27
Pandemic	91.44	30
Pandemic	91.44	31
Pandemic	91.501	32
Pandemic	38.9992	0
Pandemic	42.6669	1
Pandemic	48.9991	2
Pandemic	53.34	0
Pandemic	60.96	2
Pandemic	86.36	15
Pandemic	48.26	0
Pandemic	62.799	4
Pandemic	49.4995	0
Pandemic	51.1996	0
Pandemic	54.2493	1
Pandemic	58.42	2
Pandemic	62.23	4
Pandemic	66.04	6
Pandemic	68.9991	9
Pandemic	74.93	12
Pandemic	79.9998	15
Pandemic	88.9	24
Pandemic	91.9988	25
Pandemic	97.79	28
Pandemic	92.1995	29
Pandemic	92.71	30
Pandemic	51.435	0
Pandemic	62.23	3
Pandemic	72.39	10
Pandemic	71.0006	11
Pandemic	82.55	18
Pandemic	86.36	23
Pandemic	90.17	28
Pandemic	51.9201	0
Pandemic	55.5286	1
Pandemic	67.0001	3
Pandemic	73.66	6
Pandemic	75.0011	8
Pandemic	81.28	10
Pandemic	82.55	12
Pandemic	88.9	16
Pandemic	91.0006	20
Pandemic	92.4992	24
Pandemic	93.4999	25
Pandemic	97.4992	30
Pandemic	48.6833	0
Pandemic	56.388	2
Pandemic	63.5	5
Pandemic	68.072	6
Pandemic	77.216	9
Pandemic	77.724	13
Pandemic	78.74	15
Pandemic	82.55	19
Pandemic	85.598	22
Pandemic	88.265	25
Pandemic	92.4992	31
Pandemic	47.9946	0
Pandemic	59.69	3
Pandemic	63.5	5
Pandemic	85.09	23
Pandemic	86.36	25
Pandemic	50.5003	0
Pandemic	50.8	0
Pandemic	52.705	0
Pandemic	49.53	0
Pandemic	50.8	0
Pandemic	61.468	2
Pandemic	66.548	4
Pandemic	73.66	7
Pandemic	47.2453	0
Pandemic	55.88	1
Pandemic	58.42	2
Pandemic	61.9354	4
Pandemic	67.625	7
Pandemic	78.74	13
Pandemic	77.47	14
Pandemic	87.0001	26
Pandemic	91.8007	32
Pandemic	52.4993	0
Pandemic	53.34	1
Pandemic	50.8	0
Pandemic	53.34	1
Pandemic	55.88	2
Pandemic	66.04	4
Pandemic	68.0009	6
Pandemic	73.66	9
Pandemic	78.74	13
Pandemic	80.645	16
Pandemic	0
Pandemic	49.5148	0
Pandemic	50.9329	0
Pandemic	55.9994	2
Pandemic	63.2511	4
Pandemic	68.0009	6
Pandemic	71.0006	10
Pandemic	73.66	12
Pandemic	73.66	15
Pandemic	77.5005	18
Pandemic	85.0011	25
Pandemic	88.199	31
Pandemic	49.511	0
Pandemic	48.895	0
Pandemic	55.88	2
Pandemic	62.738	4
Pandemic	45.9753	0
Pandemic	53.34	0
Pandemic	56.515	1
Pandemic	58.9991	2
Pandemic	85.9993	15
Pandemic	48.26	0
Pandemic	52.578	1
Pandemic	57.15	2
Pandemic	50.038	0
Pandemic	46.3448	0
[truncated: 76,031 more rows]

## Sheet: Fig 2C
Cohort	HC Age (months)	HC (cm)
Pandemic	0
Pandemic	3.51781	502.92
Pandemic	2.23562	487.68
Pandemic	3.97808	487.68
Pandemic	0.0657534	2.99974
Pandemic	0.164384	2.99974
Pandemic	0.0657534	2.99974
Pandemic	0.0328767	3.50012
Pandemic	1.47945	426.72
Pandemic	1.38082	426.72
Pandemic	0.0328767	5.00126
Pandemic	0.0328767	5.4991
Pandemic	0.0328767	8.99922
Pandemic	2.03836	370.2
Pandemic	2.76164	344.17
Pandemic	0.394521	11.999
Pandemic	0.756164	11.999
Pandemic	0.0986301	11.999
Pandemic	0.19726	11.999
Pandemic	0.0986301	12.3012
Pandemic	0.0986301	12.4993
Pandemic	0.394521	12.4993
Pandemic	0.0328767	12.4993
Pandemic	0.0986301	12.6009
Pandemic	0.328767	12.6009
Pandemic	0.19726	12.7508
Pandemic	0.164384	12.7508
Pandemic	0.131507	12.9997
Pandemic	0.0986301	12.9997
Pandemic	0.0657534	12.9997
Pandemic	0.19726	12.9997
Pandemic	0.164384	12.9997
Pandemic	0.19726	12.9997
Pandemic	0.920548	12.9997
Pandemic	0.0986301	12.9997
Pandemic	0.19726	12.9997
Pandemic	0	335.001
Pandemic	0.164384	12.9997
Pandemic	0.19726	12.9997
Pandemic	0.460274	12.9997
Pandemic	0.19726	12.9997
Pandemic	0.0986301	12.9997
Pandemic	4.01096	321.056
Pandemic	0.460274	12.9997
Pandemic	0.0986301	12.9997
Pandemic	0.526027	12.9997
Pandemic	0.0986301	12.9997
Pandemic	4.76712	295.91
Pandemic	0.131507	12.9997
Pandemic	0.131507	12.9997
Pandemic	0.131507	12.9997
Pandemic	0.164384	12.9997
Pandemic	0.19726	12.9997
Pandemic	0.131507	12.9997
Pandemic	0.263014	12.9997
Pandemic	0.361644	12.9997
Pandemic	0.19726	12.9997
Pandemic	0.361644	12.9997
Pandemic	0.394521	12.9997
Pandemic	9.20548	276.86
Pandemic	0.131507	13.2004
Pandemic	0.920548	13.2004
Pandemic	0.131507	13.2004
Pandemic	0.131507	13.2004
Pandemic	0.0986301	13.2004
Pandemic	0.427397	13.2512
Pandemic	0.328767	13.2512
Pandemic	0.164384	13.2512
Pandemic	0.164384	13.2512
Pandemic	0.230137	13.2512
Pandemic	0.230137	13.2512
Pandemic	0.0986301	13.2512
Pandemic	0.131507	13.2512
Pandemic	0.591781	13.5001
Pandemic	21.337	127
Pandemic	0.0986301	13.5001
Pandemic	0.131507	13.5001
Pandemic	0.131507	13.5001
Pandemic	0.131507	13.5001
Pandemic	0.19726	13.5001
Pandemic	0.0986301	13.5001
Pandemic	0.131507	13.5001
Pandemic	0.164384	13.5001
Pandemic	0.131507	13.5001
Pandemic	0.0657534	13.5001
Pandemic	0.131507	13.5001
Pandemic	0.131507	13.5001
Pandemic	0.0986301	13.5001
Pandemic	0.164384	13.5001
Pandemic	0.821918	13.5001
Pandemic	0.0986301	13.5001
Pandemic	0.164384	13.5001
Pandemic	0.230137	13.5001
Pandemic	0.19726	13.5001
Pandemic	0.230137	13.5001
Pandemic	0.131507	13.5001
Pandemic	18.0493	127
Pandemic	20.4493	124.46
Pandemic	0.164384	13.5001
Pandemic	0.131507	13.5001
Pandemic	18.1151	124.46
Pandemic	0.230137	13.5788
Pandemic	0.0986301	13.5992
Pandemic	0.164384	13.65
Pandemic	0.164384	13.7008
Pandemic	0.29589	13.7008
Pandemic	0.164384	13.749
Pandemic	0.164384	13.749
Pandemic	0.131507	13.749
Pandemic	0.131507	13.749
Pandemic	0.164384	13.7998
Pandemic	0.0986301	14.0005
Pandemic	0.131507	14.0005
Pandemic	18.4438	121.92
Pandemic	16.0438	121.92
Pandemic	0.131507	14.0005
Pandemic	0.986301	14.0005
Pandemic	7.36438	120.65
Pandemic	0.131507	14.0005
Pandemic	0.361644	14.0005
Pandemic	13.8082	119.38
Pandemic	0.131507	14.0005
Pandemic	0.361644	14.0005
Pandemic	0.0986301	14.0005
Pandemic	0.131507	14.0005
Pandemic	9.10685	118.11
Pandemic	0.131507	14.0005
Pandemic	0.164384	14.0005
Pandemic	9.63288	117.475
Pandemic	0.526027	14.0005
Pandemic	0.131507	14.0005
Pandemic	6.70685	115.57
Pandemic	0.131507	14.0005
Pandemic	6.60822	110.49
Pandemic	7.29863	109.22
Pandemic	0.558904	14.0005
Pandemic	0.131507	14.0005
Pandemic	0.953425	14.0005
Pandemic	0.131507	14.0005
Pandemic	0.493151	14.0005
Pandemic	0.131507	14.0005
Pandemic	0.0986301	14.0005
Pandemic	0.427397	14.0005
Pandemic	0.789041	14.0005
Pandemic	0.427397	14.0005
Pandemic	0.131507	14.0005
Pandemic	6.47671	109.22
Pandemic	0.460274	14.0005
Pandemic	0.29589	14.0005
Pandemic	0.558904	14.0005
Pandemic	0.0657534	14.0005
Pandemic	0.263014	14.0005
Pandemic	0.131507	14.0005
Pandemic	0.164384	14.0005
Pandemic	0.263014	14.0005
Pandemic	13.1178	109.22
Pandemic	0.131507	14.0005
Pandemic	0.328767	14.0005
Pandemic	0.164384	14.0005
Pandemic	0.460274	14.0005
Pandemic	6.34521	109.22
Pandemic	5.45753	107.95
Pandemic	0.591781	14.0005
Pandemic	0.723288	14.0005
Pandemic	6.11507	107.95
Pandemic	4.47123	106.68
Pandemic	1.47945	105.41
Pandemic	0.29589	14.0005
Pandemic	2.16986	104.14
Pandemic	2.92603	102.87
Pandemic	0.230137	14.0005
Pandemic	4.04384	101.6
Pandemic	0.624658	14.0005
Pandemic	0.131507	14.0005
Pandemic	0.361644	14.0005
Pandemic	1.51233	101.6
Pandemic	2.49863	100.965
Pandemic	0.263014	14.0005
Pandemic	0.0986301	14.0005
Pandemic	2.43288	99.06
Pandemic	0.394521	14.0005
Pandemic	1.21644	99.06
Pandemic	0.328767	14.0005
Pandemic	2.63014	97.79
Pandemic	1.9726	96.52
Pandemic	1.90685	96.52
Pandemic	0.493151	14.0005
Pandemic	0.0986301	14.0005
Pandemic	0.328767	14.0005
Pandemic	2.13699	96.52
Pandemic	7.13425	96.52
Pandemic	1.24932	95.25
Pandemic	1.8411	93.98
Pandemic	1.28219	91.44
Pandemic	1.05205	90.17
Pandemic	0.164384	14.2494
Pandemic	13.3479	88.5012
Pandemic	20.5479	85.0011
Pandemic	15.3534	78.994
Pandemic	0.263014	14.2494
Pandemic	0.230137	14.2494
Pandemic	13.5452	76.4997
Pandemic	14.9918	76.2
Pandemic	0.131507	14.5009
Pandemic	0.821918	14.5009
Pandemic	7.59452	75.0011
Pandemic	0.986301	14.5009
Pandemic	12.5918	73.66
Pandemic	0.394521	14.5009
Pandemic	6.31233	71.12
Pandemic	6.90411	69.9999
Pandemic	9.10685	68.58
Pandemic	4.20822	67.0001
Pandemic	9.33699	66.675
Pandemic	0.131507	14.5009
Pandemic	12.1973	66.04
Pandemic	0.854795	14.5009
Pandemic	0.493151	14.5009
Pandemic	0.953425	14.5009
Pandemic	0.493151	14.5009
Pandemic	9.0411	65.9994
Pandemic	0.230137	14.5009
Pandemic	4.2411	65.0011
Pandemic	0.756164	14.5999
Pandemic	1.08493	62.9996
Pandemic	0.164384	14.7498
Pandemic	17.9178	58.9991
Pandemic	1.11781	58.42
Pandemic	2.13699	55.88
Pandemic	1.05205	55.499
Pandemic	4.66849	55.0012
Pandemic	2.23562	54.7497
Pandemic	21.5342	54.0004
Pandemic	4.56986	54.0004
Pandemic	20.4164	53.975
Pandemic	10.1589	53.5
Pandemic	0.723288	15.0012
Pandemic	0.953425	15.0012
Pandemic	20.0877	53.5
Pandemic	4.56986	53.5
Pandemic	0.361644	15.0012
Pandemic	19.0685	53.34
Pandemic	20.1534	53.34
Pandemic	15.5178	53.34
Pandemic	18.1151	53.34
Pandemic	23.7041	53.34
Pandemic	18.8712	53.34
Pandemic	18.9699	53.34
Pandemic	19.1671	53.34
Pandemic	18.5425	53.34
Pandemic	15.3863	53.34
Pandemic	19.2658	53.34
Pandemic	20.6795	53.34
Pandemic	18.5096	53.34
Pandemic	19.2329	53.34
Pandemic	19.7589	53.34
Pandemic	16.9315	53.34
Pandemic	0.953425	15.0012
Pandemic	0.0986301	15.0012
Pandemic	19.463	53.34
Pandemic	15.9452	53.34
Pandemic	14.7945	53.34
Pandemic	15.4521	53.34
Pandemic	13.5123	53.34
Pandemic	17.2274	53.34
Pandemic	14.137	53.34
Pandemic	19.463	53.086
Pandemic	17.1945	52.9996
Pandemic	0.789041	15.0012
Pandemic	21.1397	52.9996
Pandemic	19.3644	52.9996
Pandemic	0.29589	15.0012
Pandemic	0.953425	15.0012
Pandemic	19.7918	52.9996
Pandemic	15.5836	52.9996
Pandemic	19.5288	52.9996
Pandemic	0	52.9996
Pandemic	16.6356	52.799
Pandemic	17.9836	52.705
Pandemic	20.2849	52.705
Pandemic	16.7014	52.705
Pandemic	22.2904	52.4993
Pandemic	23.9671	52.4993
Pandemic	21.337	52.4993
Pandemic	21.1397	52.4993
Pandemic	15.4192	52.4993
Pandemic	19.6603	52.4993
Pandemic	20.0548	52.4993
Pandemic	15.9781	52.3011
Pandemic	20.3836	52.2503
Pandemic	18.1151	52.07
Pandemic	18.8384	52.07
Pandemic	22.7507	52.07
Pandemic	18.2137	52.07
Pandemic	23.5068	52.07
Pandemic	16.7671	52.07
Pandemic	23.4411	52.07
Pandemic	23.1452	52.07
Pandemic	16.1425	52.07
Pandemic	21.0082	52.07
Pandemic	15.9123	52.07
Pandemic	23.2767	52.07
Pandemic	23.2438	52.07
Pandemic	19.9233	52.07
Pandemic	18.2466	52.07
Pandemic	20.4164	52.07
Pandemic	17.2274	52.07
Pandemic	19.8904	52.07
Pandemic	15.4521	52.07
Pandemic	22.0603	51.9989
Pandemic	9.73151	51.9989
Pandemic	21.2384	51.9989
Pandemic	16.7014	51.9989
Pandemic	18.6411	51.9989
Pandemic	13.5781	51.9989
Pandemic	22.7507	51.9989
Pandemic	12.1315	51.9989
Pandemic	20.0219	51.9989
Pandemic	18.3123	51.9989
Pandemic	21.5671	51.9989
Pandemic	10.7507	51.9989
Pandemic	18.2137	51.9989
Pandemic	12.1973	51.9989
Pandemic	18.1151	51.9989
Pandemic	20.7781	51.9989
Pandemic	18.3452	51.9989
Pandemic	18.7397	51.9989
Pandemic	24	51.9989
Pandemic	21.0411	51.9989
Pandemic	19.0356	51.9989
Pandemic	18.4767	51.9989
Pandemic	17.1288	51.9989
Pandemic	13.611	51.9989
Pandemic	12.6904	51.9989
Pandemic	13.1178	51.9989
Pandemic	12.0329	51.9989
Pandemic	15.4849	51.9989
Pandemic	16.3068	51.9989
Pandemic	18.2466	51.9989
Pandemic	18.0822	51.9989
Pandemic	8.84384	51.9989
Pandemic	12.0658	51.816
Pandemic	15.0247	51.816
Pandemic	12.7233	51.8008
Pandemic	15.0575	51.8008
Pandemic	14.5973	51.8008
Pandemic	21.8301	51.6992
Pandemic	19.0685	51.562
Pandemic	12.3288	51.562
Pandemic	18.0493	51.501
Pandemic	20.811	51.501
Pandemic	21.5014	51.501
Pandemic	13.6767	51.501
Pandemic	16.7014	51.501
Pandemic	21.1397	51.501
Pandemic	17.1945	51.501
Pandemic	21.0082	51.501
Pandemic	18.8384	51.501
Pandemic	20.0548	51.501
Pandemic	13.4466	51.501
Pandemic	14.1041	51.501
Pandemic	14.3671	51.501
Pandemic	14.7945	51.501
Pandemic	15.0575	51.501
Pandemic	20.1863	51.435
Pandemic	19.7589	51.435
Pandemic	16.8986	51.435
Pandemic	21.4356	51.435
Pandemic	16.1425	51.435
Pandemic	20.6466	51.435
Pandemic	15.1233	51.435
Pandemic	18.8384	51.435
Pandemic	24	51.435
Pandemic	18.937	51.435
Pandemic	19.2	51.435
Pandemic	19.4959	51.435
Pandemic	12.2959	51.435
Pandemic	14.4329	51.435
Pandemic	12.5918	51.308
Pandemic	0.0986301	16.4998
Pandemic	12.9205	51.308
Pandemic	20.3178	51.3004
Pandemic	12.789	51.2496
Pandemic	18.3123	51.1175
Pandemic	18.3123	51.054
Pandemic	12.2959	51.054
Pandemic	18.0493	51.0007
Pandemic	21.9288	51.0007
Pandemic	21.9288	51.0007
Pandemic	19.0685	51.0007
Pandemic	12.3288	51.0007
Pandemic	16.2411	51.0007
Pandemic	21.3041	51.0007
Pandemic	22.5863	51.0007
Pandemic	20.8438	51.0007
Pandemic	19.6932	51.0007
Pandemic	18.0493	51.0007
Pandemic	21.0082	51.0007
Pandemic	15.2877	51.0007
Pandemic	18.0493	51.0007
Pandemic	18.3781	51.0007
Pandemic	18.8055	51.0007
Pandemic	20.8438	51.0007
Pandemic	21.5014	51.0007
Pandemic	16.1096	51.0007
Pandemic	19.2986	51.0007
Pandemic	17.1616	51.0007
Pandemic	22.9151	51.0007
Pandemic	18.3123	51.0007
Pandemic	9.83014	51.0007
Pandemic	23.0137	51.0007
Pandemic	18.5425	51.0007
Pandemic	15.5178	51.0007
Pandemic	21.9945	51.0007
Pandemic	21.2712	51.0007
Pandemic	19.4959	51.0007
Pandemic	19.5616	51.0007
Pandemic	21.2712	51.0007
Pandemic	23.211	51.0007
Pandemic	19.1671	51.0007
Pandemic	13.9726	51.0007
Pandemic	19.1342	51.0007
Pandemic	14.6959	51.0007
Pandemic	15.7151	51.0007
Pandemic	17.0301	51.0007
Pandemic	16.3068	51.0007
Pandemic	18.1151	51.0007
Pandemic	21.337	51.0007
Pandemic	18.1808	51.0007
Pandemic	20.9425	51.0007
Pandemic	12.2301	51.0007
Pandemic	16.3726	51.0007
Pandemic	15.0247	51.0007
Pandemic	20.5808	51.0007
Pandemic	17.7205	51.0007
Pandemic	15.6493	51.0007
Pandemic	15.8466	51.0007
Pandemic	15.4849	51.0007
Pandemic	12.263	51.0007
Pandemic	17.8849	51.0007
Pandemic	15.0904	51.0007
Pandemic	15.0904	51.0007
Pandemic	13.2822	51.0007
Pandemic	12.0658	51.0007
Pandemic	12.0658	51.0007
Pandemic	8.81096	51.0007
Pandemic	18.1808	50.8991
Pandemic	12.0329	50.8
Pandemic	23.3425	50.8
Pandemic	18.937	50.8
Pandemic	18.5096	50.8
Pandemic	19.726	50.8
Pandemic	12.0986	50.8
Pandemic	22.8493	50.8
Pandemic	19.1014	50.8
Pandemic	19.1342	50.8
Pandemic	12.0658	50.8
Pandemic	15.0575	50.8
Pandemic	23.6712	50.8
Pandemic	15.8466	50.8
Pandemic	18.3781	50.8
Pandemic	21.9616	50.8
Pandemic	16.1425	50.8
Pandemic	20.1863	50.8
Pandemic	23.4082	50.8
Pandemic	21.9288	50.8
Pandemic	13.0192	50.8
Pandemic	13.3479	50.8
Pandemic	22.3562	50.8
Pandemic	20.811	50.8
Pandemic	11.4082	50.8
Pandemic	16.7671	50.8
Pandemic	18.7397	50.8
Pandemic	22.5534	50.8
Pandemic	18.0822	50.8
Pandemic	17.3589	50.8
Pandemic	20.0877	50.8
Pandemic	22.7507	50.8
Pandemic	18.6082	50.8
Pandemic	18.0164	50.8
Pandemic	19.1342	50.8
Pandemic	13.6767	50.8
Pandemic	18.6082	50.8
Pandemic	15.2877	50.8
Pandemic	18.3123	50.8
Pandemic	18.2466	50.8
Pandemic	22.0274	50.8
Pandemic	18.1808	50.8
Pandemic	14.3342	50.8
Pandemic	20.4493	50.8
Pandemic	22.3233	50.8
Pandemic	20.6795	50.8
Pandemic	18.6411	50.8
Pandemic	21.1397	50.8
Pandemic	18.3781	50.8
Pandemic	19.5945	50.8
Pandemic	12.0329	50.8
Pandemic	13.0849	50.8
Pandemic	19.5288	50.8
Pandemic	16.011	50.8
Pandemic	11.6712	50.8
Pandemic	15.5507	50.8
Pandemic	23.9342	50.8
Pandemic	20.5808	50.8
Pandemic	18.4767	50.8
Pandemic	18.411	50.8
Pandemic	15.2219	50.8
Pandemic	18.2137	50.8
Pandemic	16.4712	50.8
Pandemic	21.6	50.8
Pandemic	18.3781	50.8
Pandemic	22.2904	50.8
Pandemic	12.5589	50.8
Pandemic	16.3068	50.8
Pandemic	15.9452	50.8
Pandemic	21.4685	50.8
Pandemic	17.9507	50.8
Pandemic	22.0932	50.8
Pandemic	15.9781	50.8
Pandemic	18.1479	50.8
Pandemic	19.0685	50.8
Pandemic	20.1205	50.8
Pandemic	31.8904	18.001
Pandemic	14.9918	50.8
Pandemic	17.9836	50.8
Pandemic	18.8384	50.8
Pandemic	21.337	50.8
Pandemic	12.0986	50.8
Pandemic	23.1452	50.8
Pandemic	12.2959	50.8
Pandemic	16.7342	50.8
Pandemic	19.0356	50.8
Pandemic	17.7205	50.8
Pandemic	18.8055	50.8
Pandemic	23.1781	50.8
Pandemic	20.2192	50.8
Pandemic	25.1836	18.001
Pandemic	14.9589	50.8
Pandemic	18.1151	50.8
Pandemic	11.9014	50.8
Pandemic	24.8548	18.001
Pandemic	12.263	50.8
Pandemic	18.3452	50.8
Pandemic	21.5014	50.8
Pandemic	15.3205	50.8
Pandemic	0.263014	18.001
Pandemic	18.9041	50.8
Pandemic	18.0493	50.8
Pandemic	17.9836	50.8
Pandemic	0.0986301	18.001
Pandemic	16.3068	50.8
Pandemic	18.3781	50.8
Pandemic	22.8164	50.8
Pandemic	15.7479	50.8
Pandemic	23.1781	50.8
Pandemic	16.6027	50.8
Pandemic	17.6219	50.8
Pandemic	13.5452	50.8
Pandemic	15.9123	50.8
Pandemic	15.6822	50.8
Pandemic	14.4658	50.8
Pandemic	22.8164	50.8
Pandemic	9.53425	50.8
Pandemic	23.474	50.8
Pandemic	18.4438	50.8
Pandemic	18.0164	50.8
Pandemic	19.3644	50.8
Pandemic	18.1151	50.8
Pandemic	20.3836	50.8
Pandemic	21.2384	50.8
Pandemic	22.5863	50.8
Pandemic	18.0822	50.8
Pandemic	15.0575	50.8
Pandemic	22.3562	50.8
Pandemic	21.5342	50.8
Pandemic	19.5616	50.8
Pandemic	13.8082	50.8
Pandemic	21.9288	50.8
Pandemic	17.9178	50.8
Pandemic	21.3699	50.8
Pandemic	20.4493	50.8
Pandemic	15.2548	50.8
Pandemic	20.6466	50.8
Pandemic	17.9507	50.8
Pandemic	22.5534	50.8
Pandemic	0.493151	18.001
Pandemic	24	50.8
Pandemic	21.9945	50.8
Pandemic	12.8548	50.8
Pandemic	15.7479	50.8
Pandemic	19.463	50.8
Pandemic	20.0219	50.8
Pandemic	17.9507	50.8
Pandemic	19.1014	50.8
Pandemic	18.7726	50.8
Pandemic	20.3178	50.8
Pandemic	18.7726	50.8
Pandemic	21.5014	50.8
Pandemic	13.1178	50.8
Pandemic	17.9836	50.8
Pandemic	17.1288	50.8
Pandemic	21.6658	50.8
Pandemic	12.526	50.8
Pandemic	16.5699	50.8
Pandemic	18.9699	50.8
Pandemic	18.5753	50.8
Pandemic	18.3452	50.8
Pandemic	19.3644	50.8
Pandemic	16.3726	50.8
Pandemic	12.1973	50.8
Pandemic	17.9836	50.8
Pandemic	19.8247	50.8
Pandemic	14.8932	50.8
Pandemic	16.7014	50.8
Pandemic	28.4384	18.1991
Pandemic	18.5096	50.8
Pandemic	15.0904	50.8
Pandemic	17.4575	50.8
Pandemic	18.7397	50.8
Pandemic	18.1808	50.8
Pandemic	20.0877	50.8
Pandemic	18.4438	50.8
Pandemic	17.0959	50.8
Pandemic	18.3452	50.8
Pandemic	15.3863	50.8
Pandemic	13.5781	50.8
Pandemic	18.1479	50.8
Pandemic	14.0712	50.8
Pandemic	18.8384	50.8
Pandemic	19.3644	50.8
Pandemic	19.2658	50.8
Pandemic	19.5288	50.8
Pandemic	15.0575	50.8
Pandemic	12.3288	50.8
Pandemic	19.1014	50.8
Pandemic	0.427397	18.4988
Pandemic	9.56712	50.8
Pandemic	15.189	50.8
Pandemic	18.2137	50.8
Pandemic	16.3068	50.8
Pandemic	18.3781	50.8
Pandemic	0.19726	18.4988
Pandemic	15.2877	50.8
Pandemic	24.0329	18.4988
Pandemic	18.7397	50.8
Pandemic	15.8137	50.8
Pandemic	18.2466	50.8
Pandemic	18.4767	50.8
Pandemic	13.4137	50.8
Pandemic	18.0822	50.8
Pandemic	15.2877	50.8
Pandemic	16.3726	50.8
Pandemic	17.8521	50.8
Pandemic	15.8466	50.8
Pandemic	24.4932	18.4988
Pandemic	12.0658	50.8
Pandemic	12.1644	50.8
Pandemic	13.7425	50.8
Pandemic	12.3616	50.8
Pandemic	12.4274	50.8
Pandemic	12.6247	50.8
Pandemic	12.263	50.8
Pandemic	13.4795	50.8
Pandemic	11.2438	50.8
Pandemic	10.8164	50.8
Pandemic	12.1644	50.8
Pandemic	13.4795	50.8
Pandemic	12.3288	50.8
Pandemic	0.164384	18.4988
Pandemic	12.0986	50.8
Pandemic	21.2712	50.546
Pandemic	18.2466	50.546
Pandemic	0.0328767	18.4988
Pandemic	24	50.5003
Pandemic	20.9096	50.5003
Pandemic	22.8493	50.5003
Pandemic	19.4301	50.5003
Pandemic	21.7315	50.5003
Pandemic	12.4603	50.5003
Pandemic	12.8877	50.5003
Pandemic	13.8411	50.5003
Pandemic	18.2137	50.5003
Pandemic	22.3562	50.5003
Pandemic	15.6164	50.5003
Pandemic	20.5151	50.5003
Pandemic	11.6384	50.5003
Pandemic	24.789	18.7503
Pandemic	12.6247	50.5003
Pandemic	21.1397	50.5003
Pandemic	18.0493	50.5003
Pandemic	24.6904	18.9992
Pandemic	0.591781	18.9992
Pandemic	25.2822	18.9992
Pandemic	25.7425	18.9992
Pandemic	28.5041	18.9992
Pandemic	20.0877	50.5003
Pandemic	21.3699	50.5003
Pandemic	20.3507	50.5003
Pandemic	0.0657534	18.9992
Pandemic	0.29589	18.9992
Pandemic	0.624658	18.9992
Pandemic	24.0658	18.9992
Pandemic	24.0329	18.9992
Pandemic	24.3288	18.9992
Pandemic	15.5507	50.5003
Pandemic	25.1836	18.9992
Pandemic	23.1781	50.5003
Pandemic	18.0822	50.5003
Pandemic	24.6247	18.9992
Pandemic	19.0685	50.5003
Pandemic	12.1315	50.5003
Pandemic	23.6384	50.5003
Pandemic	21.7973	50.5003
Pandemic	24.1315	18.9992
Pandemic	24.4603	18.9992
Pandemic	24.3616	18.9992
Pandemic	24.0329	18.9992
Pandemic	9.10685	50.5003
Pandemic	24.1973	18.9992
Pandemic	0.131507	18.9992
Pandemic	24.1644	18.9992
Pandemic	25.0521	18.9992
Pandemic	15.9123	50.5003
Pandemic	24.0658	18.9992
Pandemic	24.8219	18.9992
Pandemic	20.1863	50.5003
Pandemic	24.1644	18.9992
Pandemic	25.3479	18.9992
Pandemic	21.0411	50.5003
Pandemic	24.5589	18.9992
Pandemic	19.2986	50.5003
Pandemic	15.4849	50.5003
Pandemic	14.4329	50.5003
Pandemic	11.8027	50.5003
Pandemic	9.33699	50.5003
Pandemic	13.8411	50.5003
Pandemic	17.9836	50.5003
Pandemic	21.8959	50.5003
Pandemic	22.7836	50.5003
Pandemic	18.4767	50.5003
Pandemic	20.5479	50.5003
Pandemic	12.0329	50.5003
Pandemic	19.0027	50.5003
Pandemic	17.4575	50.5003
Pandemic	12.4603	50.5003
Pandemic	12.0986	50.5003
Pandemic	18.6411	50.5003
Pandemic	18.9041	50.5003
Pandemic	13.2822	50.5003
Pandemic	13.6438	50.5003
Pandemic	14.3671	50.5003
Pandemic	21.9616	50.2996
Pandemic	20.2849	50.2996
Pandemic	22.1589	50.292
Pandemic	12.0658	50.292
Pandemic	15.9123	50.292
Pandemic	15.7808	50.292
Pandemic	14.6959	50.292
Pandemic	19.6274	50.292
Pandemic	14.1699	50.292
Pandemic	15.5507	50.292
Pandemic	15.189	50.292
Pandemic	18.9699	50.2488
Pandemic	15.1562	50.2006
Pandemic	15.7479	50.2006
Pandemic	18.6082	50.2006
Pandemic	18.8384	50.2006
Pandemic	18.411	50.165
Pandemic	14.3671	50.165
Pandemic	0.164384	18.9992
Pandemic	0.29589	18.9992
Pandemic	15.0575	50.165
Pandemic	11.7041	50.165
Pandemic	16.2411	50.165
Pandemic	22.3233	50.165
Pandemic	0.29589	18.9992
Pandemic	21.8959	50.165
Pandemic	21.4027	50.165
Pandemic	18.0493	50.165
Pandemic	23.737	50.165
Pandemic	18.0822	50.165
Pandemic	19.1671	50.165
Pandemic	19.2	50.165
Pandemic	18.3452	50.165
Pandemic	18.3123	50.165
Pandemic	18.0493	50.165
Pandemic	14.9918	50.165
Pandemic	28.9644	19.1008
Pandemic	19.1671	50.165
Pandemic	22.9479	50.165
Pandemic	30.8712	19.1999
Pandemic	25.7425	19.1999
Pandemic	19.8575	50.165
Pandemic	15.189	50.165
Pandemic	8.97534	50.165
Pandemic	30.411	19.2507
Pandemic	21.4685	50.165
Pandemic	20.6466	50.165
Pandemic	15.8137	50.165
Pandemic	30.6082	19.4996
Pandemic	15.5507	50.165
Pandemic	27.2219	19.4996
Pandemic	19.0685	50.165
Pandemic	31.4959	19.4996
Pandemic	15.7151	50.165
Pandemic	18.5425	50.165
Pandemic	0.526027	19.4996
Pandemic	0.657534	19.4996
Pandemic	0.690411	19.4996
Pandemic	25.2164	19.4996
Pandemic	24.4603	19.4996
Pandemic	17.2274	50.165
Pandemic	20.2192	50.165
Pandemic	24.0658	19.4996
Pandemic	19.6932	50.165
Pandemic	18.8712	50.165
Pandemic	17.2603	50.165
Pandemic	16.3397	50.165
Pandemic	23.9342	50.165
Pandemic	24.0329	19.4996
Pandemic	16.1753	50.165
Pandemic	17.9836	50.165
Pandemic	9.07397	50.165
Pandemic	17.9836	50.165
Pandemic	0.591781	19.4996
Pandemic	21.6329	50.165
Pandemic	0.263014	19.4996
Pandemic	19.0685	50.165
Pandemic	0.19726	19.4996
Pandemic	0.230137	19.4996
Pandemic	18.1808	50.165
Pandemic	21.074	50.165
Pandemic	16.8	50.165
Pandemic	0.624658	19.4996
Pandemic	15.4521	50.165
Pandemic	15.4521	50.165
Pandemic	30.7726	19.751
Pandemic	24.0329	19.751
Pandemic	12.0329	50.165
Pandemic	30.4767	20
Pandemic	34.0603	20
Pandemic	25.1507	20
Pandemic	31.6274	20
Pandemic	8.6137	50.165
Pandemic	0.131507	20
Pandemic	0.361644	20
Pandemic	0.624658	20
Pandemic	0.821918	20
Pandemic	0.854795	20
Pandemic	18.9699	50.165
Pandemic	19.989	50.038
Pandemic	28.274	20
Pandemic	21.9945	50.038
Pandemic	0.723288	20
Pandemic	0.756164	20
Pandemic	0.789041	20
Pandemic	24.8219	20
Pandemic	24.0329	20
Pandemic	0.29589	20
Pandemic	24.1644	20
Pandemic	24.1315	20
Pandemic	25.5781	20
Pandemic	24.4932	20
Pandemic	25.9068	20
Pandemic	23.2438	50.038
Pandemic	9.6	50.038
Pandemic	24.1315	20
Pandemic	0.0986301	20
Pandemic	21.5671	50.038
Pandemic	9.86301	50.038
Pandemic	0.0986301	20
Pandemic	12.4932	50.038
Pandemic	0.230137	20
Pandemic	5.88493	50.038
Pandemic	0.427397	20
Pandemic	21.4685	49.9999
Pandemic	0.427397	20
Pandemic	0.131507	20
Pandemic	19.5945	49.9999
Pandemic	15.4521	49.9999
Pandemic	0.460274	20
Pandemic	17.8192	49.9999
Pandemic	0.854795	20
Pandemic	0.19726	20
Pandemic	0.427397	20
Pandemic	10.2575	49.9999
Pandemic	30.7397	20.5003
Pandemic	0.821918	20.5003
Pandemic	0.854795	20.5003
Pandemic	0.887671	20.5003
Pandemic	0.920548	20.5003
Pandemic	0.0986301	20.5003
Pandemic	0.657534	20.5003
Pandemic	0.887671	20.5003
Pandemic	30.1479	20.5003
Pandemic	0.263014	20.5003
Pandemic	0.29589	20.5003
Pandemic	0.723288	20.5003
Pandemic	0.723288	20.5003
Pandemic	11.0466	49.9999
Pandemic	0.361644	20.5003
Pandemic	15.0904	49.9999
Pandemic	0.328767	20.5003
Pandemic	19.8575	49.9999
Pandemic	14.7616	49.9999
Pandemic	0.230137	20.5003
Pandemic	0.263014	20.5003
Pandemic	0.29589	20.5003
Pandemic	0.328767	20.5003
Pandemic	0.328767	20.5003
Pandemic	0.361644	20.5003
Pandemic	0.394521	20.5003
Pandemic	16.8986	49.9999
Pandemic	0.19726	20.5003
Pandemic	0.230137	20.5003
Pandemic	0.263014	20.5003
Pandemic	0.263014	20.5003
Pandemic	0.263014	20.5003
Pandemic	0.29589	20.5003
Pandemic	0.361644	20.5003
Pandemic	0.854795	20.5003
Pandemic	0.854795	20.5003
Pandemic	18.3123	49.9999
Pandemic	24.4603	20.5994
Pandemic	6.93699	49.9999
Pandemic	0.164384	21.0007
Pandemic	19.8247	49.9999
Pandemic	19.6932	49.9999
Pandemic	0.789041	21.0007
Pandemic	0.986301	21.0007
Pandemic	0.19726	21.0007
Pandemic	0.427397	21.0007
Pandemic	0.328767	21.0007
Pandemic	0.230137	21.0007
Pandemic	0.821918	21.0007
Pandemic	0.394521	21.0007
Pandemic	0.624658	21.0007
Pandemic	19.9233	49.9999
Pandemic	20.1205	49.9999
Pandemic	0.460274	21.0007
Pandemic	0.953425	21.0007
Pandemic	0.19726	21.0007
Pandemic	0.394521	21.0007
Pandemic	0.624658	21.0007
Pandemic	22.0603	49.9999
Pandemic	24.2959	21.0007
Pandemic	9.07397	49.9999
Pandemic	0.394521	21.0007
Pandemic	19.5288	49.9999
Pandemic	15.3205	49.9999
Pandemic	0.328767	21.0007
Pandemic	0.460274	21.0007
Pandemic	0.690411	21.0007
Pandemic	0.493151	21.0007
Pandemic	0.460274	21.0007
Pandemic	0.723288	21.0007
Pandemic	12.4274	49.9999
Pandemic	0.19726	21.0007
Pandemic	0.657534	21.0007
Pandemic	0.789041	21.0007
Pandemic	0.19726	21.0007
Pandemic	0.394521	21.0007
Pandemic	0.427397	21.0007
Pandemic	0.460274	21.0007
Pandemic	0.460274	21.0007
Pandemic	0.493151	21.0007
Pandemic	0.591781	21.0007
Pandemic	0.624658	21.0007
Pandemic	0.657534	21.0007
Pandemic	0.690411	21.0007
Pandemic	0.723288	21.0007
Pandemic	0.756164	21.0007
Pandemic	0.164384	21.0007
Pandemic	0.263014	21.0007
Pandemic	0.29589	21.0007
Pandemic	0.29589	21.0007
Pandemic	0.394521	21.0007
Pandemic	14.2027	49.9999
Pandemic	0.986301	21.0007
Pandemic	15.0575	49.9999
Pandemic	19.463	49.9999
Pandemic	0.164384	21.0007
Pandemic	0.29589	21.0007
Pandemic	0.394521	21.0007
Pandemic	0.427397	21.0007
Pandemic	0.723288	21.0007
Pandemic	0.427397	21.0007
Pandemic	0.526027	21.0007
Pandemic	0.657534	21.0007
Pandemic	18.1151	49.9999
Pandemic	0.230137	21.0007
Pandemic	21.8959	49.9999
Pandemic	0.328767	21.2496
Pandemic	0.230137	21.5011
Pandemic	21.7315	49.9999
Pandemic	0.558904	21.5011
Pandemic	0.723288	21.5011
Pandemic	18.0493	49.9999
Pandemic	24	49.9999
Pandemic	21.337	49.9999
Pandemic	0.624658	21.5011
Pandemic	18.5753	49.9999
Pandemic	18.0822	49.9999
Pandemic	0.29589	21.5011
Pandemic	0.460274	21.5011
Pandemic	0.164384	21.5011
Pandemic	0.394521	21.5011
Pandemic	0.263014	21.5011
Pandemic	0.361644	21.5011
Pandemic	18.937	49.9999
Pandemic	18.5425	49.9999
Pandemic	21.2055	49.9999
Pandemic	0.164384	21.5011
Pandemic	0.460274	21.5011
Pandemic	0.657534	21.5011
Pandemic	18.411	49.9999
Pandemic	0.263014	21.5011
Pandemic	0.493151	21.5011
Pandemic	0.953425	21.5011
Pandemic	0.427397	21.5011
Pandemic	0.460274	21.5011
Pandemic	0.493151	21.5011
Pandemic	0.526027	21.5011
Pandemic	0.558904	21.5011
Pandemic	0.591781	21.5011
Pandemic	12.6247	49.9999
Pandemic	17.1945	49.9999
Pandemic	0.427397	21.5011
Pandemic	0.460274	21.5011
Pandemic	0.493151	21.5011
Pandemic	0.493151	21.5011
Pandemic	0.526027	21.5011
Pandemic	0.164384	21.5011
Pandemic	0.854795	21.5011
Pandemic	0.657534	21.5011
Pandemic	21.4027	49.9999
Pandemic	0.29589	21.5011
Pandemic	0.0986301	21.5011
Pandemic	0.19726	21.5011
Pandemic	0.558904	21.5011
Pandemic	10.2904	49.9999
Pandemic	18.7068	49.9999
Pandemic	17.6877	49.9999
Pandemic	0.854795	21.75
Pandemic	0.427397	21.9989
Pandemic	0.328767	21.9989
Pandemic	0.789041	21.9989
Pandemic	18.1151	49.9999
Pandemic	0.394521	21.9989
Pandemic	23.6055	49.9999
Pandemic	18.674	49.9999
Pandemic	18.2795	49.9999
Pandemic	0.131507	21.9989
Pandemic	0.361644	21.9989
Pandemic	13.3151	49.9999
Pandemic	0.394521	21.9989
Pandemic	19.8904	49.9999
Pandemic	20.6466	49.9999
Pandemic	0.263014	21.9989
Pandemic	0.427397	21.9989
Pandemic	0.526027	21.9989
Pandemic	0.493151	21.9989
Pandemic	0.526027	21.9989
Pandemic	0.657534	21.9989
Pandemic	0.690411	21.9989
Pandemic	0.723288	21.9989
Pandemic	0.920548	21.9989
Pandemic	0.920548	21.9989
Pandemic	0.558904	21.9989
Pandemic	0.29589	21.9989
Pandemic	0.460274	21.9989
Pandemic	0.526027	21.9989
Pandemic	21.0411	49.9999
Pandemic	0.29589	21.9989
Pandemic	21.6	49.9999
Pandemic	0.558904	21.9989
Pandemic	0.591781	21.9989
Pandemic	0.624658	21.9989
Pandemic	0.690411	21.9989
Pandemic	0.723288	21.9989
Pandemic	16.9315	49.9999
Pandemic	0.427397	21.9989
Pandemic	0.427397	21.9989
Pandemic	0.427397	21.9989
Pandemic	0.624658	21.9989
Pandemic	0.624658	21.9989
Pandemic	16.6685	49.9999
Pandemic	0.0657534	21.9989
Pandemic	0.0986301	21.9989
Pandemic	0.328767	21.9989
Pandemic	0.427397	21.9989
Pandemic	0.558904	21.9989
Pandemic	0.230137	21.9989
Pandemic	0.624658	21.9989
Pandemic	0.657534	21.9989
Pandemic	0.920548	21.9989
Pandemic	0.558904	21.9989
Pandemic	0.789041	21.9989
Pandemic	15.4521	49.9999
Pandemic	0.723288	21.9989
Pandemic	24	49.9999
Pandemic	0.789041	21.9989
Pandemic	0.953425	21.9989
Pandemic	0.986301	21.9989
Pandemic	15.6493	49.9999
Pandemic	12.1973	49.9999
Pandemic	20.1863	49.9999
Pandemic	21.6	49.9999
Pandemic	0.624658	21.9989
Pandemic	0.887671	21.9989
Pandemic	15.8795	49.9999
Pandemic	18.6411	49.9999
Pandemic	0.394521	21.9989
Pandemic	0.328767	21.9989
Pandemic	0.0657534	21.9989
Pandemic	0.0986301	21.9989
Pandemic	0.854795	21.9989
Pandemic	0.920548	21.9989
Pandemic	0.953425	21.9989
Pandemic	0.986301	21.9989
Pandemic	20.811	49.9999
Pandemic	17.9836	49.9999
Pandemic	0.526027	21.9989
Pandemic	0.558904	21.9989
Pandemic	0.591781	21.9989
Pandemic	14.5315	49.9999
Pandemic	19.6274	49.9999
Pandemic	14.9589	49.9999
Pandemic	23.9342	49.9999
Pandemic	12.0986	49.9999
Pandemic	0.394521	21.9989
Pandemic	0.854795	21.9989
Pandemic	0.361644	21.9989
Pandemic	0.657534	21.9989
Pandemic	0.657534	21.9989
Pandemic	0.887671	21.9989
Pandemic	0.394521	21.9989
Pandemic	0.624658	21.9989
Pandemic	0.887671	21.9989
Pandemic	0.558904	21.9989
Pandemic	0.0657534	21.9989
Pandemic	0.0986301	21.9989
Pandemic	0.29589	21.9989
Pandemic	0.526027	21.9989
Pandemic	19.6274	49.9999
Pandemic	17.6548	49.9999
Pandemic	19.8575	49.9999
Pandemic	0.558904	22.1996
Pandemic	0.887671	22.2504
Pandemic	0.0328767	22.4511
Pandemic	23.1452	49.9999
Pandemic	0.164384	22.4993
Pandemic	0.131507	22.4993
Pandemic	14.6301	49.9999
Pandemic	0.164384	22.4993
Pandemic	0.526027	22.4993
Pandemic	18.3123	49.9999
Pandemic	19.3644	49.9999
Pandemic	0.526027	22.4993
Pandemic	16.6027	49.9999
Pandemic	0.756164	22.4993
Pandemic	0.887671	22.4993
Pandemic	19.8247	49.9999
Pandemic	0.526027	22.4993
Pandemic	17.9507	49.9999
Pandemic	20.0548	49.9999
Pandemic	18.7068	49.9999
Pandemic	0.0986301	22.4993
Pandemic	0.0657534	22.4993
Pandemic	0.789041	22.4993
Pandemic	0.690411	22.4993
Pandemic	0.821918	22.4993
Pandemic	0.854795	22.4993
Pandemic	0.0657534	22.4993
Pandemic	0.0657534	22.4993
Pandemic	0.558904	22.4993
Pandemic	0.657534	22.4993
Pandemic	0.558904	22.4993
Pandemic	0.986301	22.4993
Pandemic	10.389	49.9999
Pandemic	0.624658	22.4993
Pandemic	0.230137	22.4993
Pandemic	0.263014	22.4993
Pandemic	18.4438	49.9999
Pandemic	19.3315	49.9999
Pandemic	0.624658	22.4993
Pandemic	12.263	49.9999
Pandemic	18.1808	49.9999
Pandemic	15.0247	49.9999
Pandemic	0.394521	22.4993
Pandemic	0.854795	22.4993
Pandemic	0.164384	22.4993
Pandemic	0.131507	22.4993
Pandemic	0.361644	22.4993
Pandemic	0.591781	22.4993
Pandemic	0.0657534	22.4993
Pandemic	0.493151	22.4993
Pandemic	0.887671	22.4993
Pandemic	15.7151	49.9999
Pandemic	0.0657534	22.4993
Pandemic	17.8192	49.9999
Pandemic	0.690411	22.4993
Pandemic	18.3781	49.9999
Pandemic	0.0657534	22.9997
Pandemic	0.29589	22.9997
Pandemic	0.854795	22.9997
Pandemic	0.0657534	22.9997
Pandemic	0.591781	22.9997
Pandemic	17.3918	49.9999
Pandemic	18.1151	49.9999
Pandemic	15.0247	49.9999
Pandemic	12.1973	49.9999
Pandemic	0.361644	22.9997
Pandemic	0.591781	22.9997
Pandemic	0.29589	22.9997
Pandemic	12.526	49.9999
Pandemic	0.657534	22.9997
Pandemic	0.657534	22.9997
Pandemic	0.361644	22.9997
Pandemic	20.3507	49.9999
Pandemic	0.756164	22.9997
Pandemic	15.0575	49.9999
Pandemic	19.1014	49.9999
Pandemic	18.5096	49.9999
Pandemic	17.8849	49.9999
Pandemic	0.789041	22.9997
Pandemic	0.230137	22.9997
Pandemic	0.460274	22.9997
Pandemic	19.5616	49.9999
Pandemic	15.4849	49.9999
Pandemic	0.131507	22.9997
Pandemic	0.493151	22.9997
Pandemic	0.723288	22.9997
Pandemic	18.0822	49.9999
Pandemic	15.0247	49.9999
Pandemic	18.1151	49.9999
Pandemic	15.3534	49.9999
Pandemic	18.8055	49.9999
Pandemic	15.0575	49.9999
Pandemic	12	49.9999
Pandemic	19.2	49.9999
Pandemic	0.591781	22.9997
Pandemic	9.89589	49.9999
Pandemic	0.29589	22.9997
Pandemic	0.723288	22.9997
Pandemic	0.723288	22.9997
Pandemic	18.4767	49.9999
Pandemic	0.131507	22.9997
Pandemic	0.690411	22.9997
Pandemic	18.1479	49.9999
Pandemic	0.328767	22.9997
Pandemic	9.76438	49.9999
Pandemic	0.263014	22.9997
Pandemic	0.29589	22.9997
Pandemic	0.394521	22.9997
Pandemic	0.427397	22.9997
Pandemic	0.526027	22.9997
Pandemic	11.1123	49.9999
Pandemic	0.657534	22.9997
Pandemic	0.460274	22.9997
Pandemic	12.8548	49.9999
Pandemic	0.19726	22.9997
Pandemic	0.394521	22.9997
Pandemic	0.723288	22.9997
Pandemic	0.887671	22.9997
Pandemic	15.0247	49.9999
Pandemic	18.3452	49.9999
Pandemic	11.211	49.9999
Pandemic	0.0328767	22.9997
Pandemic	0.0328767	22.9997
Pandemic	17.6877	49.9999
Pandemic	13.6767	49.9999
Pandemic	0.230137	22.9997
Pandemic	0.460274	22.9997
Pandemic	13.9726	49.9999
Pandemic	0.953425	22.9997
Pandemic	15.0575	49.9999
Pandemic	14.0384	49.9999
Pandemic	0.887671	22.9997
Pandemic	0.624658	22.9997
Pandemic	15.0904	49.9999
Pandemic	15.4521	49.9999
Pandemic	15.5507	49.9999
Pandemic	16.011	49.9999
Pandemic	0.131507	22.9997
Pandemic	0.0986301	22.9997
Pandemic	15.1233	49.9999
Pandemic	15.7151	49.9999
Pandemic	0.460274	22.9997
Pandemic	0.460274	22.9997
Pandemic	0.526027	22.9997
Pandemic	0.591781	22.9997
Pandemic	0.657534	22.9997
Pandemic	12.3616	49.9999
Pandemic	0.0328767	22.9997
Pandemic	0.920548	22.9997
Pandemic	0.953425	22.9997
Pandemic	0.953425	22.9997
Pandemic	0.953425	22.9997
Pandemic	9.30411	49.9999
Pandemic	9.07397	49.9999
Pandemic	13.7753	49.9999
Pandemic	15.0575	49.9008
Pandemic	2.26849	49.7992
Pandemic	16.011	49.7992
Pandemic	18.0493	49.7992
Pandemic	18.4767	49.7992
Pandemic	0.29589	22.9997
Pandemic	0.624658	22.9997
Pandemic	0.624658	22.9997
Pandemic	0.657534	22.9997
Pandemic	0.690411	22.9997
Pandemic	0.690411	22.9997
Pandemic	16.6027	49.7992
Pandemic	18.0164	49.7992
Pandemic	18.1151	49.784
Pandemic	9.23836	49.784
Pandemic	0.361644	22.9997
Pandemic	0.29589	22.9997
Pandemic	0.328767	22.9997
Pandemic	0.558904	22.9997
Pandemic	22.5205	49.784
Pandemic	12.1315	49.784
Pandemic	0.789041	22.9997
Pandemic	0.624658	22.9997
Pandemic	0.394521	22.9997
Pandemic	0.493151	22.9997
Pandemic	0.821918	22.9997
Pandemic	20.1534	49.784
Pandemic	0.19726	22.9997
Pandemic	0.328767	22.9997
Pandemic	0.328767	22.9997
Pandemic	0.19726	22.9997
Pandemic	18.0164	49.784
Pandemic	13.2164	49.784
Pandemic	0.657534	22.9997
Pandemic	0.131507	22.9997
Pandemic	0.131507	22.9997
Pandemic	0.394521	22.9997
Pandemic	18.8712	49.784
Pandemic	15.0247	49.784
Pandemic	14.9918	49.784
Pandemic	17.9836	49.784
Pandemic	17.4247	49.784
Pandemic	0.361644	23.2004
Pandemic	0.690411	23.5001
Pandemic	15.7151	49.784
Pandemic	15.6822	49.784
Pandemic	15.8466	49.784
Pandemic	16.274	49.6011
Pandemic	13.3808	49.6011
Pandemic	18.5753	49.53
Pandemic	19.8575	49.53
Pandemic	0.624658	23.5001
Pandemic	0.657534	23.5001
Pandemic	0.723288	23.5001
Pandemic	0.723288	23.5001
Pandemic	0.723288	23.5001
Pandemic	0.756164	23.5001
Pandemic	21.1726	49.53
Pandemic	16.5041	49.53
Pandemic	21.1397	49.53
Pandemic	15.2548	49.53
Pandemic	14.4658	49.53
Pandemic	17.0301	49.53
Pandemic	0.854795	23.5001
Pandemic	0.526027	23.5001
Pandemic	0.986301	23.5001
Pandemic	9.89589	49.53
Pandemic	0.953425	23.5001
Pandemic	0.986301	23.5001
Pandemic	0.690411	23.5001
Pandemic	19.9562	49.53
Pandemic	0.756164	23.5001
Pandemic	19.2986	49.53
Pandemic	18.0164	49.53
Pandemic	18.8712	49.53
Pandemic	0.0986301	23.5001
Pandemic	0.361644	23.5001
Pandemic	19.0356	49.53
Pandemic	0.789041	23.5001
Pandemic	14.7288	49.53
Pandemic	18.1151	49.53
Pandemic	21.1068	49.53
Pandemic	15.1233	49.53
Pandemic	0.493151	23.5001
Pandemic	0.361644	23.5001
Pandemic	16.274	49.53
Pandemic	0.558904	23.5001
Pandemic	0.591781	23.5001
Pandemic	0.690411	23.5001
Pandemic	0.756164	23.5001
Pandemic	0.887671	23.5001
Pandemic	19.1014	49.53
Pandemic	0.986301	23.5001
Pandemic	23.1452	49.53
Pandemic	0.263014	23.5001
Pandemic	0.493151	23.5001
Pandemic	0.789041	23.5001
Pandemic	0.230137	23.5001
Pandemic	0.263014	23.5001
Pandemic	21.9616	49.53
Pandemic	18.2795	49.53
Pandemic	0.0986301	23.5001
Pandemic	0.328767	23.5001
Pandemic	23.3753	49.53
Pandemic	0.854795	23.5001
Pandemic	0.164384	23.5001
Pandemic	0.19726	23.5001
Pandemic	12.1973	49.53
Pandemic	0.460274	23.5001
Pandemic	0.526027	23.5001
Pandemic	0.723288	23.5001
Pandemic	0.723288	23.5001
Pandemic	0.756164	23.5001
Pandemic	0.789041	23.5001
Pandemic	0.821918	23.5001
Pandemic	0.821918	23.5001
Pandemic	18.0493	49.53
Pandemic	0.0657534	23.5001
Pandemic	0.526027	23.5001
Pandemic	0.558904	23.5001
Pandemic	16.1096	49.53
Pandemic	12.1644	49.53
Pandemic	24	49.53
Pandemic	13.3808	49.53
Pandemic	23.8685	49.53
Pandemic	15.8795	49.53
Pandemic	18.2137	49.53
Pandemic	18.1808	49.53
Pandemic	22.9479	49.53
Pandemic	0.0986301	23.5001
Pandemic	0.526027	23.5001
Pandemic	0.756164	23.5001
Pandemic	0.723288	23.5001
Pandemic	0.756164	23.5001
Pandemic	0.756164	23.5001
Pandemic	15.0904	49.53
Pandemic	18.0822	49.53
Pandemic	0.29589	23.5001
Pandemic	18.9699	49.53
Pandemic	16.1425	49.53
Pandemic	0.558904	23.5001
Pandemic	0.591781	23.5001
Pandemic	0.591781	23.5001
Pandemic	18.5096	49.53
Pandemic	19.8575	49.53
Pandemic	18.0822	49.53
Pandemic	22.5534	49.53
Pandemic	12.8219	49.53
Pandemic	19.4959	49.53
Pandemic	0.164384	23.5001
Pandemic	23.9014	49.53
Pandemic	0.230137	23.5001
Pandemic	0.263014	23.5001
Pandemic	0.29589	23.5001
Pandemic	0.361644	23.5001
Pandemic	0.394521	23.5001
Pandemic	0.427397	23.5001
Pandemic	0.887671	23.5001
Pandemic	0.493151	23.5001
Pandemic	0.920548	23.5001
Pandemic	24	49.53
Pandemic	15.2548	49.53
Pandemic	16.1096	49.53
Pandemic	0.0986301	24.0005
Pandemic	0.131507	24.0005
Pandemic	18.1479	49.53
Pandemic	0.164384	24.0005
Pandemic	0.657534	24.0005
Pandemic	0.230137	24.0005
Pandemic	0.821918	24.0005
Pandemic	0.526027	24.0005
Pandemic	19.2658	49.53
Pandemic	22.2575	49.53
Pandemic	12.0658	49.53
Pandemic	18.0822	49.53
Pandemic	15.4192	49.53
Pandemic	20.9425	49.53
Pandemic	19.2329	49.53
Pandemic	20.0877	49.53
Pandemic	22.2904	49.53
Pandemic	24	49.53
Pandemic	0.427397	24.0005
Pandemic	0.460274	24.0005
Pandemic	0.493151	24.0005
Pandemic	0.789041	24.0005
Pandemic	12.0658	49.53
Pandemic	15.0247	49.53
Pandemic	18.1479	49.53
Pandemic	0.427397	24.0005
Pandemic	0.657534	24.0005
Pandemic	0.887671	24.0005
Pandemic	0.263014	24.0005
Pandemic	0.493151	24.0005
Pandemic	21.7644	49.53
Pandemic	0.29589	24.0005
Pandemic	0.756164	24.0005
Pandemic	23.6055	49.53
Pandemic	0.131507	24.0005
Pandemic	0.29589	24.0005
Pandemic	0.427397	24.0005
Pandemic	0.19726	24.0005
Pandemic	18.411	49.53
Pandemic	0.0657534	24.0005
Pandemic	0.19726	24.0005
Pandemic	0.19726	24.0005
Pandemic	22.1918	49.53
Pandemic	23.5726	49.53
Pandemic	15.4521	49.53
Pandemic	15.189	49.53
Pandemic	18.1808	49.53
Pandemic	15.7479	49.53
Pandemic	18.1479	49.53
Pandemic	15.4849	49.53
Pandemic	18.1151	49.53
Pandemic	15.0904	49.53
Pandemic	14.3014	49.53
Pandemic	20.0548	49.53
Pandemic	19.9233	49.53
Pandemic	18.2466	49.53
Pandemic	0.789041	24.0005
Pandemic	0.558904	24.0005
Pandemic	0.624658	24.0005
Pandemic	0.854795	24.0005
Pandemic	17.1616	49.53
Pandemic	10.2904	49.53
Pandemic	0.230137	24.0005
Pandemic	15.1562	49.53
Pandemic	18.2795	49.53
Pandemic	0.723288	24.0005
Pandemic	21.5671	49.53
Pandemic	15.6164	49.53
Pandemic	0.427397	24.0005
Pandemic	20.0548	49.53
Pandemic	13.2822	49.53
Pandemic	15.7151	49.53
Pandemic	0.591781	24.0005
Pandemic	0.591781	24.0005
Pandemic	17.2603	49.53
Pandemic	19.3973	49.53
Pandemic	12.1973	49.53
Pandemic	15.0904	49.53
Pandemic	18.2795	49.53
Pandemic	23.9342	49.53
Pandemic	18.8384	49.53
Pandemic	16.3068	49.53
Pandemic	20.811	49.53
Pandemic	0.394521	24.0005
Pandemic	0.230137	24.0005
Pandemic	18.3452	49.53
Pandemic	15.9452	49.53
Pandemic	0.0986301	24.0005
Pandemic	0.328767	24.0005
Pandemic	0.558904	24.0005
Pandemic	0.821918	24.0005
Pandemic	0.854795	24.0005
Pandemic	0.887671	24.0005
Pandemic	0.953425	24.0005
Pandemic	0.953425	24.0005
Pandemic	0.986301	24.0005
Pandemic	18.0493	49.53
Pandemic	20.5151	49.53
Pandemic	20.6795	49.53
Pandemic	18.7068	49.53
Pandemic	19.6603	49.53
Pandemic	23.211	49.53
Pandemic	23.2767	49.53
Pandemic	19.8247	49.53
Pandemic	20.1863	49.53
Pandemic	19.4959	49.53
Pandemic	0.394521	24.0005
Pandemic	0.394521	24.0005
Pandemic	0.394521	24.0005
Pandemic	19.4959	49.53
Pandemic	0.493151	24.0005
Pandemic	0.953425	24.0005
Pandemic	22.3233	49.53
Pandemic	0.164384	24.0005
Pandemic	0.394521	24.0005
Pandemic	0.854795	24.0005
Pandemic	0.854795	24.0005
Pandemic	0.854795	24.0005
Pandemic	0.887671	24.0005
Pandemic	19.2	49.53
Pandemic	15.2219	49.53
Pandemic	18.2466	49.53
Pandemic	18.2137	49.53
Pandemic	19.8904	49.53
Pandemic	16.4384	49.53
Pandemic	18.5096	49.53
Pandemic	0.493151	24.0005
Pandemic	0.723288	24.0005
Pandemic	15.1233	49.53
Pandemic	16.6685	49.53
Pandemic	22.1589	49.53
Pandemic	19.9562	49.53
Pandemic	0.0986301	24.0005
Pandemic	0.789041	24.0005
Pandemic	23.7699	49.53
Pandemic	18.1151	49.53
Pandemic	18.1808	49.53
Pandemic	21.6	49.53
Pandemic	17.4247	49.53
Pandemic	19.0685	49.53
Pandemic	0.263014	24.0005
Pandemic	0.263014	24.0005
Pandemic	0.493151	24.0005
Pandemic	0.723288	24.0005
Pandemic	16.9315	49.53
Pandemic	18.6411	49.53
Pandemic	0.328767	24.0005
Pandemic	18.1808	49.53
Pandemic	18.1479	49.53
Pandemic	0.460274	24.0005
Pandemic	0.657534	24.0005
Pandemic	0.427397	24.0005
Pandemic	0.460274	24.0005
Pandemic	12.0986	49.53
Pandemic	12.0986	49.53
Pandemic	0.591781	24.0005
Pandemic	0.821918	24.0005
Pandemic	0.756164	24.0005
Pandemic	20.1863	49.53
Pandemic	21.7644	49.53
Pandemic	17.7205	49.53
Pandemic	18.6411	49.53
Pandemic	0.953425	24.2011
Pandemic	0.920548	24.2494
Pandemic	12.1973	49.53
Pandemic	0.526027	24.5008
Pandemic	12.526	49.53
Pandemic	21.1068	49.53
Pandemic	15.4521	49.53
Pandemic	0.427397	24.5008
Pandemic	0.789041	24.5008
Pandemic	0.263014	24.5008
Pandemic	0.394521	24.5008
Pandemic	0.394521	24.5008
Pandemic	0.427397	24.5008
Pandemic	16.8	49.53
Pandemic	18.6082	49.53
Pandemic	0.756164	24.5008
Pandemic	18.8712	49.53
Pandemic	18.1479	49.53
Pandemic	15.3863	49.53
Pandemic	23.9671	49.53
Pandemic	0.0328767	24.5008
Pandemic	0.328767	24.5008
Pandemic	0.854795	24.5008
Pandemic	0.887671	24.5008
Pandemic	0.920548	24.5008
Pandemic	0.953425	24.5008
Pandemic	0.986301	24.5008
Pandemic	18.0164	49.53
Pandemic	14.9918	49.53
Pandemic	18.1151	49.53
Pandemic	18.0822	49.53
Pandemic	19.0685	49.53
Pandemic	16.7014	49.53
Pandemic	15.4521	49.53
Pandemic	19.1014	49.53
Pandemic	0.164384	24.5008
Pandemic	0.19726	24.5008
Pandemic	0.690411	24.5008
Pandemic	0.394521	24.5008
Pandemic	19.3644	49.53
Pandemic	13.0521	49.53
Pandemic	18.1151	49.53
Pandemic	14.6959	49.53
Pandemic	23.9671	49.53
Pandemic	0.460274	24.5008
Pandemic	0.361644	24.5008
Pandemic	0.591781	24.5008
Pandemic	0.789041	24.5008
Pandemic	9.40274	49.53
Pandemic	13.5123	49.53
Pandemic	21.8301	49.53
Pandemic	12.3945	49.53
Pandemic	0.723288	24.5008
Pandemic	0.756164	24.5008
Pandemic	18.1151	49.53
Pandemic	0.493151	24.5008
Pandemic	0.624658	24.5008
Pandemic	0.723288	24.5008
Pandemic	0.690411	24.5008
Pandemic	16.2082	49.53
Pandemic	18.0493	49.53
Pandemic	12.6575	49.53
Pandemic	15.1562	49.53
Pandemic	18.5425	49.53
Pandemic	0.526027	24.5008
Pandemic	0.29589	24.5008
Pandemic	0.493151	24.5008
Pandemic	18.3781	49.53
Pandemic	12.1315	49.53
Pandemic	16.6685	49.53
Pandemic	15.6493	49.53
Pandemic	19.4959	49.53
Pandemic	19.1014	49.53
Pandemic	19.1671	49.53
Pandemic	0.723288	24.5008
Pandemic	18.7726	49.53
Pandemic	23.8356	49.53
Pandemic	0.427397	24.5008
Pandemic	0.657534	24.5008
Pandemic	12.263	49.53
Pandemic	17.8849	49.53
Pandemic	21.5342	49.53
Pandemic	23.9342	49.53
Pandemic	22.7178	49.53
Pandemic	0.821918	24.5008
Pandemic	0.986301	24.5008
Pandemic	16.274	49.53
Pandemic	12.2959	49.53
Pandemic	17.0959	49.53
Pandemic	19.0027	49.53
Pandemic	19.3315	49.53
Pandemic	20.6137	49.53
Pandemic	0.657534	24.5008
Pandemic	18.2466	49.53
Pandemic	16.4055	49.53
Pandemic	18.674	49.53
Pandemic	21.6986	49.53
Pandemic	15.0247	49.53
Pandemic	0.29589	24.5008
Pandemic	17.9836	49.53
Pandemic	12.6247	49.53
Pandemic	20.1534	49.53
Pandemic	0.19726	24.5008
Pandemic	0.427397	24.5008
Pandemic	0.493151	24.5008
Pandemic	0.526027	24.5008
Pandemic	0.591781	24.5008
Pandemic	0.624658	24.5008
Pandemic	0.756164	24.5008
Pandemic	0.821918	24.5008
Pandemic	0.854795	24.5008
Pandemic	0.887671	24.5008
Pandemic	16.5699	49.53
Pandemic	0.19726	24.5008
Pandemic	17.2274	49.53
Pandemic	19.8575	49.53
Pandemic	18.2466	49.53
Pandemic	0.19726	24.5008
Pandemic	0.427397	24.5008
Pandemic	18.7397	49.53
Pandemic	12.1315	49.53
Pandemic	14.4986	49.53
Pandemic	0.953425	24.5008
Pandemic	18.1808	49.53
Pandemic	18.6411	49.53
Pandemic	24	49.53
Pandemic	18.0822	49.53
Pandemic	21.6658	49.53
Pandemic	15.0247	49.53
Pandemic	20.9753	49.53
Pandemic	19.0685	49.53
Pandemic	18.2795	49.53
Pandemic	14.9918	49.53
Pandemic	0.920548	25.0012
Pandemic	0.29589	25.0012
Pandemic	0.0328767	25.0012
Pandemic	0.0657534	25.0012
Pandemic	0.230137	25.0012
Pandemic	0.460274	25.0012
Pandemic	0.690411	25.0012
Pandemic	20.0548	49.53
Pandemic	18.0493	49.53
Pandemic	18.3123	49.53
Pandemic	0.19726	25.0012
Pandemic	18.4767	49.53
Pandemic	23.4082	49.53
Pandemic	15.2548	49.53
Pandemic	21.2712	49.53
Pandemic	0.394521	25.0012
Pandemic	0.821918	25.0012
Pandemic	0.854795	25.0012
Pandemic	0.821918	25.0012
Pandemic	0.0986301	25.0012
Pandemic	0.558904	25.0012
Pandemic	21.4356	49.53
Pandemic	0.328767	25.0012
Pandemic	0.328767	25.0012
Pandemic	0.624658	25.0012
Pandemic	0.657534	25.0012
Pandemic	0.986301	25.0012
Pandemic	14.1699	49.53
Pandemic	18.4438	49.53
Pandemic	18.8712	49.53
Pandemic	22.126	49.53
Pandemic	0.230137	25.0012
Pandemic	16.7671	49.53
Pandemic	0.887671	25.0012
Pandemic	17.9836	49.53
Pandemic	21.8301	49.53
Pandemic	0.0328767	25.0012
Pandemic	0.131507	25.0012
Pandemic	0.361644	25.0012
Pandemic	0.361644	25.0012
Pandemic	5.75342	49.53
Pandemic	12.5589	49.53
Pandemic	18.1151	49.53
Pandemic	0.723288	25.0012
Pandemic	19.3973	49.53
Pandemic	0.526027	25.0012
Pandemic	0.920548	25.0012
Pandemic	12.2301	49.53
Pandemic	18.6082	49.53
Pandemic	0.657534	25.0012
Pandemic	1.01918	49.53
Pandemic	21.4027	49.53
Pandemic	12.4932	49.53
Pandemic	0.427397	25.0012
Pandemic	0.131507	25.0012
Pandemic	0.164384	25.0012
Pandemic	0.328767	25.0012
Pandemic	0.821918	25.0012
Pandemic	19.4301	49.53
Pandemic	15.0247	49.53
Pandemic	0.690411	25.0012
Pandemic	0.526027	25.0012
Pandemic	0.328767	25.0012
Pandemic	0.558904	25.0012
Pandemic	18.5096	49.53
Pandemic	18.7397	49.53
Pandemic	20.8438	49.53
Pandemic	15.6493	49.53
Pandemic	18.5425	49.53
Pandemic	0.953425	25.0012
Pandemic	15.6493	49.53
Pandemic	18.2466	49.53
Pandemic	12.789	49.53
Pandemic	21.1726	49.53
Pandemic	18.0164	49.53
Pandemic	20.811	49.53
Pandemic	18.674	49.53
Pandemic	19.6274	49.53
Pandemic	18.6411	49.53
Pandemic	0.493151	25.0012
Pandemic	0.361644	25.0012
Pandemic	0.920548	25.0012
Pandemic	15.0247	49.53
Pandemic	14.4658	49.53
Pandemic	0.0328767	25.0012
Pandemic	15.9781	49.53
Pandemic	0.230137	25.0012
Pandemic	17.9507	49.53
Pandemic	18.3452	49.53
Pandemic	0.131507	25.0012
Pandemic	15.5836	49.53
Pandemic	21.7644	49.53
Pandemic	0.920548	25.0012
Pandemic	12.6575	49.53
Pandemic	15.0575	49.53
Pandemic	18.2137	49.53
Pandemic	0.263014	25.0012
Pandemic	19.6274	49.53
Pandemic	18.7726	49.53
Pandemic	21.4685	49.53
Pandemic	16.9973	49.53
Pandemic	17.7205	49.53
Pandemic	19.5616	49.53
Pandemic	16.6356	49.53
Pandemic	12.1315	49.53
Pandemic	12	49.53
Pandemic	12.3945	49.53
Pandemic	14.926	49.53
Pandemic	0.657534	25.0012
Pandemic	0.789041	25.0012
Pandemic	0.460274	25.0012
Pandemic	0.756164	25.0012
Pandemic	0.0328767	25.0012
Pandemic	0.0657534	25.0012
Pandemic	0.230137	25.0012
Pandemic	0.986301	25.0012
Pandemic	18.2466	49.53
Pandemic	0.29589	25.0012
Pandemic	0.328767	25.0012
Pandemic	0.427397	25.0012
Pandemic	0.526027	25.0012
Pandemic	0.789041	25.0012
Pandemic	15.1562	49.53
Pandemic	0.394521	25.0012
Pandemic	0.887671	25.0012
Pandemic	18.0164	49.53
Pandemic	21.5342	49.53
Pandemic	20.2192	49.53
Pandemic	19.0685	49.53
Pandemic	0.19726	25.0012
Pandemic	19.2658	49.53
Pandemic	0.131507	25.0012
Pandemic	0.591781	25.0012
Pandemic	12.1644	49.53
Pandemic	0.986301	25.0012
Pandemic	15.3534	49.53
Pandemic	18.1151	49.53
Pandemic	18.5096	49.53
Pandemic	12.0329	49.53
Pandemic	15.7151	49.53
Pandemic	0.427397	25.0012
Pandemic	0.526027	25.0012
Pandemic	0.263014	25.0012
Pandemic	9.66575	49.53
Pandemic	0.29589	25.0012
Pandemic	19.3644	49.53
Pandemic	18.2137	49.53
Pandemic	17.7534	49.53
Pandemic	18.2795	49.53
Pandemic	13.4137	49.53
Pandemic	15.0247	49.53
Pandemic	0.690411	25.0012
Pandemic	18.5753	49.53
Pandemic	12.1644	49.53
Pandemic	18.411	49.53
Pandemic	0.558904	25.0012
Pandemic	0.624658	25.0012
Pandemic	0.657534	25.0012
Pandemic	0.690411	25.0012
Pandemic	0.657534	25.0012
Pandemic	0.657534	25.0012
Pandemic	0.657534	25.0012
Pandemic	0.723288	25.0012
Pandemic	0.920548	25.0012
Pandemic	0.920548	25.0012
Pandemic	0.328767	25.0012
Pandemic	0.361644	25.0012
Pandemic	9.99452	49.53
Pandemic	0.657534	25.0012
Pandemic	18.7397	49.53
Pandemic	0.29589	25.0012
Pandemic	18.411	49.53
Pandemic	19.1014	49.53
Pandemic	0.591781	25.0012
Pandemic	0.723288	25.0012
Pandemic	20.811	49.53
Pandemic	12.4932	49.53
Pandemic	15.0575	49.53
Pandemic	16.9973	49.53
Pandemic	15.0247	49.53
Pandemic	19.6274	49.53
Pandemic	19.726	49.53
Pandemic	0.756164	25.3009
Pandemic	0.690411	25.4
Pandemic	19.5288	49.53
Pandemic	12.0658	49.53
Pandemic	0.493151	25.4991
Pandemic	15.5836	49.53
Pandemic	19.0027	49.53
Pandemic	0.657534	25.4991
Pandemic	15.5178	49.53
Pandemic	18.1151	49.53
Pandemic	19.2986	49.53
Pandemic	16.5699	49.53
Pandemic	0.624658	25.4991
Pandemic	0.854795	25.4991
Pandemic	0.854795	25.4991
Pandemic	0.887671	25.4991
Pandemic	0.887671	25.4991
Pandemic	0.920548	25.4991
Pandemic	0.953425	25.4991
Pandemic	0.953425	25.4991
Pandemic	0.986301	25.4991
Pandemic	0.986301	25.4991
Pandemic	16.1096	49.53
Pandemic	12.2301	49.53
Pandemic	0.230137	25.4991
Pandemic	15.8795	49.53
Pandemic	0.328767	25.4991
Pandemic	0.361644	25.4991
Pandemic	0.394521	25.4991
Pandemic	16.1425	49.53
Pandemic	0.460274	25.4991
Pandemic	0.493151	25.4991
Pandemic	0.526027	25.4991
Pandemic	0.526027	25.4991
Pandemic	0.558904	25.4991
Pandemic	0.789041	25.4991
Pandemic	0.789041	25.4991
Pandemic	0.887671	25.4991
Pandemic	18.5753	49.53
Pandemic	19.2	49.53
Pandemic	19.1014	49.53
Pandemic	9.30411	49.53
Pandemic	0.29589	25.4991
Pandemic	0.591781	25.4991
Pandemic	16.3068	49.53
Pandemic	15.2219	49.53
Pandemic	18.1808	49.53
Pandemic	15.189	49.53
Pandemic	0.427397	25.4991
Pandemic	0.624658	25.4991
Pandemic	13.7425	49.53
Pandemic	17.8849	49.53
Pandemic	9.0411	49.53
Pandemic	16.1425	49.53
Pandemic	0.953425	25.4991
Pandemic	0.723288	25.4991
Pandemic	18.2466	49.53
[truncated: 200,213+ more rows]
